# Supplementary material for: Nucleophilic ring-opening reactions of trans-2-aroyl-3-aryl-cyclopropane-1,1-dicarboxylates with hydrazines
Source: Royal Society of Chemistry journal article supplement (doi:10.1039/c6ob02552h), 2017-01-01

## Electronic Supplementary Information

### Nucleophilic Ring-Opening Reactions of *trans*-2-Aroyl-3-Aryl-Cyclopropane-1,1-Dicarboxylates with Hydrazines

Gopal Sathishkannan, V. John Tamilarasan and Kannupal Srinivasan\*

School of Chemistry, Bharathidasan University, Tiruchirappalli-620 024, Tamil Nadu, India

Copies of  $^1\text{H}$  NMR and  $^{13}\text{C}$  NMR spectra .....S2-S51

# COPIES OF <sup>1</sup>H NMR AND <sup>13</sup>C NMR SPECTRA

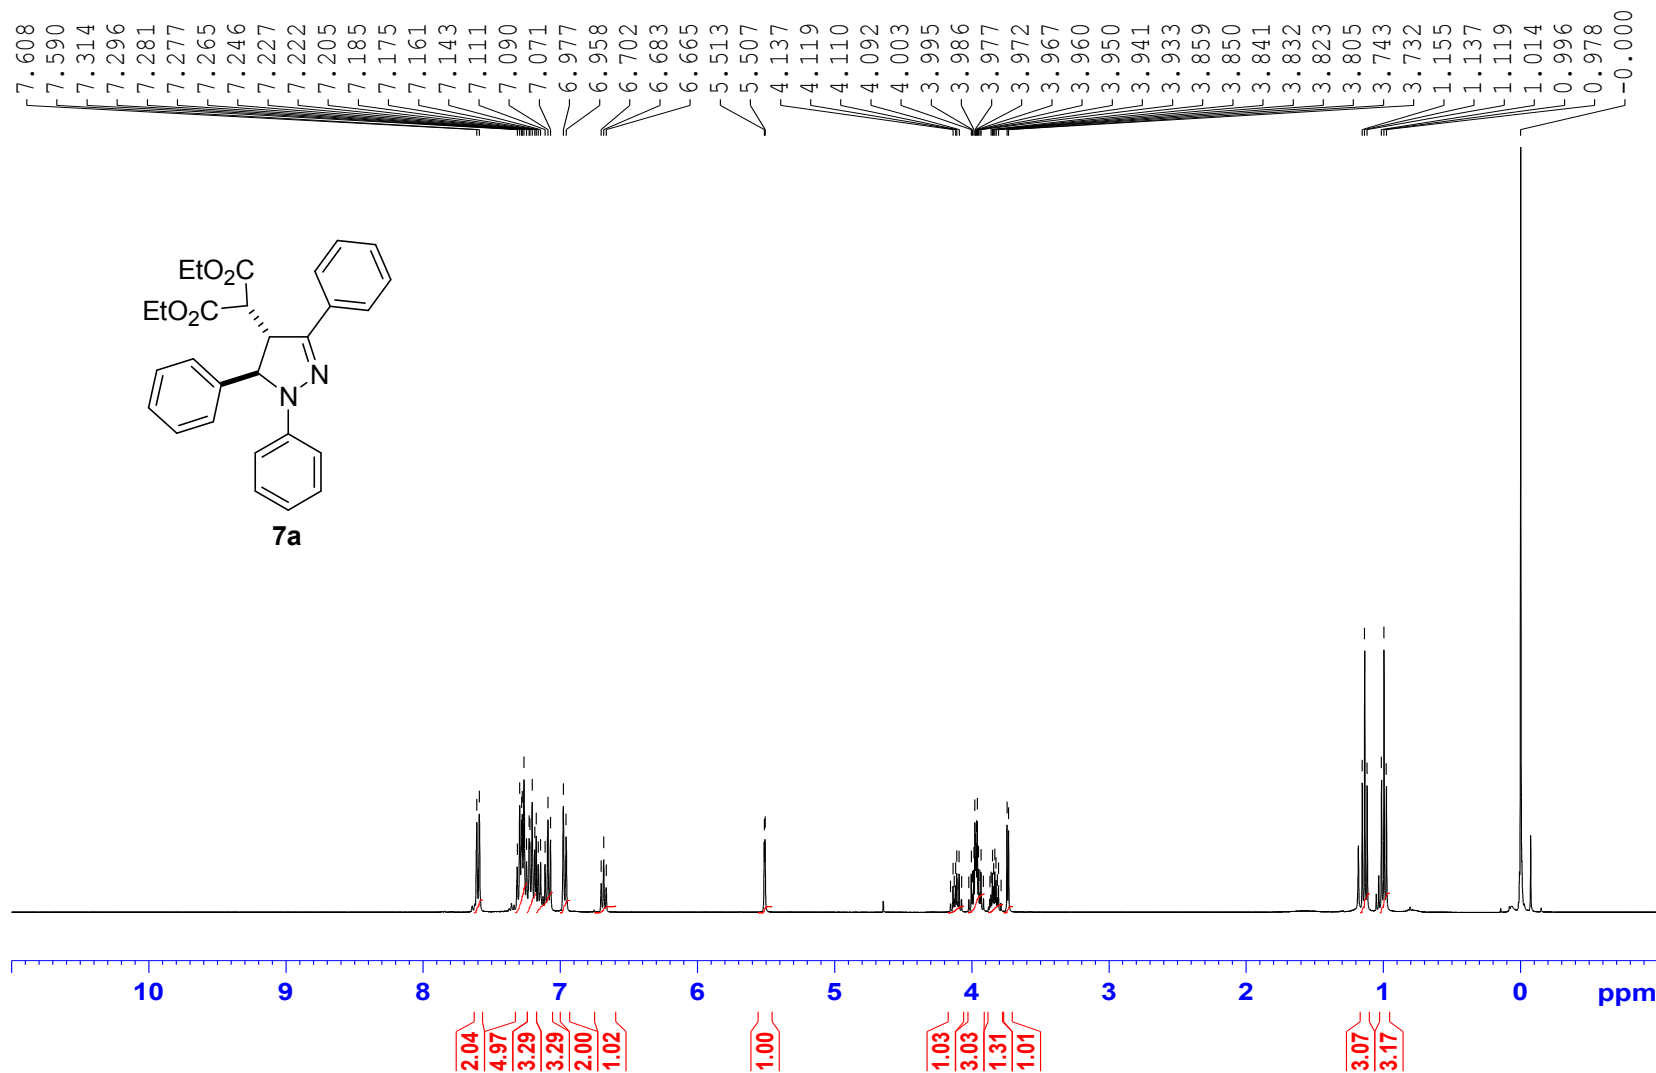

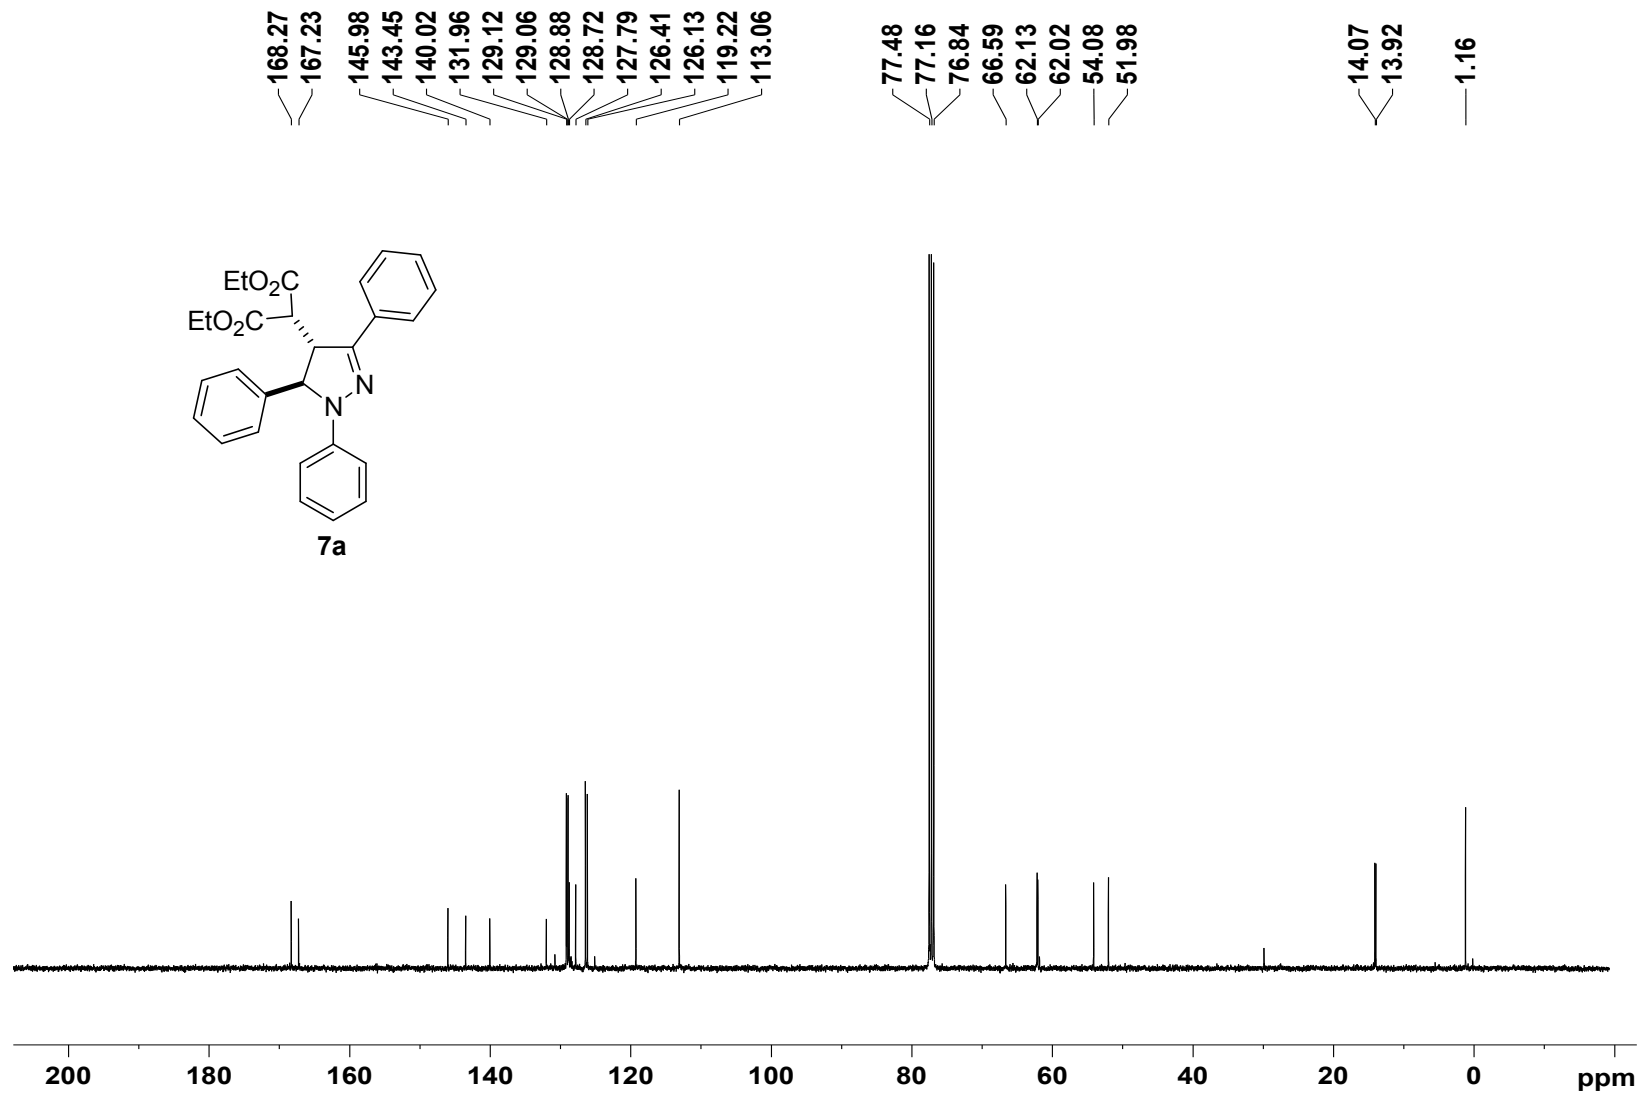

7.668  
7.649  
7.362  
7.344  
7.325  
7.289  
7.271  
7.253  
7.238  
7.218  
7.195  
7.169  
7.148  
7.130  
7.079  
7.056  
7.055  
7.035  
6.754  
6.736  
6.718  
5.553  
4.194  
4.185  
4.177  
4.168  
4.159  
4.150  
4.132  
4.074  
4.056  
4.038  
4.029  
4.026  
4.020  
4.012  
3.994  
3.976  
3.928  
3.910  
3.901  
3.892  
3.883  
3.875  
3.865  
3.806  
3.794  
2.257  
1.210  
1.192  
1.174  
1.071  
1.054  
1.036

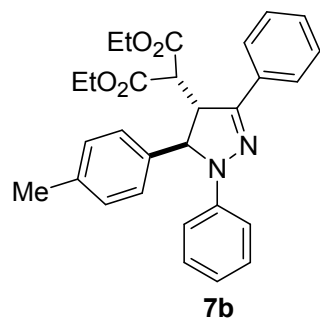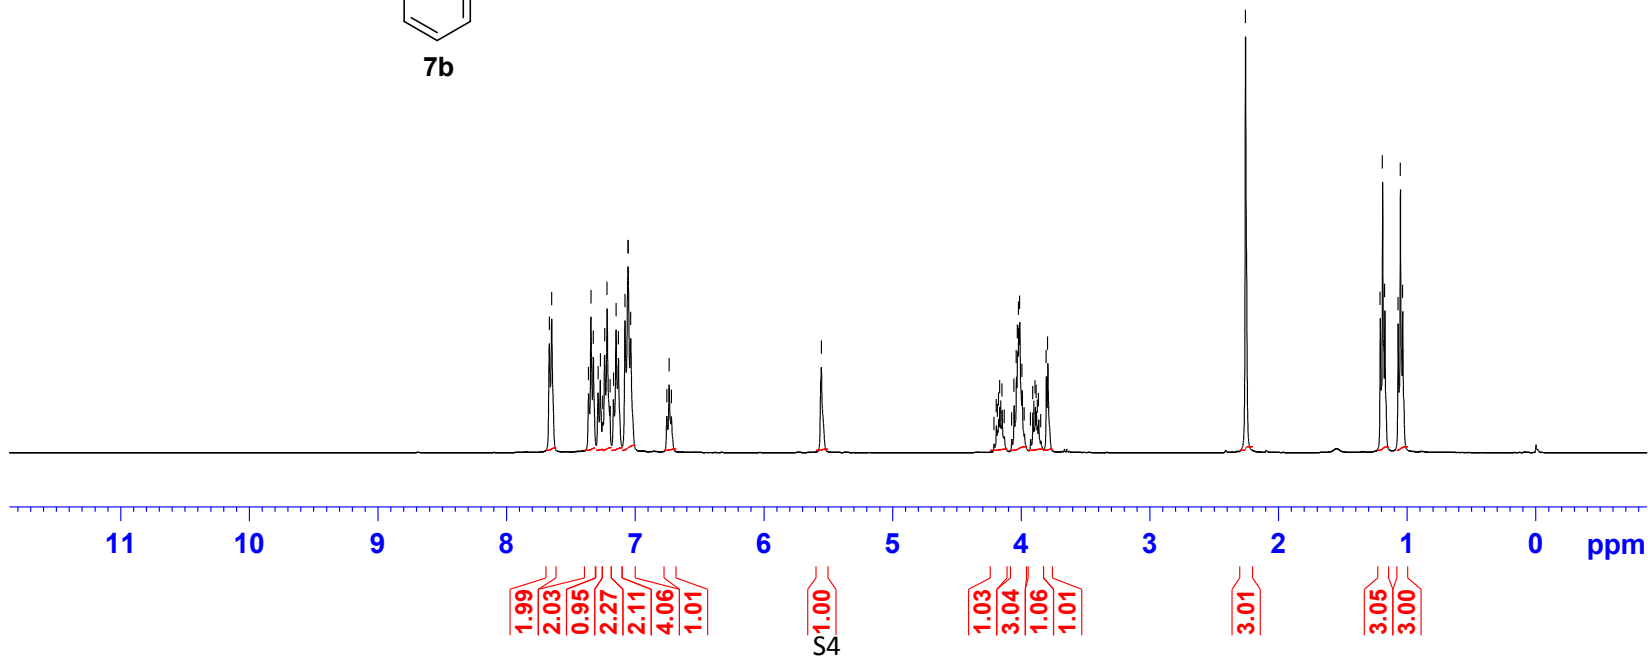

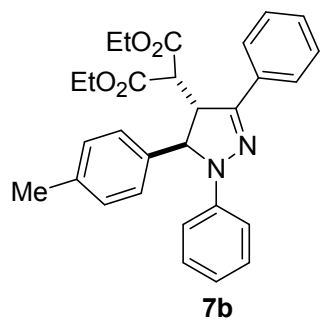

168.20  
167.18  
145.93  
143.43  
137.35  
137.00  
131.95  
129.67  
129.04  
128.80  
128.61  
126.25  
126.03  
119.10  
113.00

77.48  
77.16  
76.84  
66.37  
62.03  
61.92  
54.07  
51.92

21.16  
14.01  
13.86

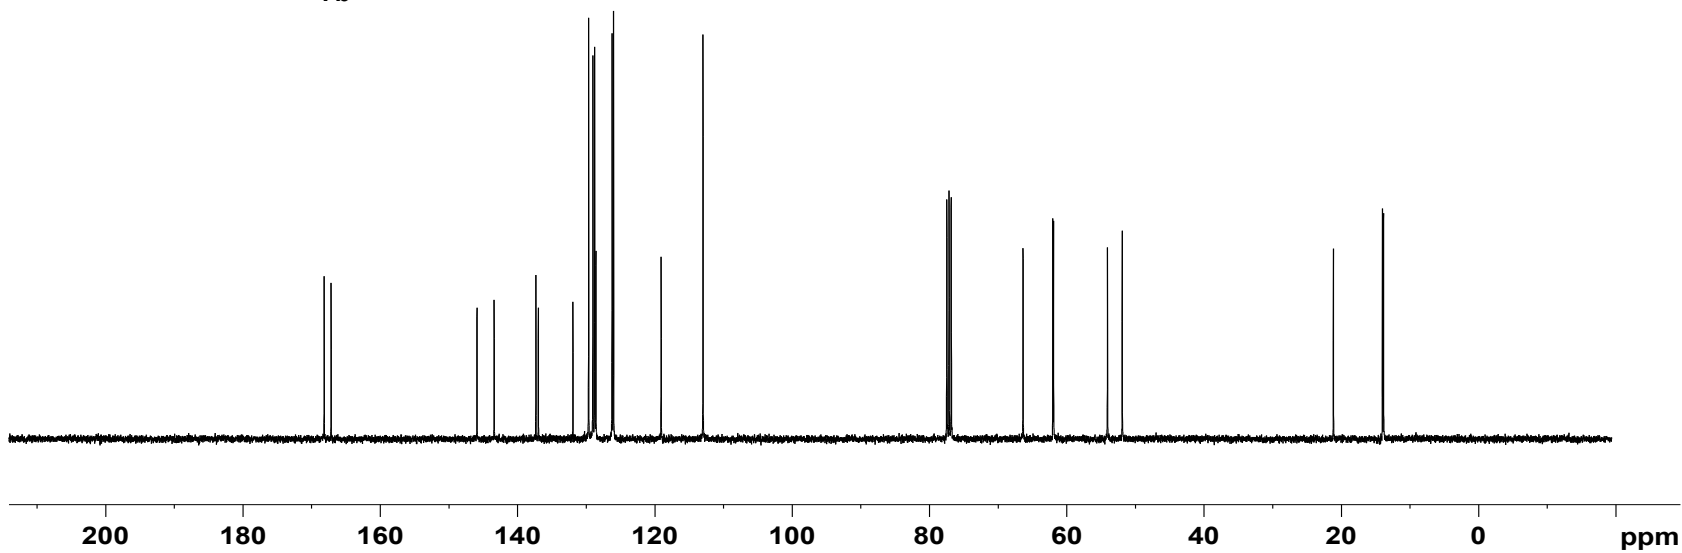

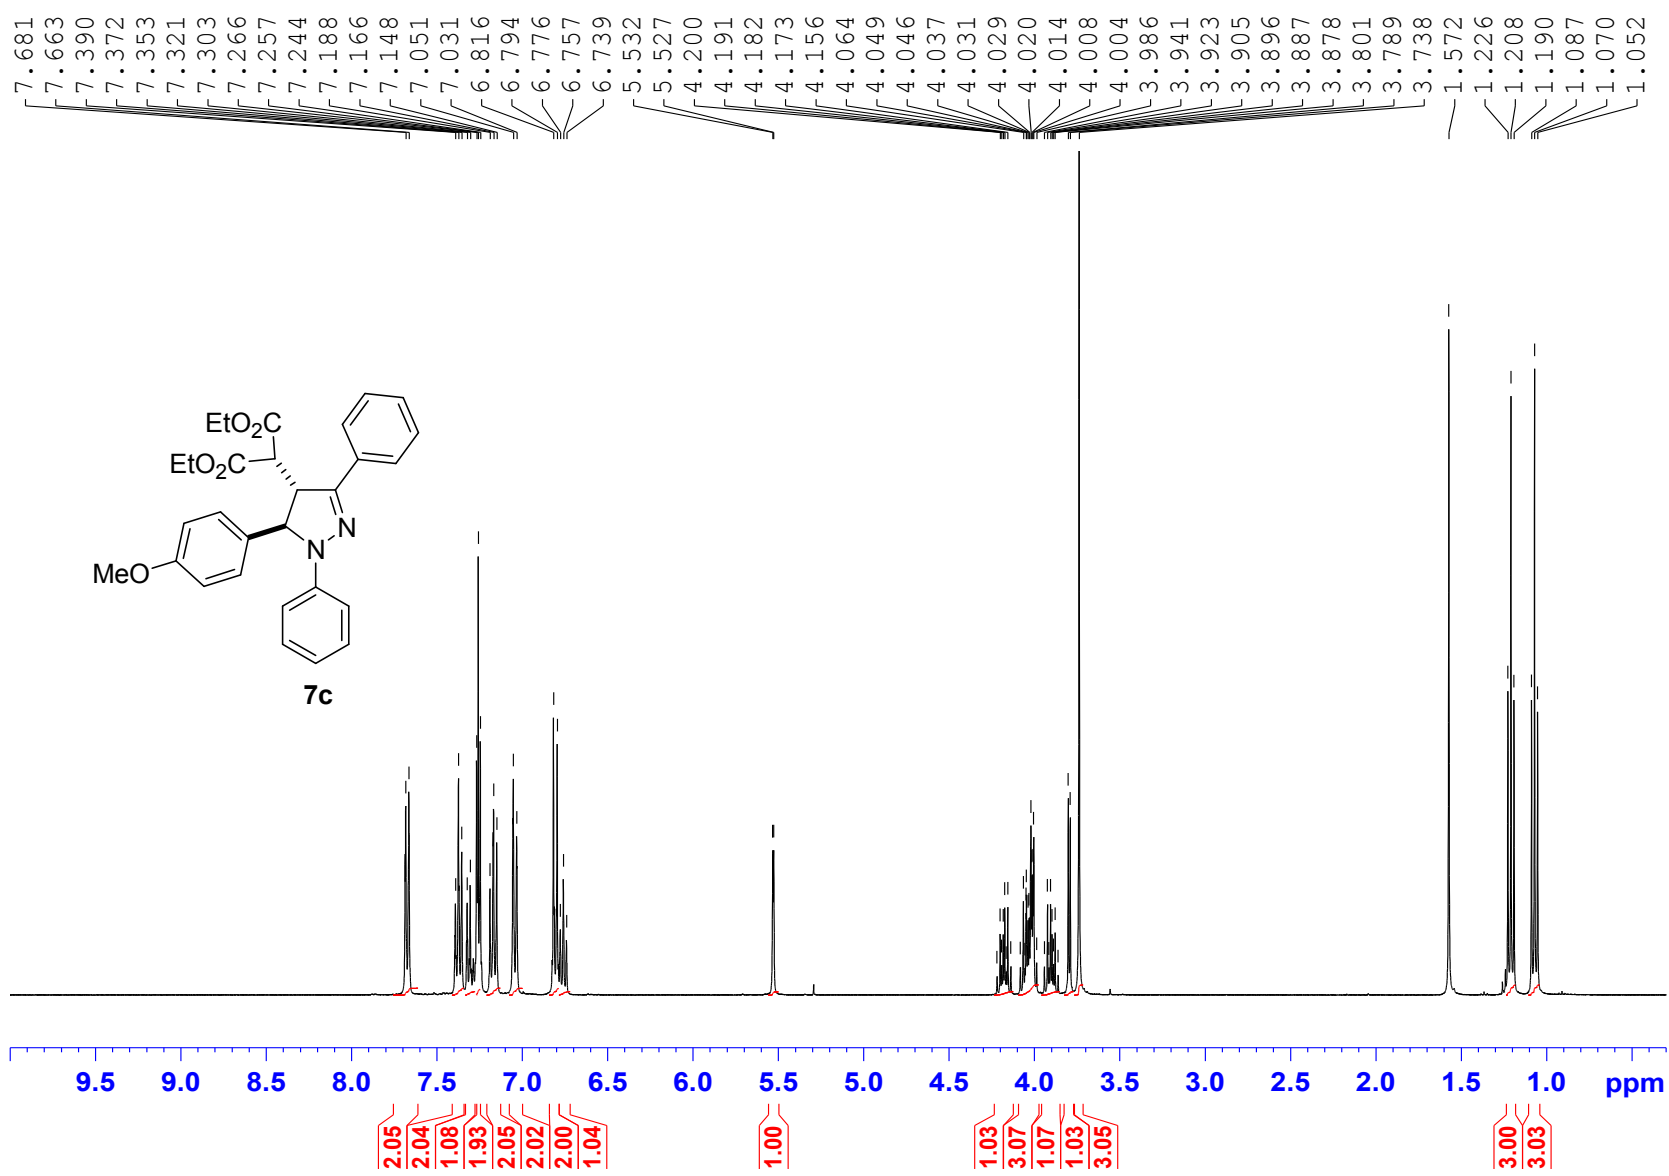

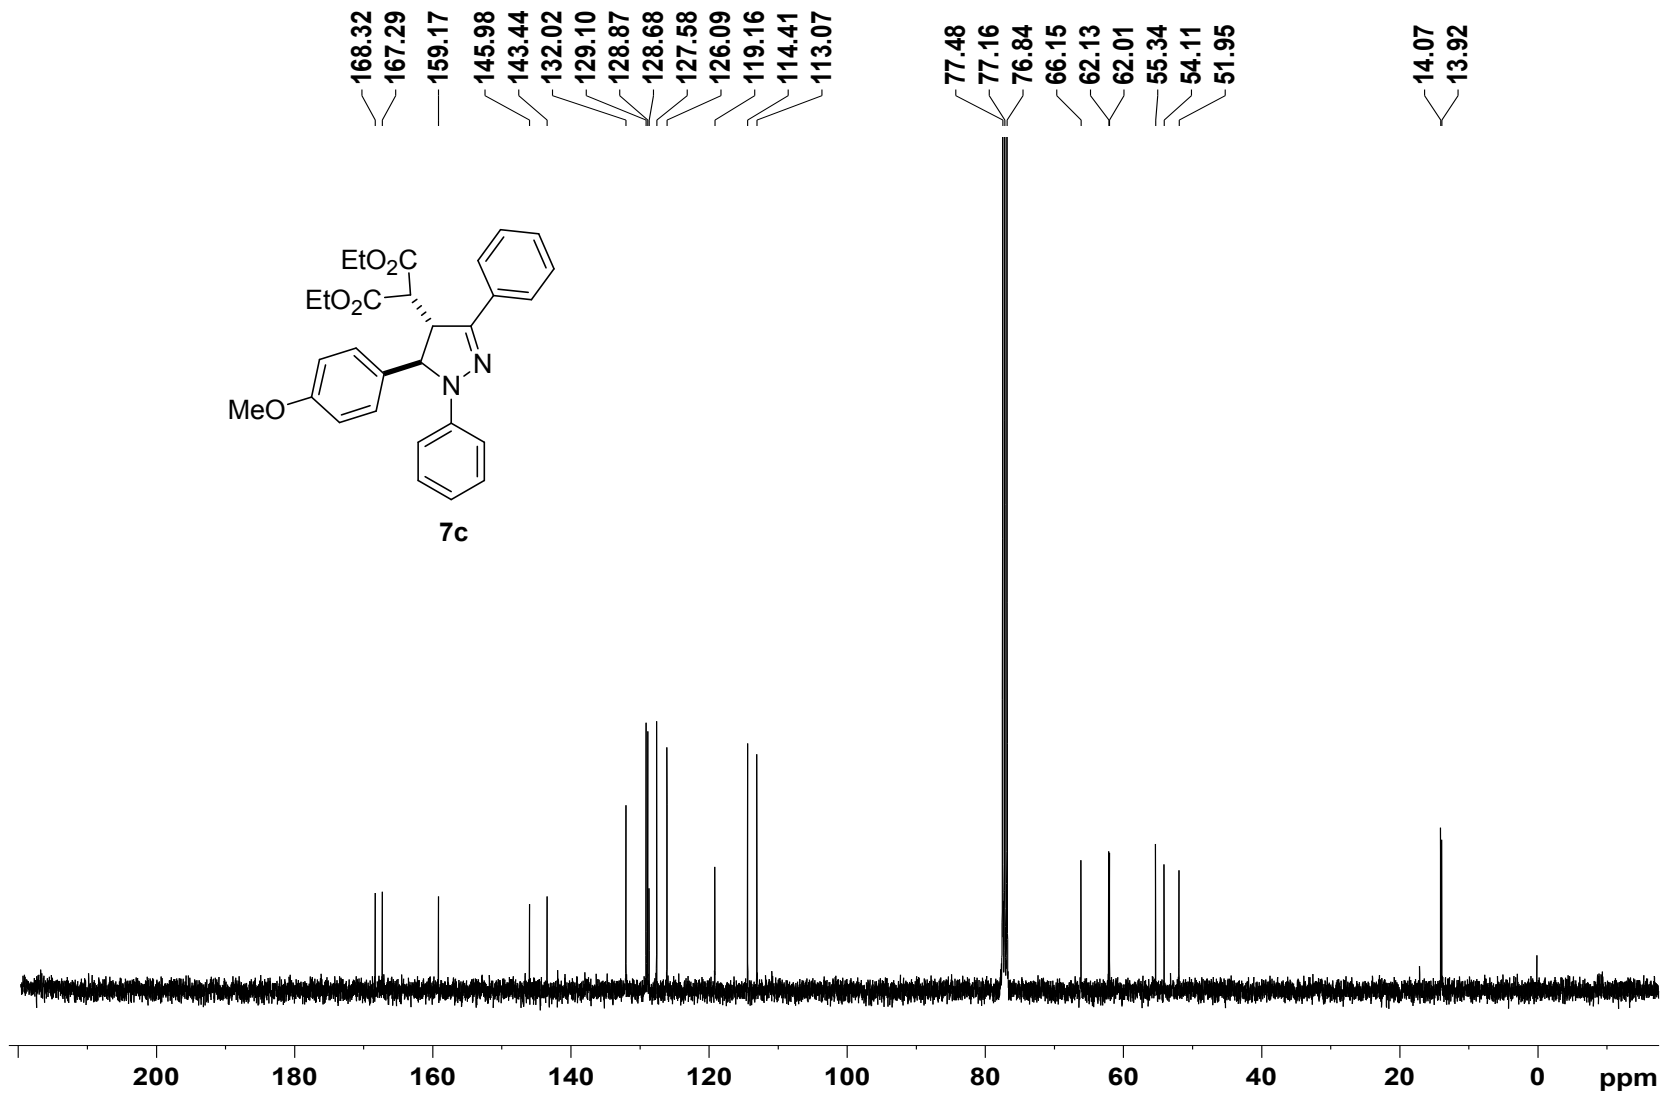

7.672  
7.654  
7.396  
7.378  
7.359  
7.333  
7.312  
7.295  
7.290  
7.249  
7.238  
7.234  
7.196  
7.174  
7.156  
7.023  
7.003  
6.795  
6.777  
6.759  
5.577  
5.572  
4.215  
4.197  
4.188  
4.180  
4.170  
4.153  
4.082  
4.064  
4.056  
4.044  
4.037  
4.026  
4.017  
4.008  
3.999  
3.993  
3.987  
3.982  
3.910  
3.901  
3.892  
3.883  
3.874  
3.865  
3.804  
3.793  
1.235  
1.217  
1.200  
1.083  
1.065  
1.047

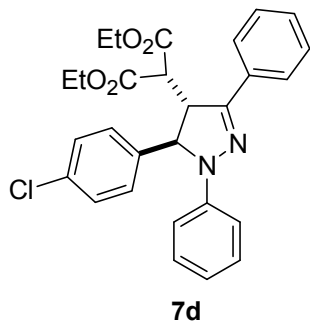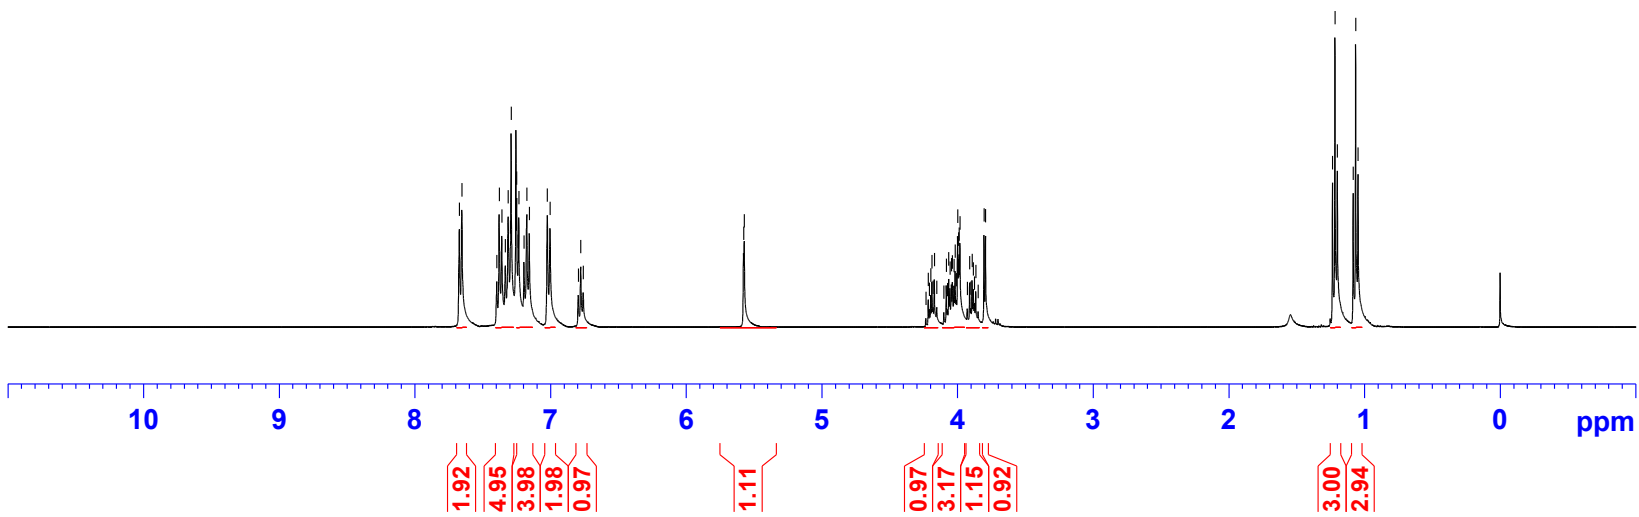



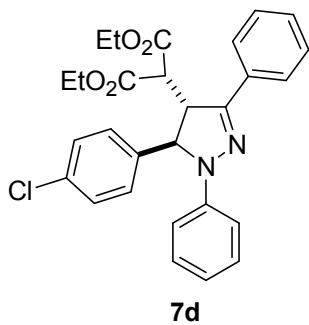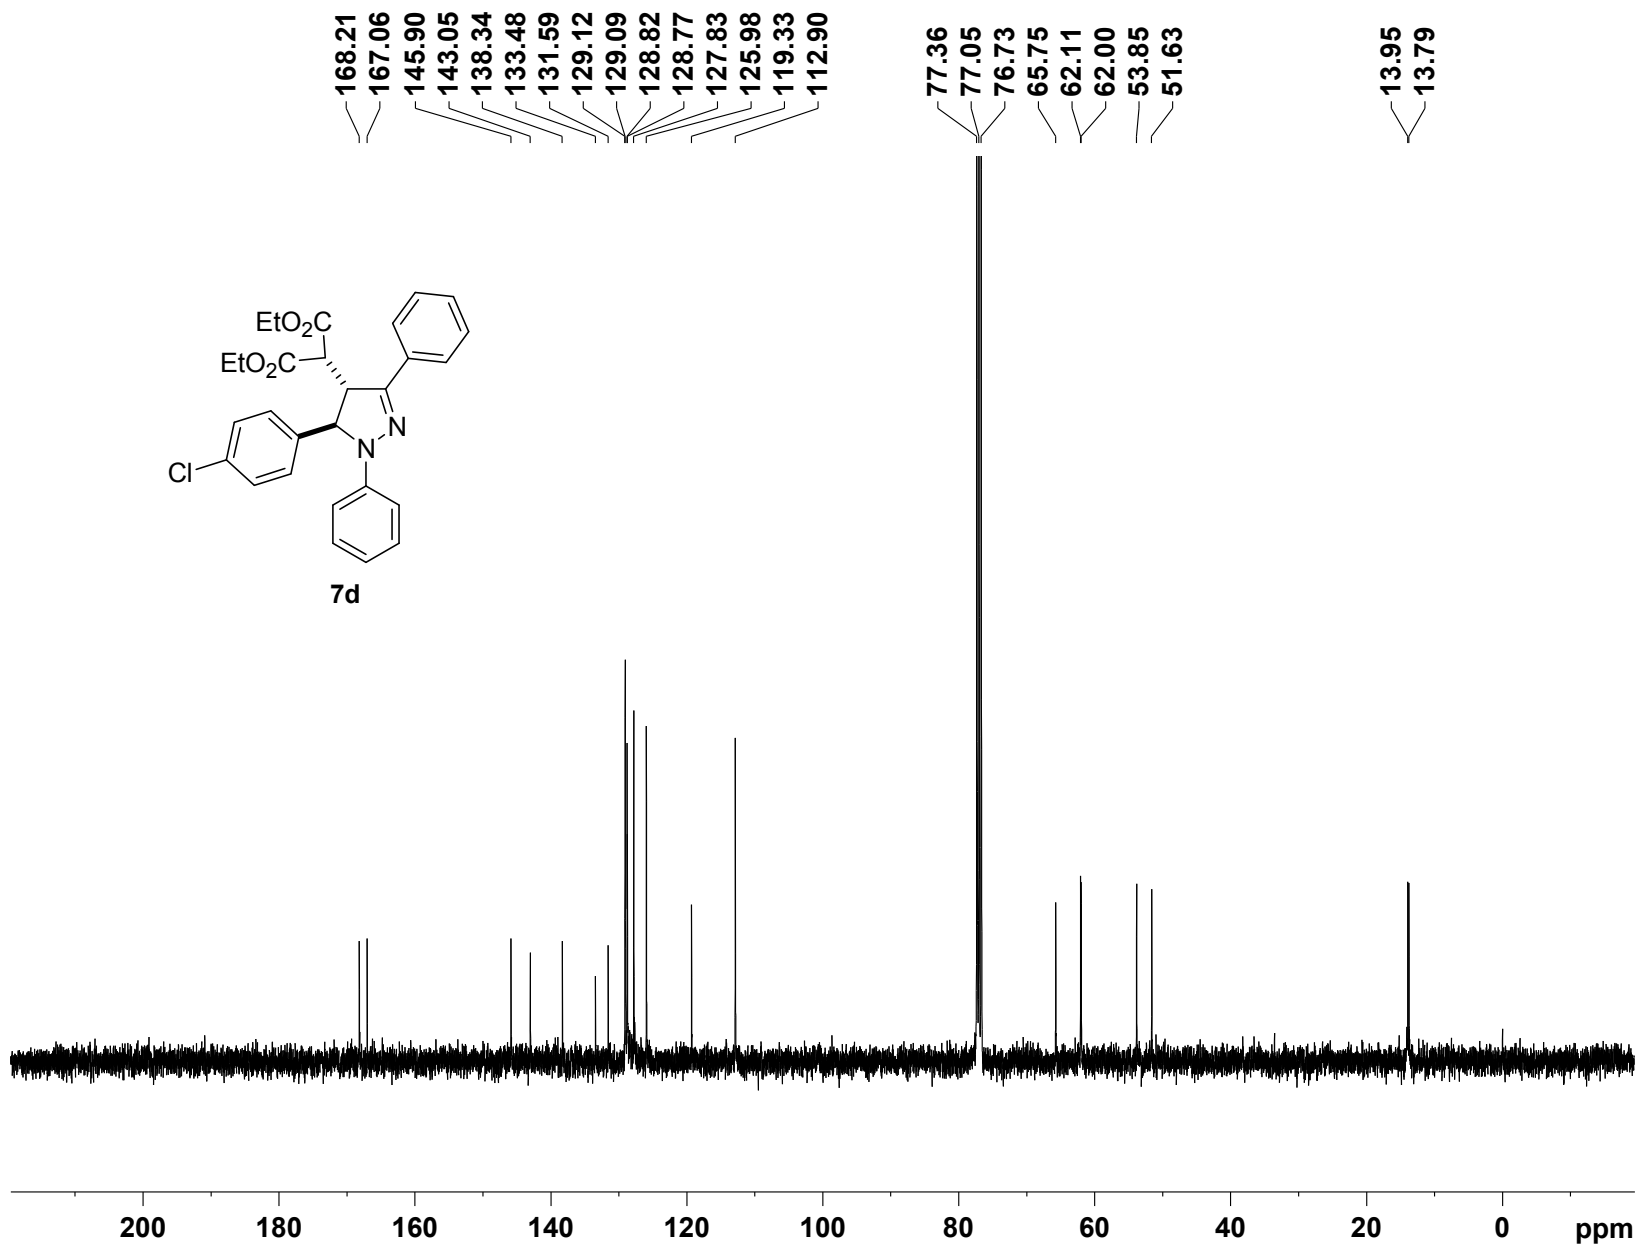

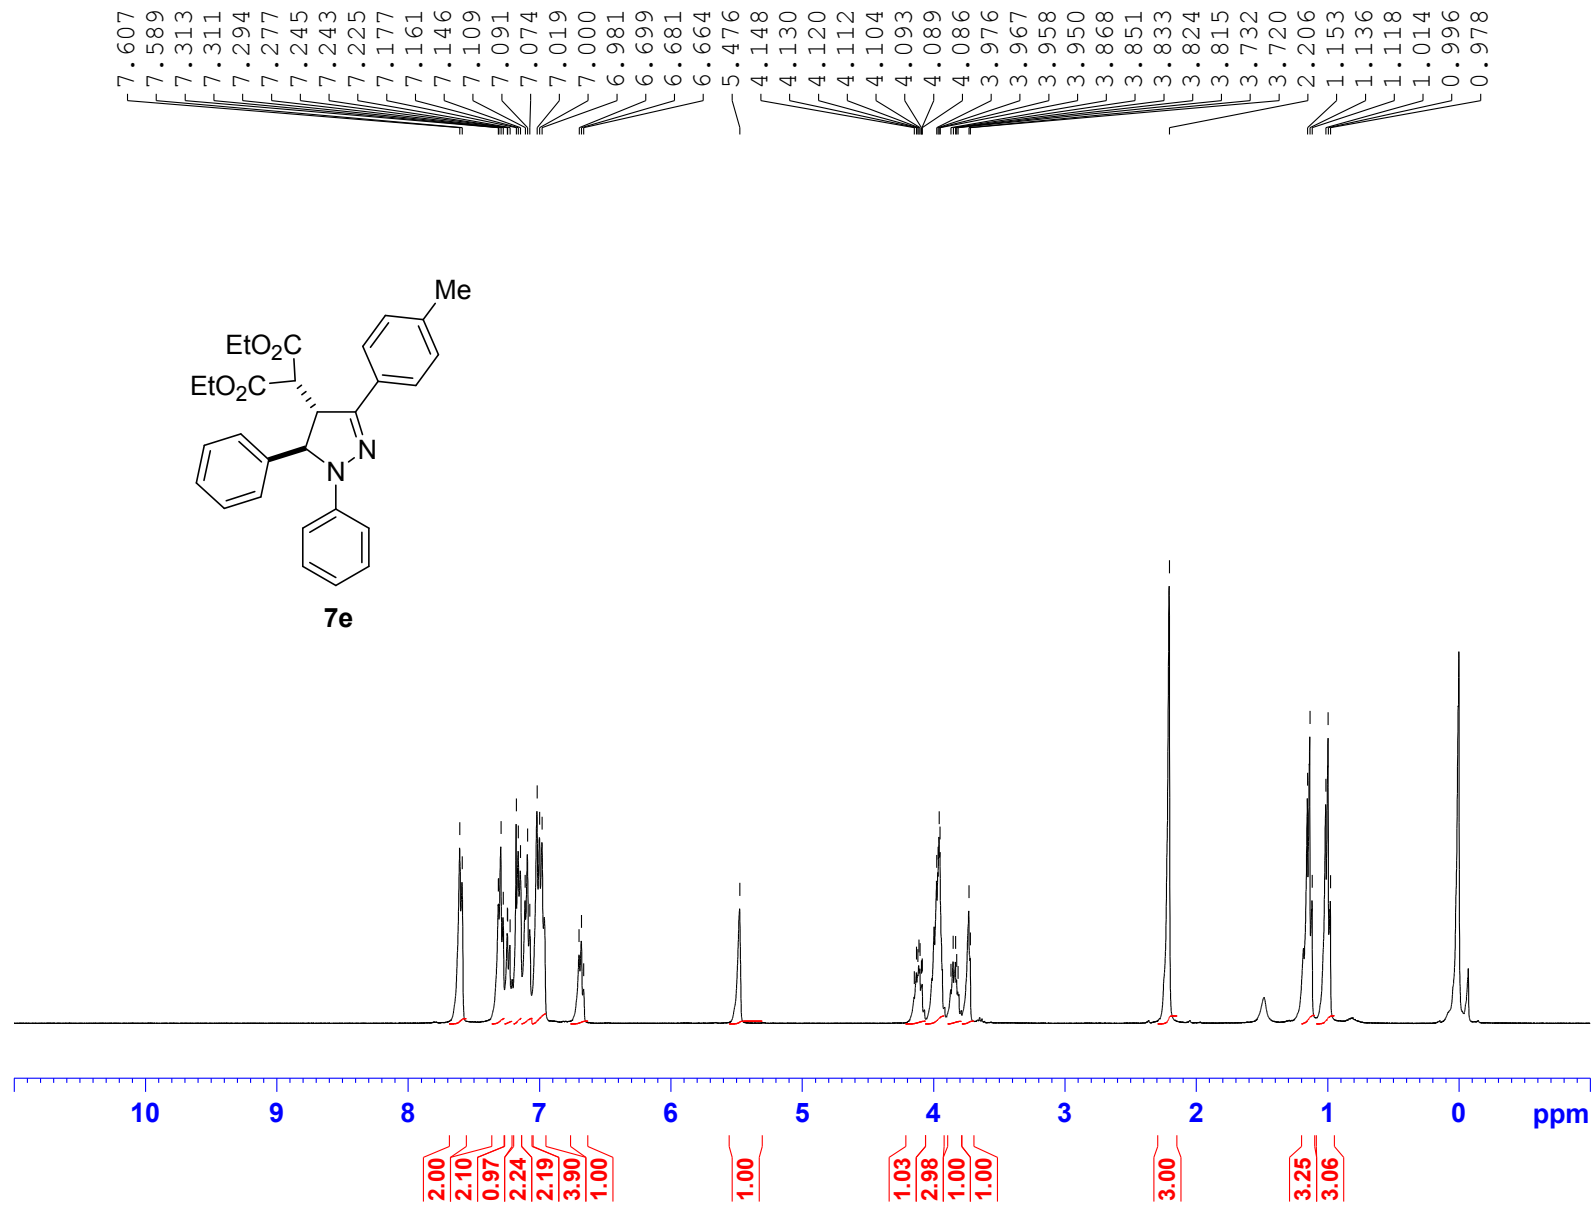

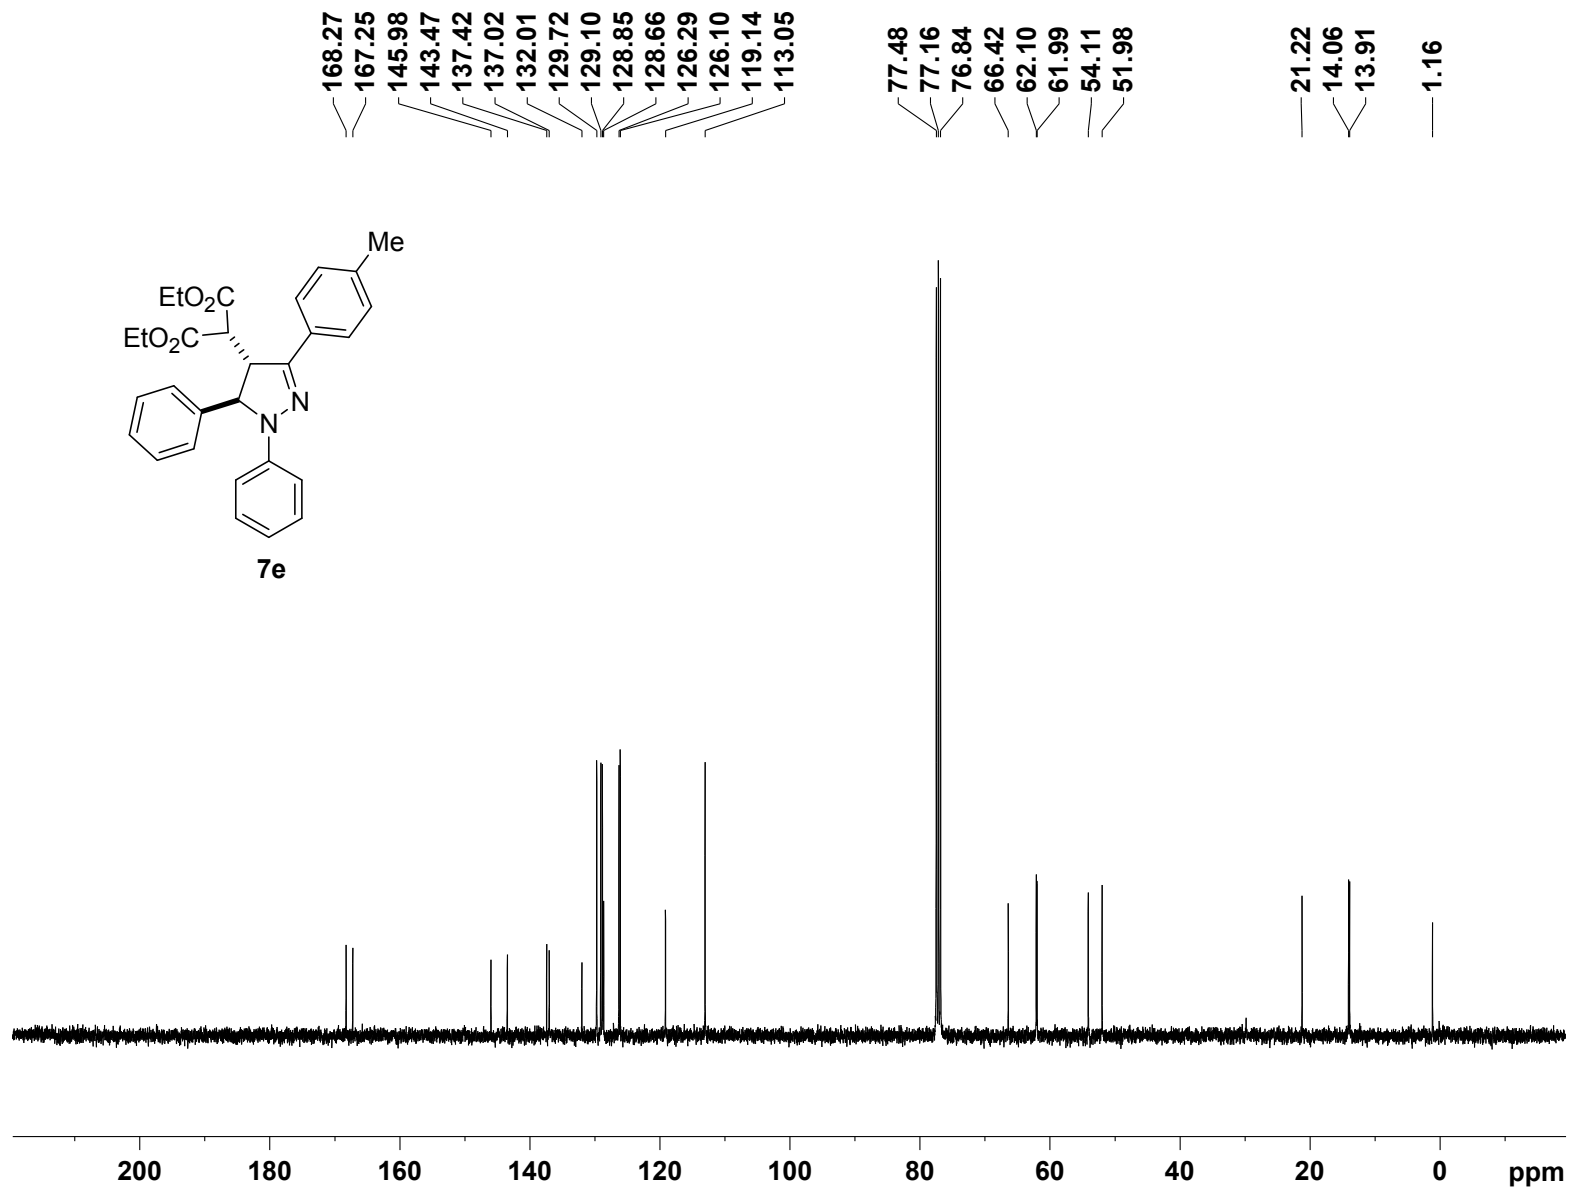

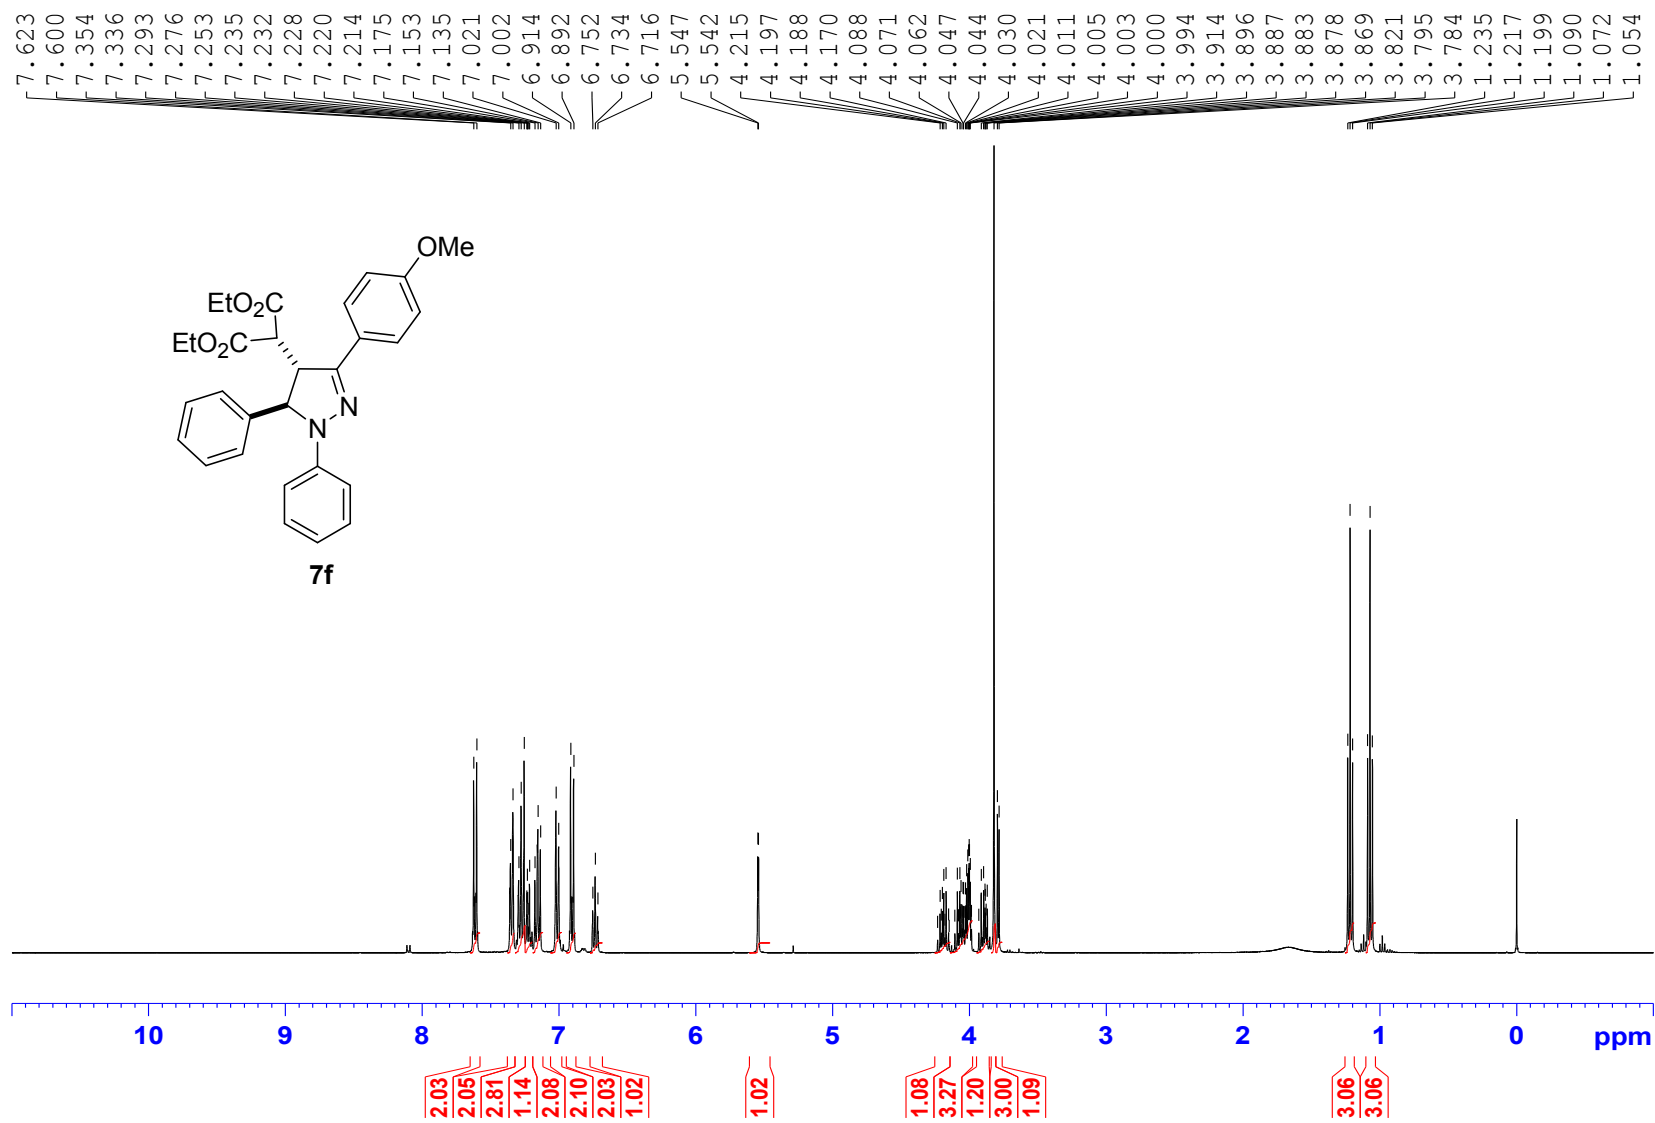

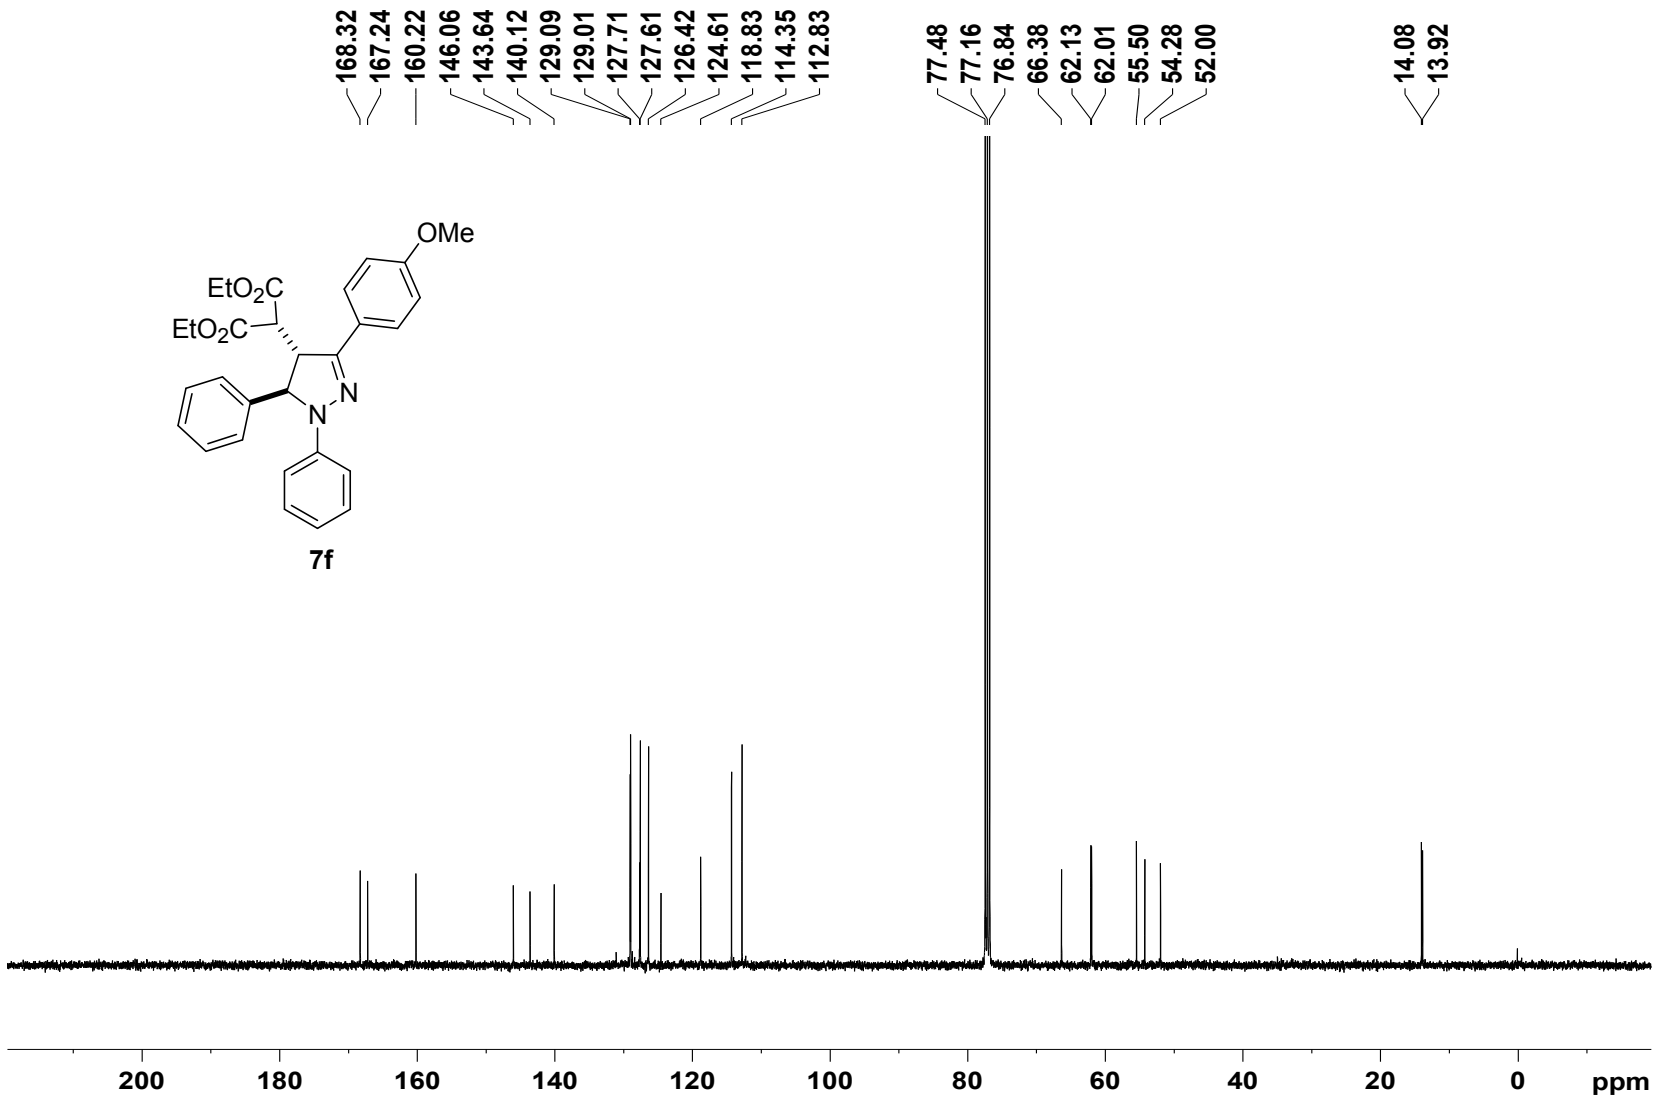

7.612  
7.591  
7.348  
7.326  
7.301  
7.284  
7.265  
7.250  
7.242  
7.225  
7.187  
7.165  
7.147  
7.038  
7.019  
6.789  
6.771  
6.753  
6.598  
5.592  
5.592  
4.228  
4.219  
4.210  
4.202  
4.184  
4.124  
4.106  
4.088  
4.079  
4.070  
4.061  
4.049  
4.043  
4.040  
4.031  
4.022  
4.004  
3.998  
3.992  
3.986  
3.936  
3.918  
3.900  
3.891  
3.882  
3.873  
3.768  
3.757  
1.242  
1.224  
1.207  
1.082  
1.064  
1.046

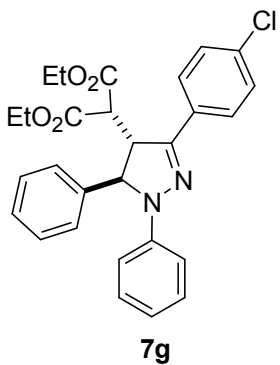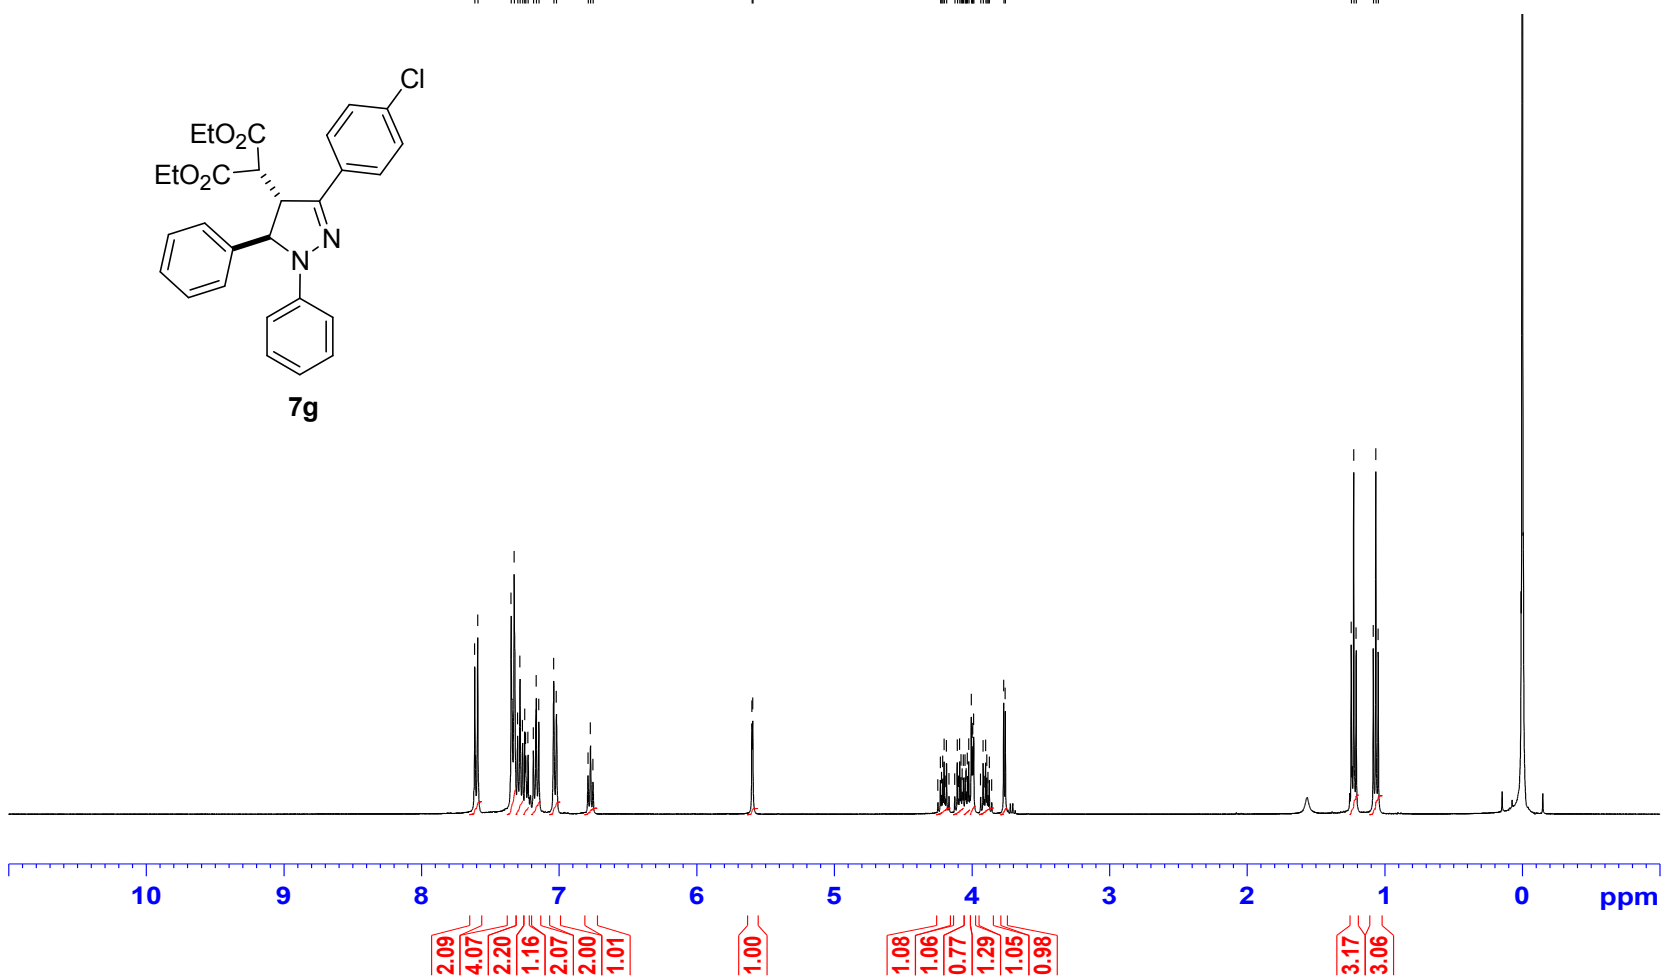

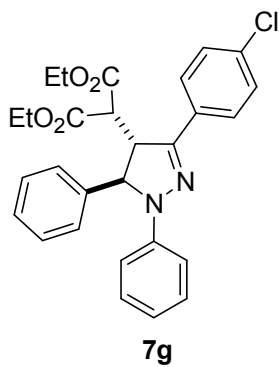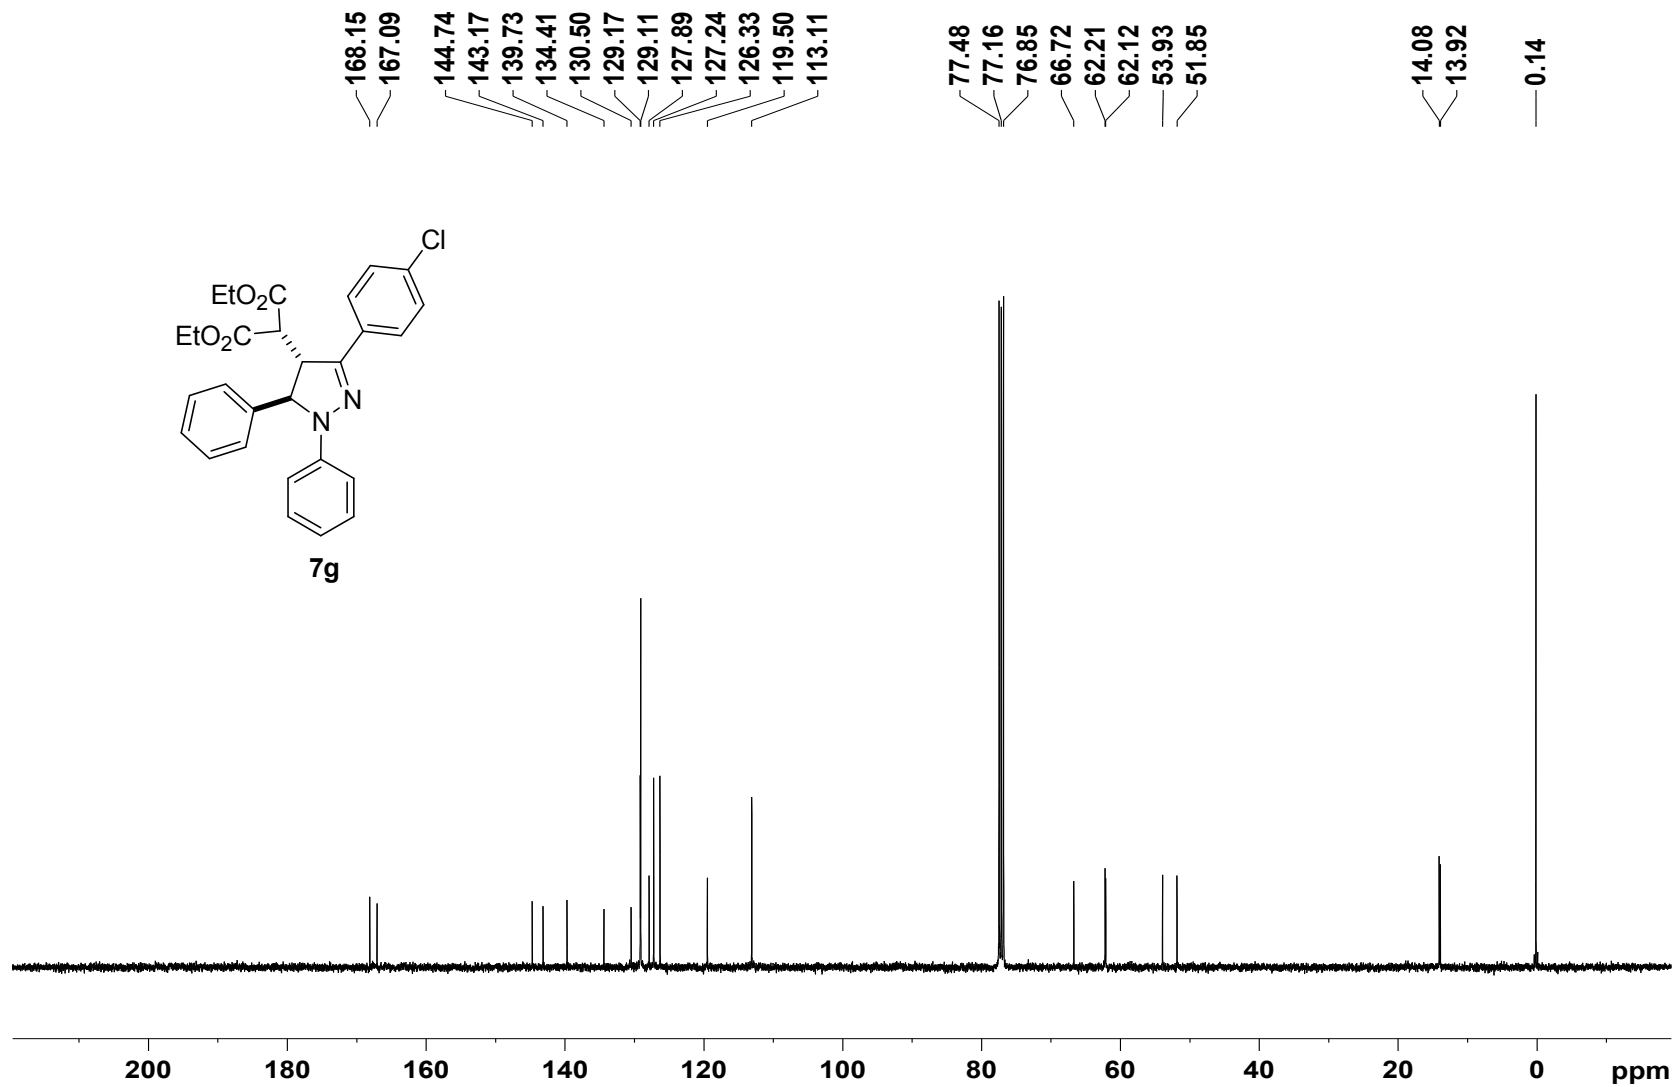

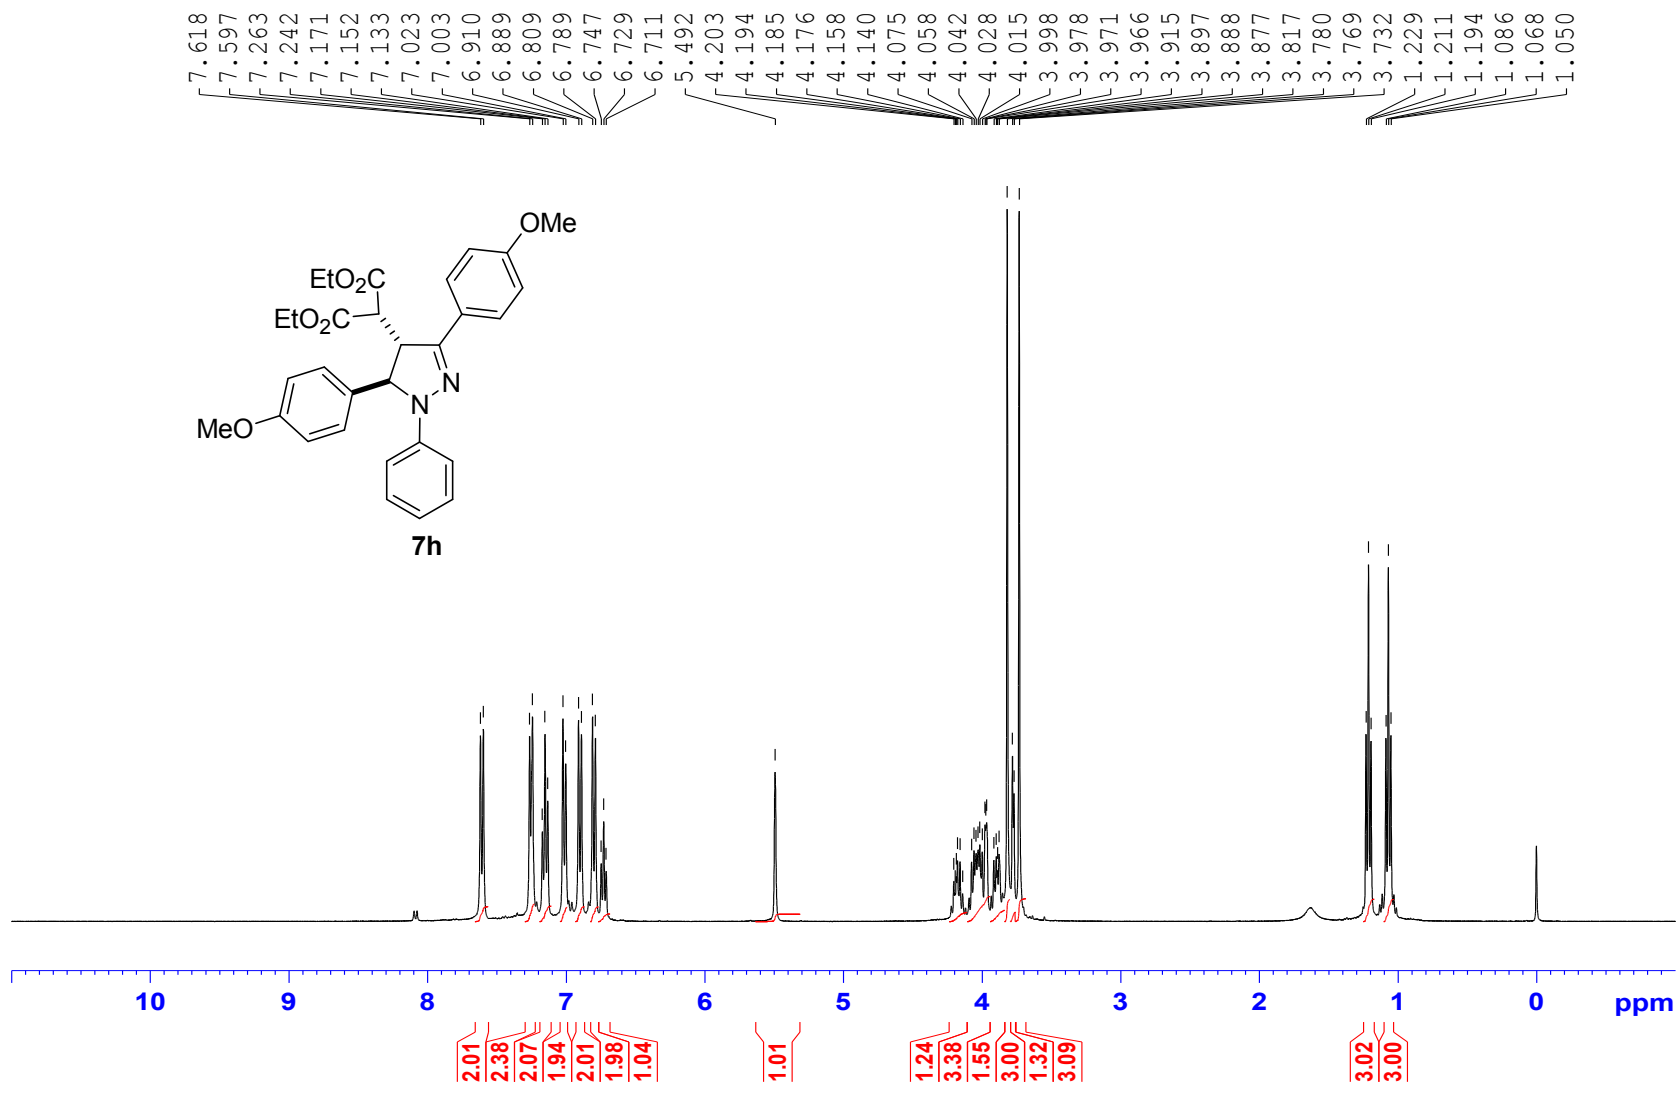



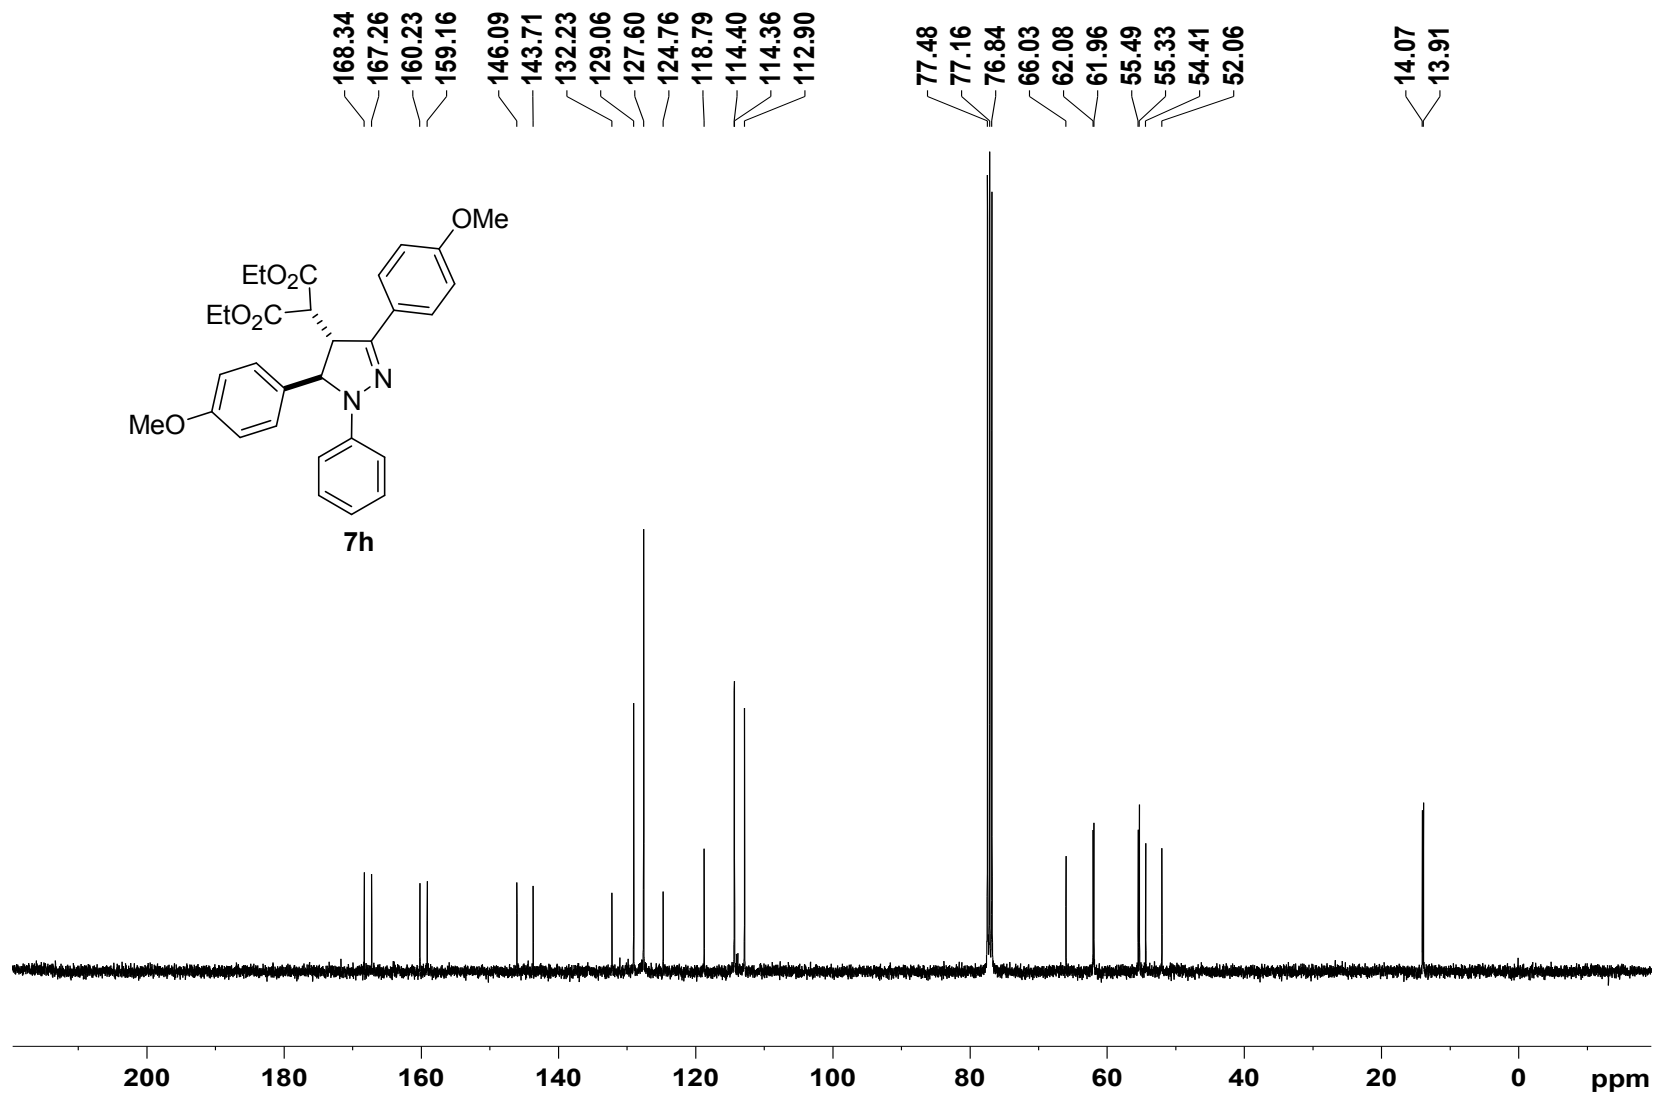

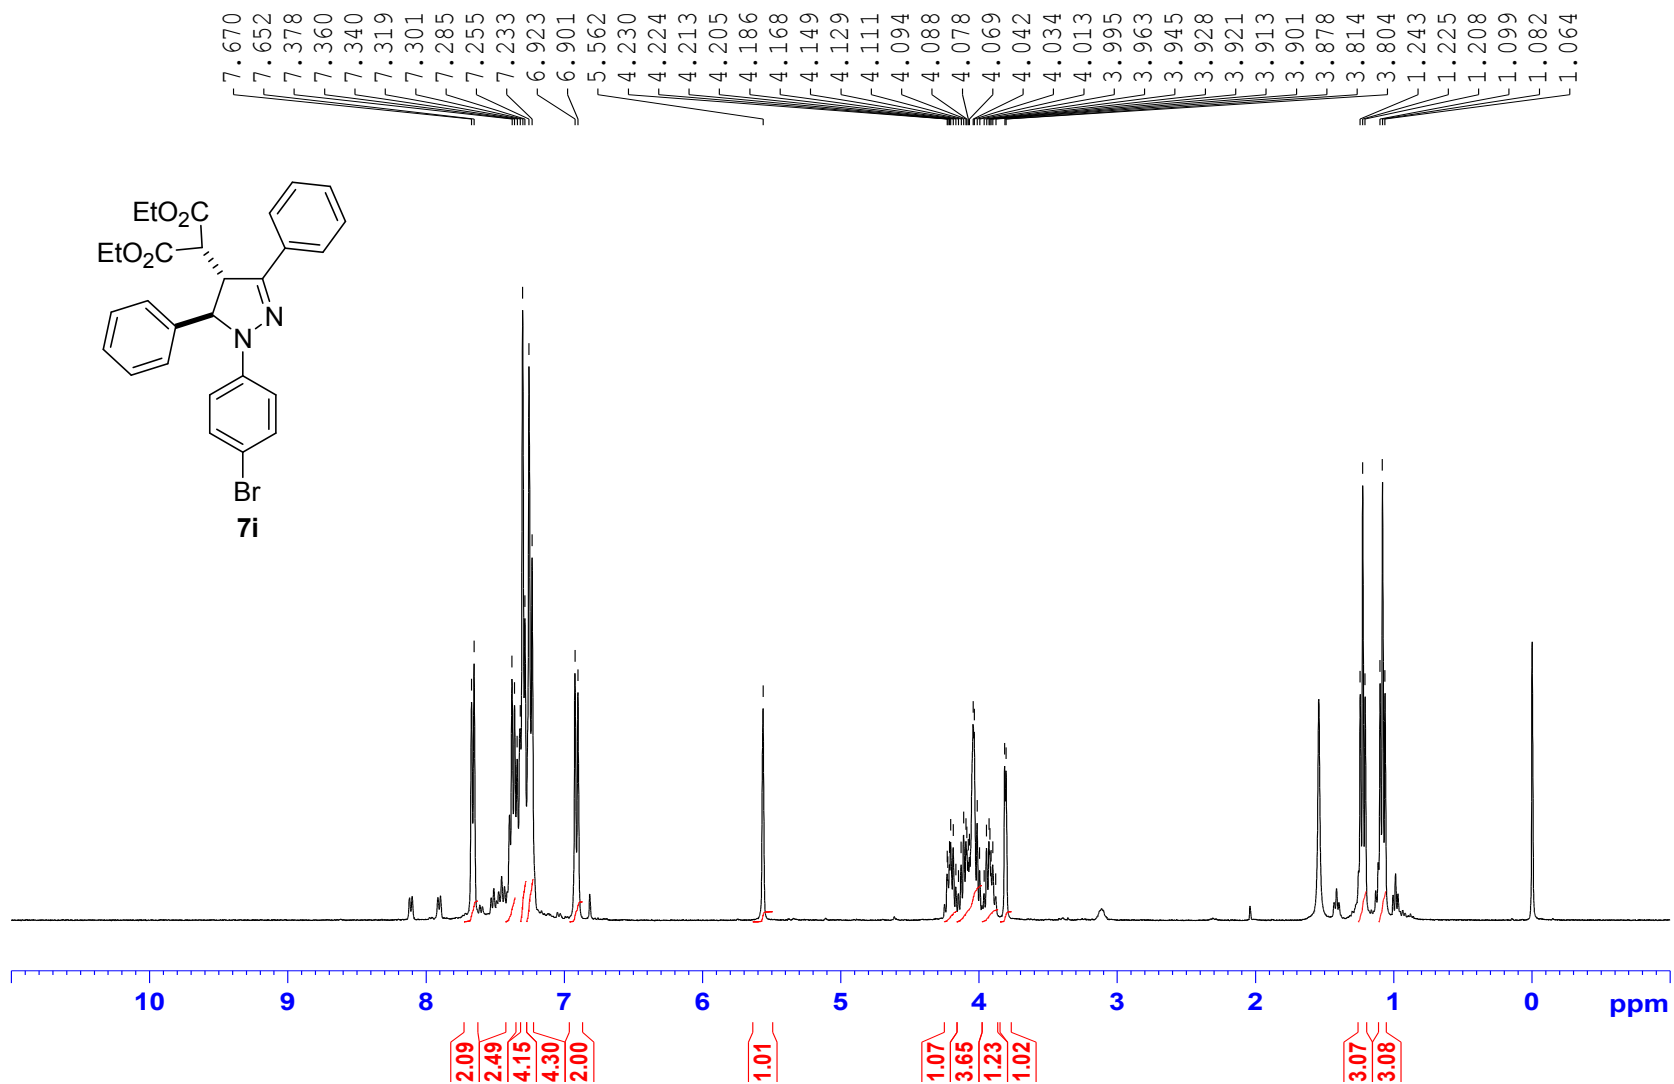

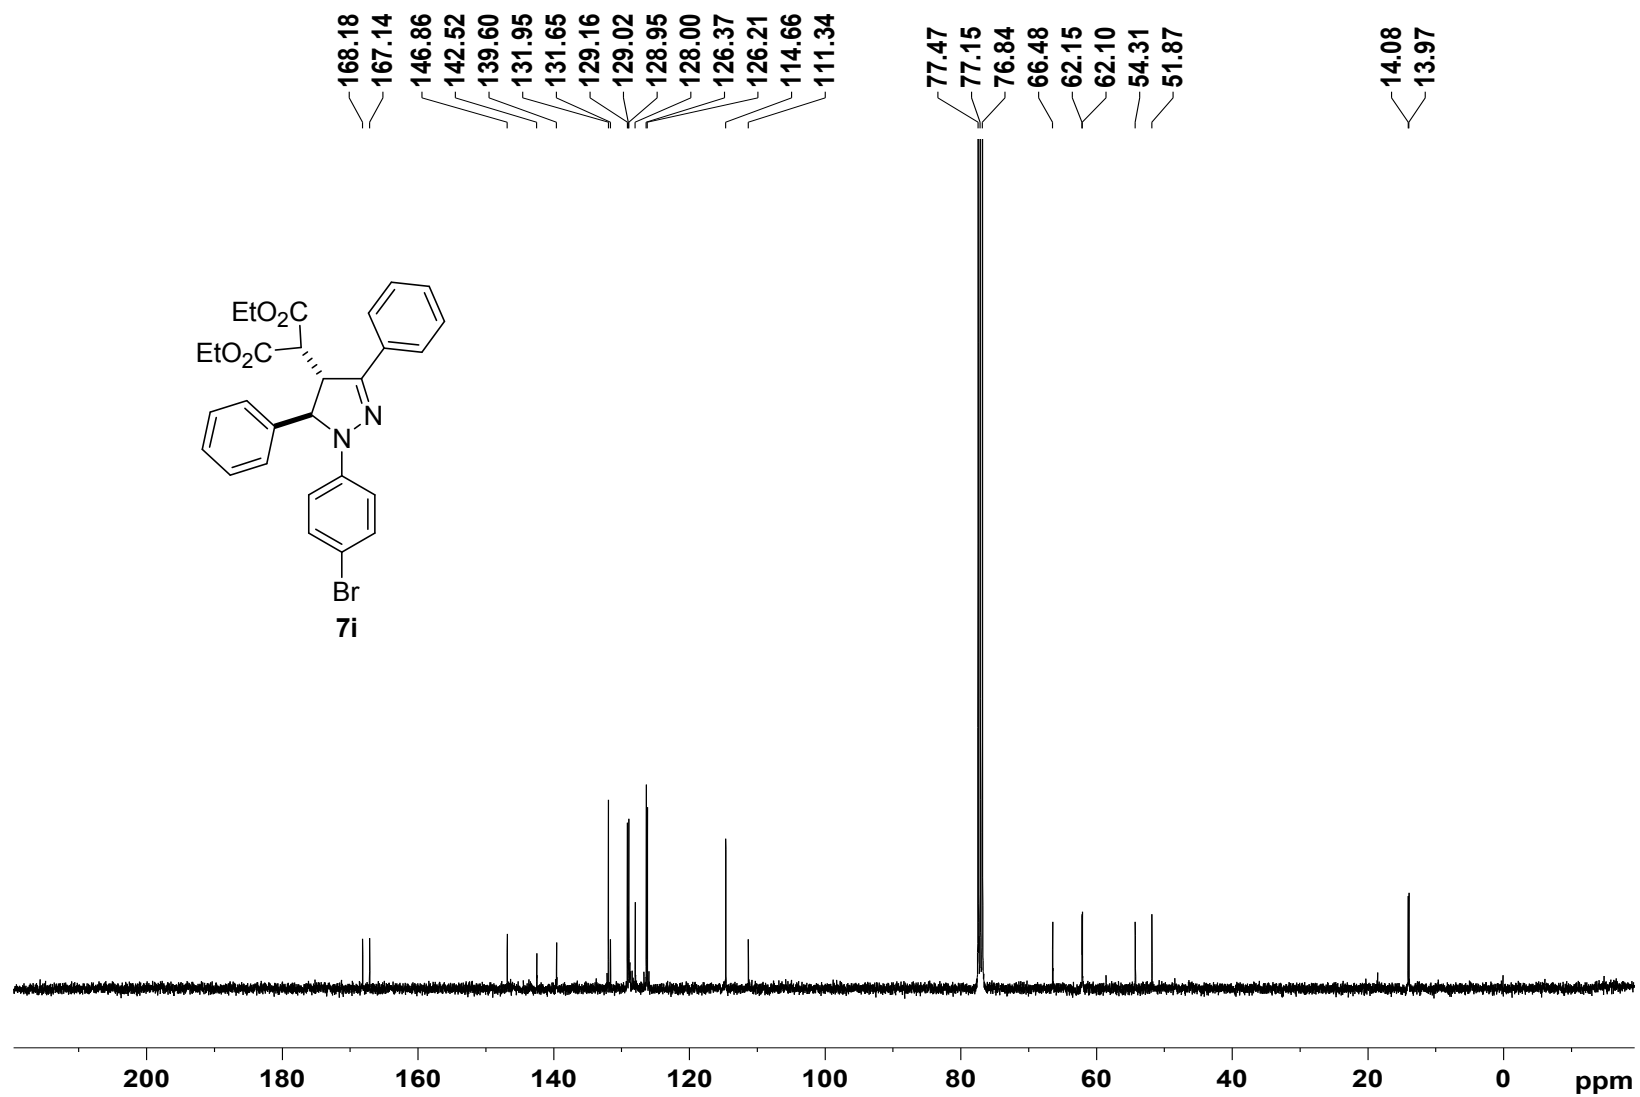

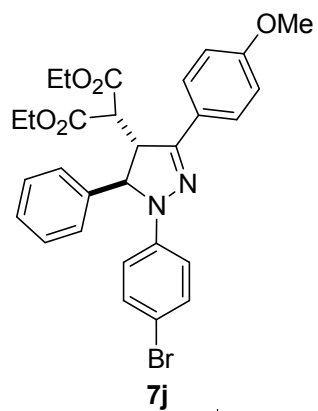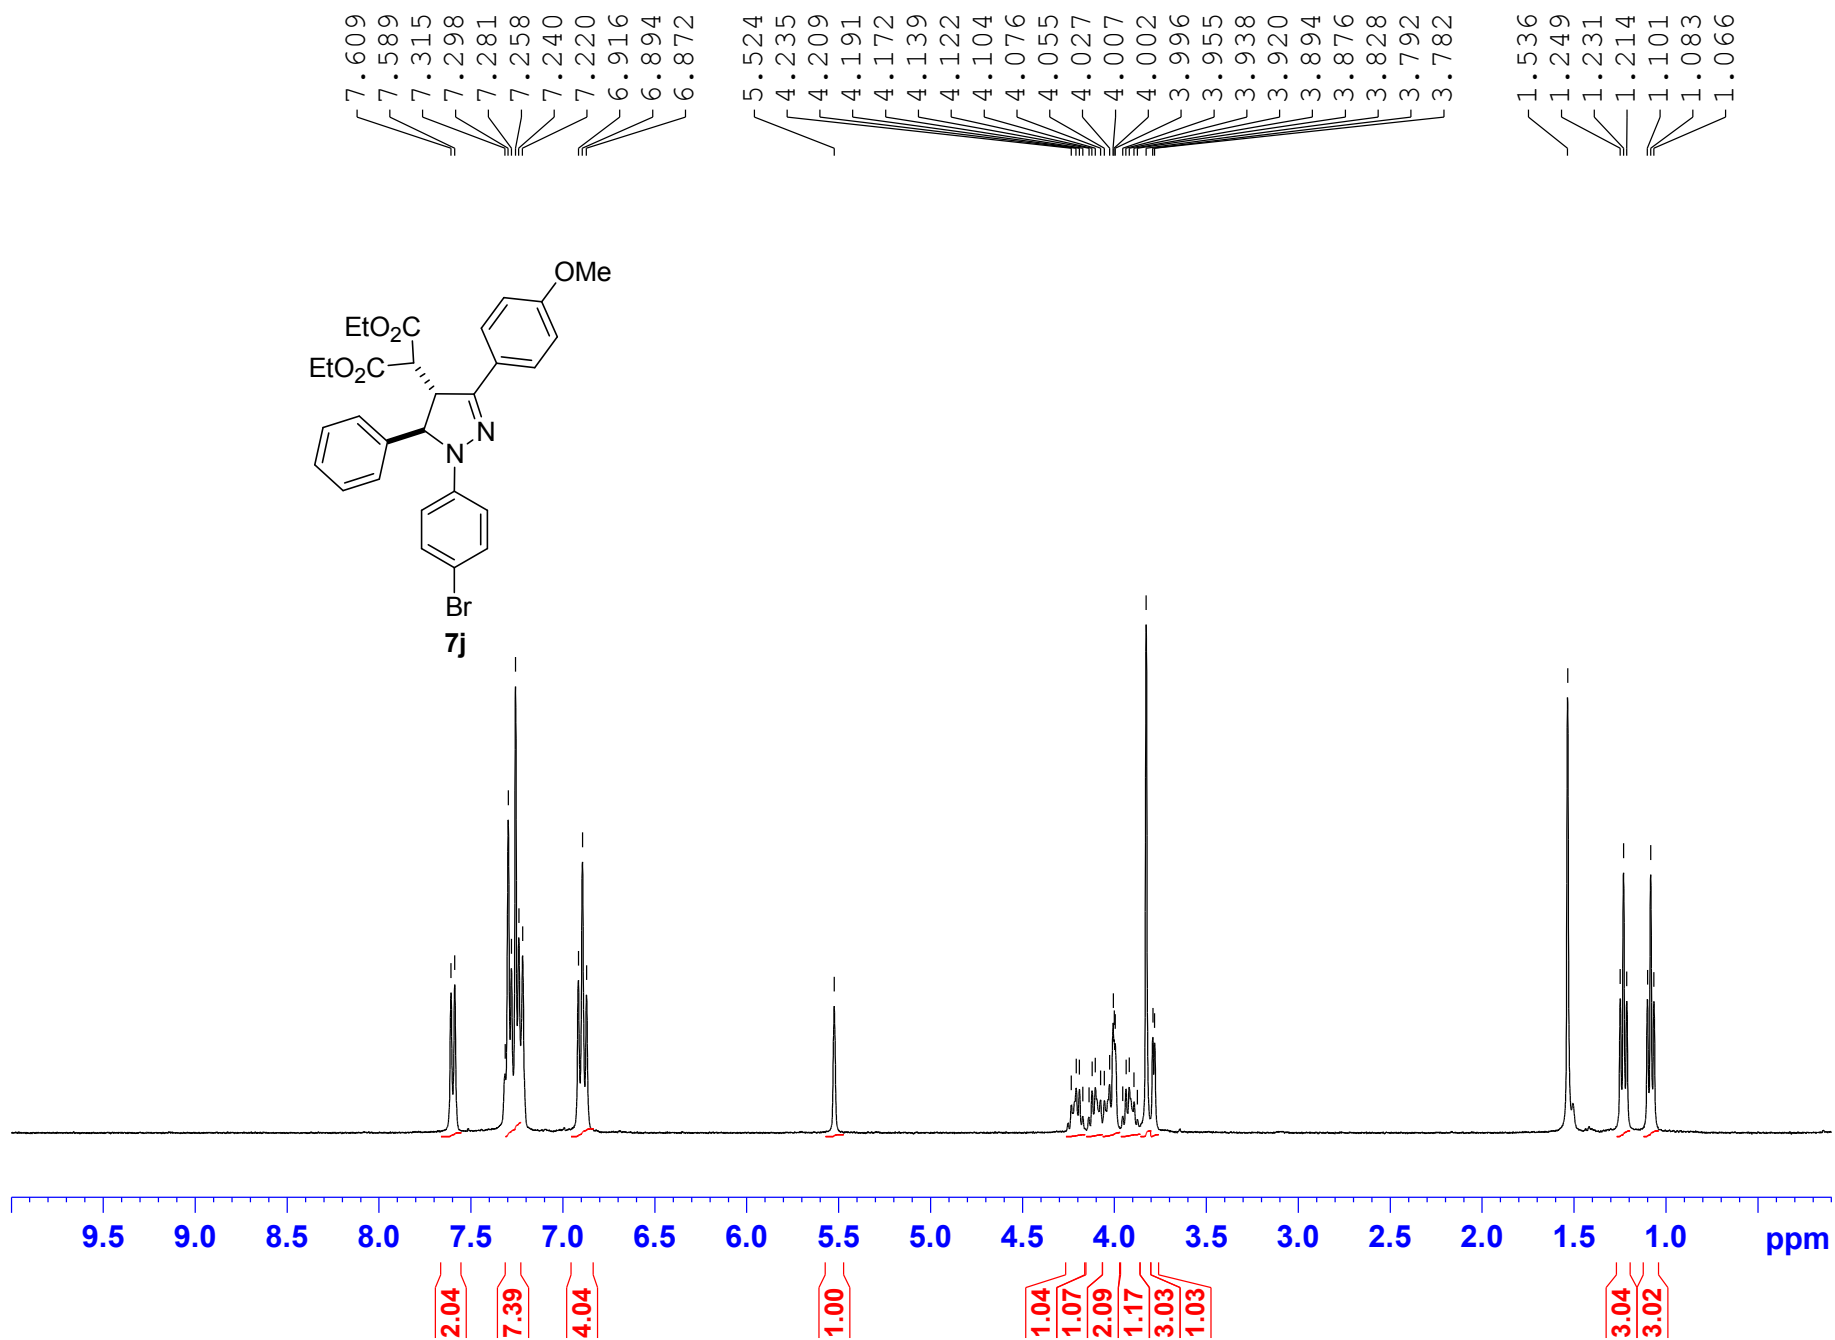

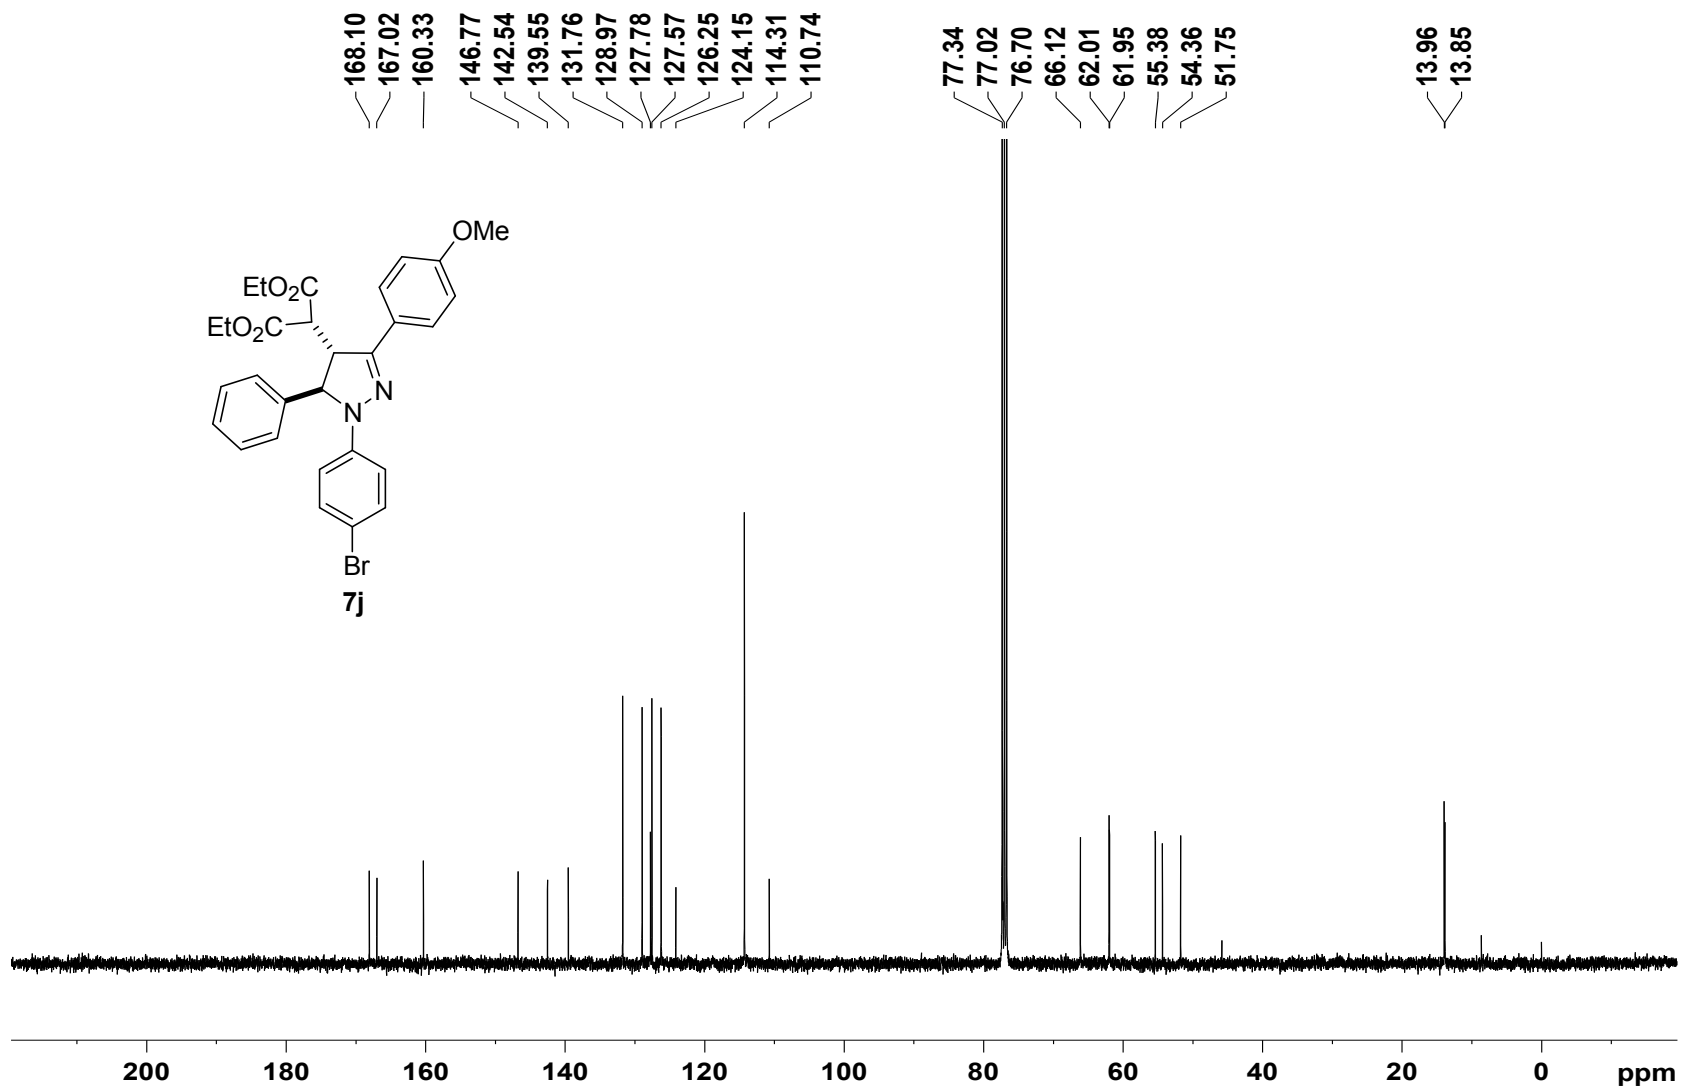

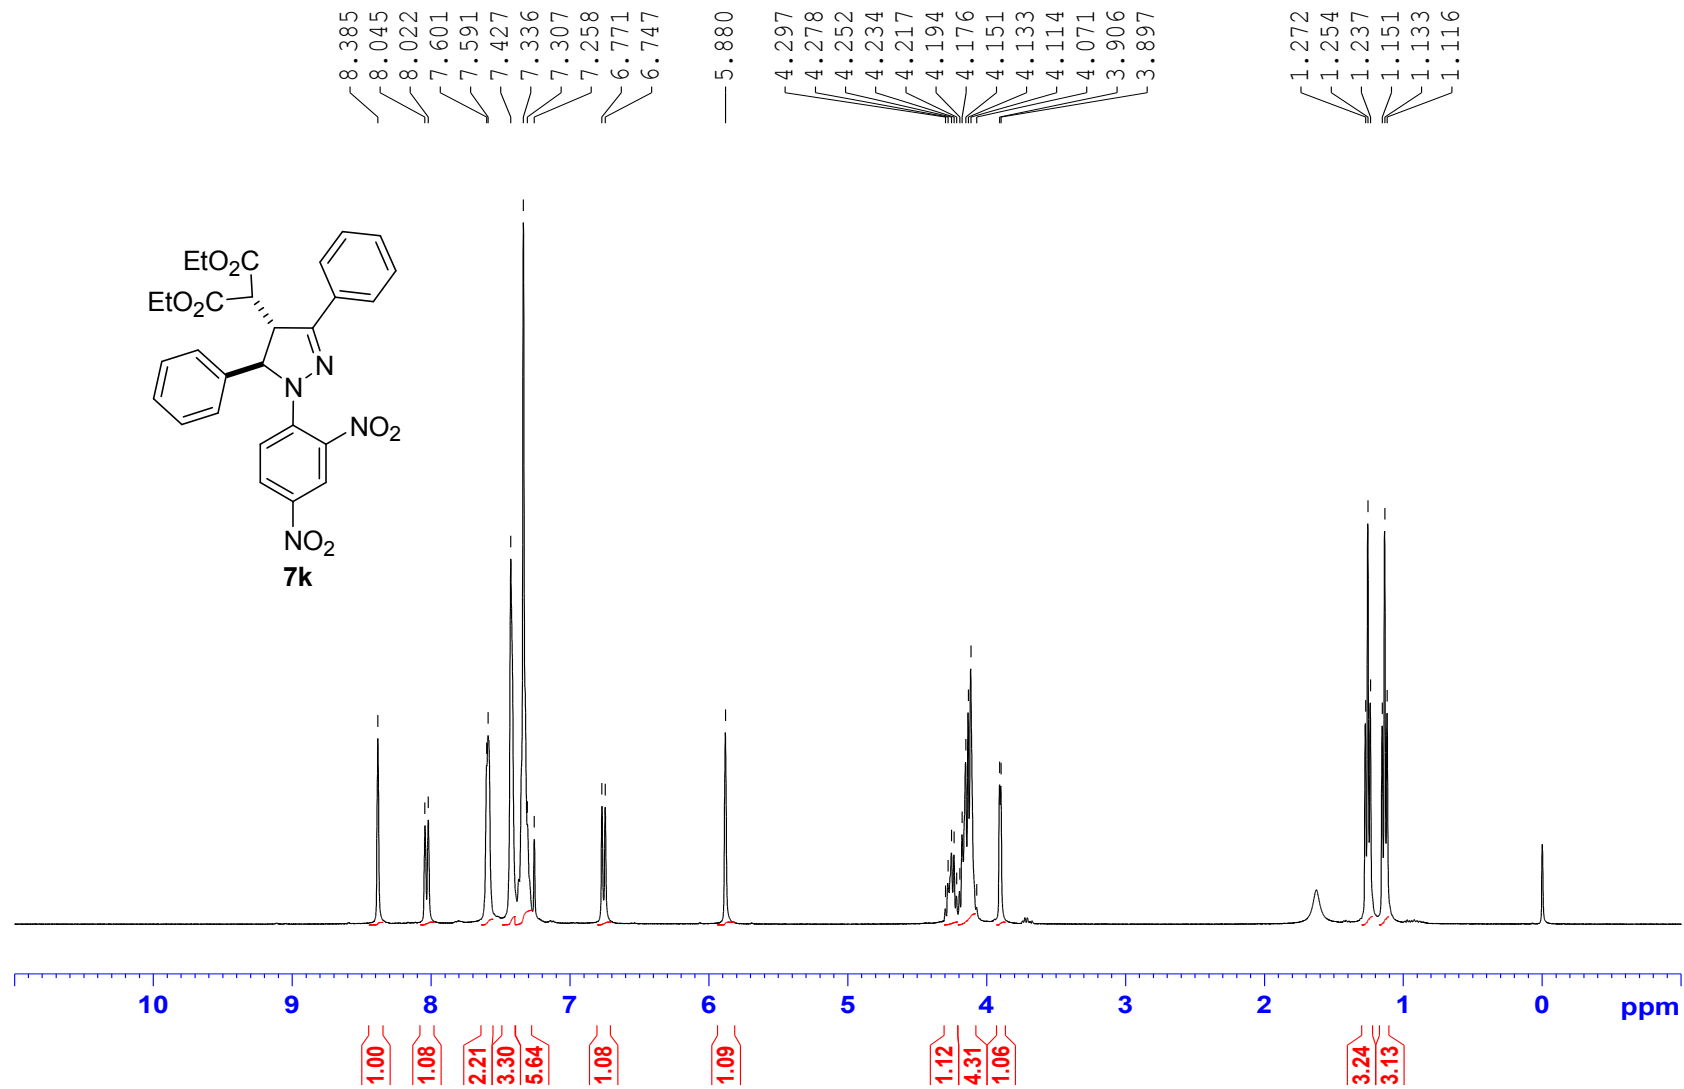

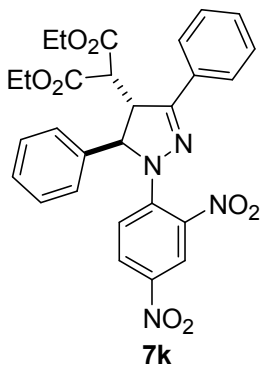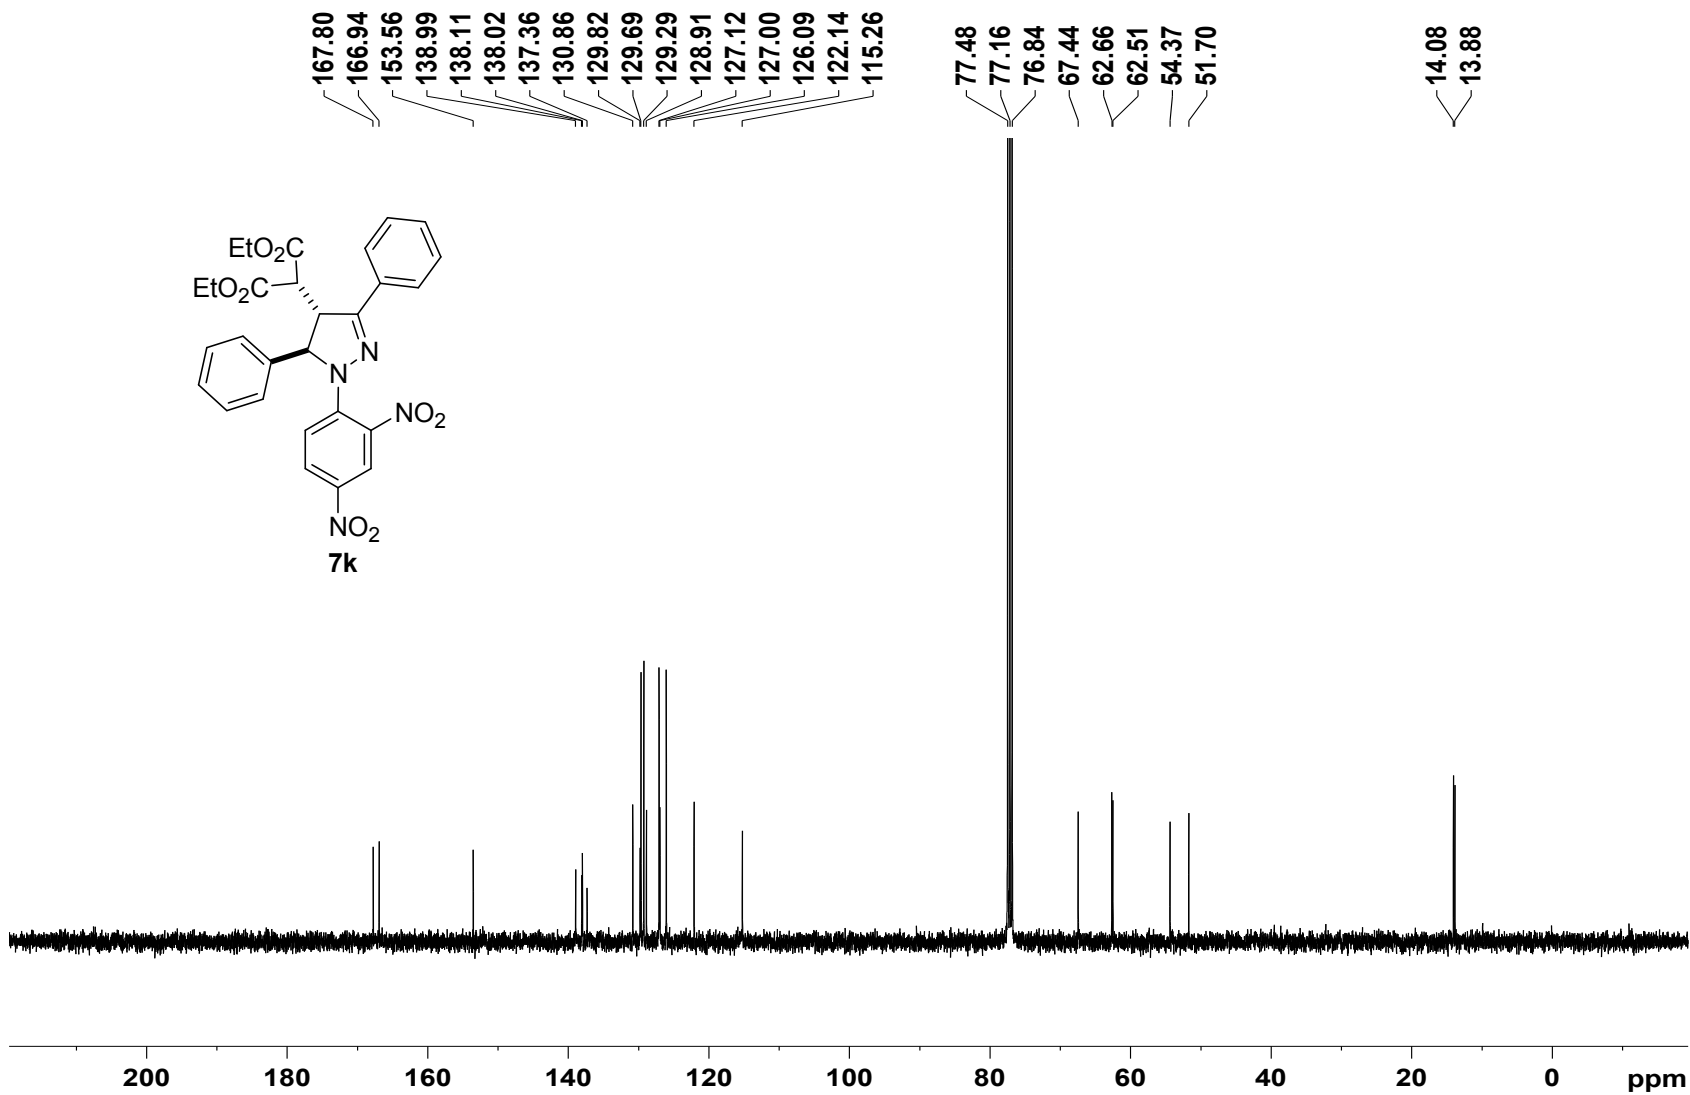

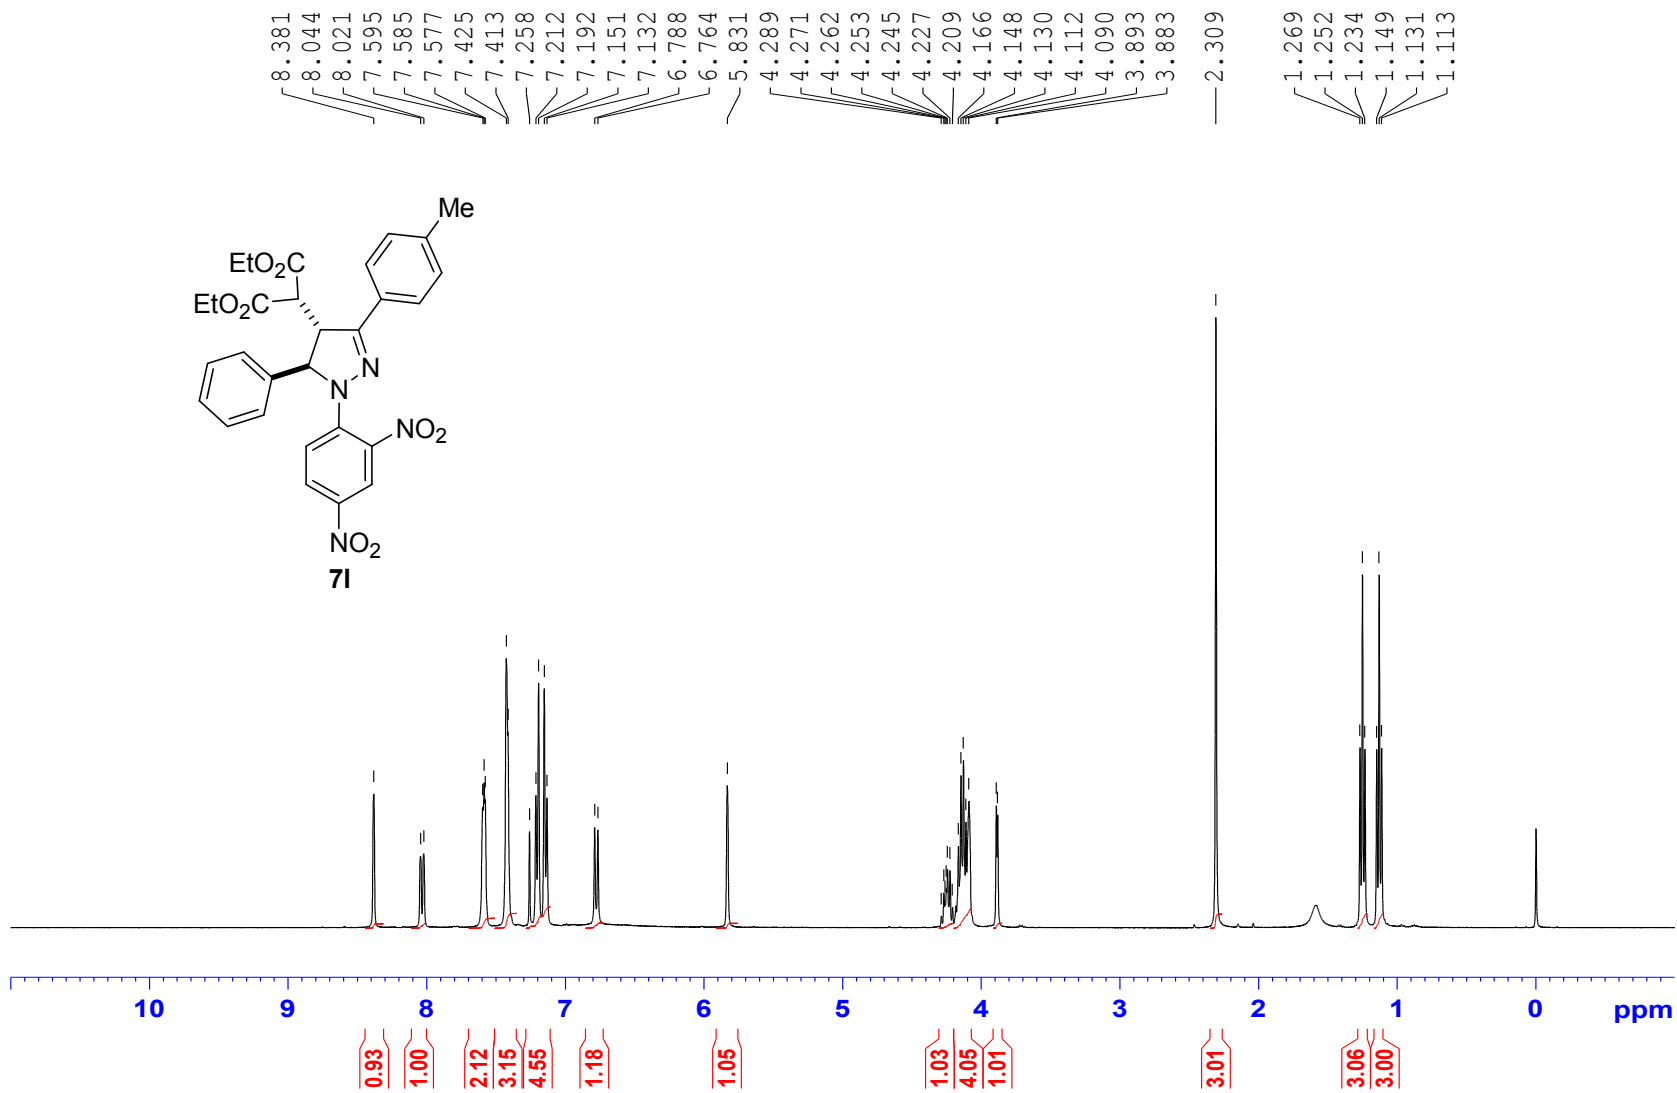



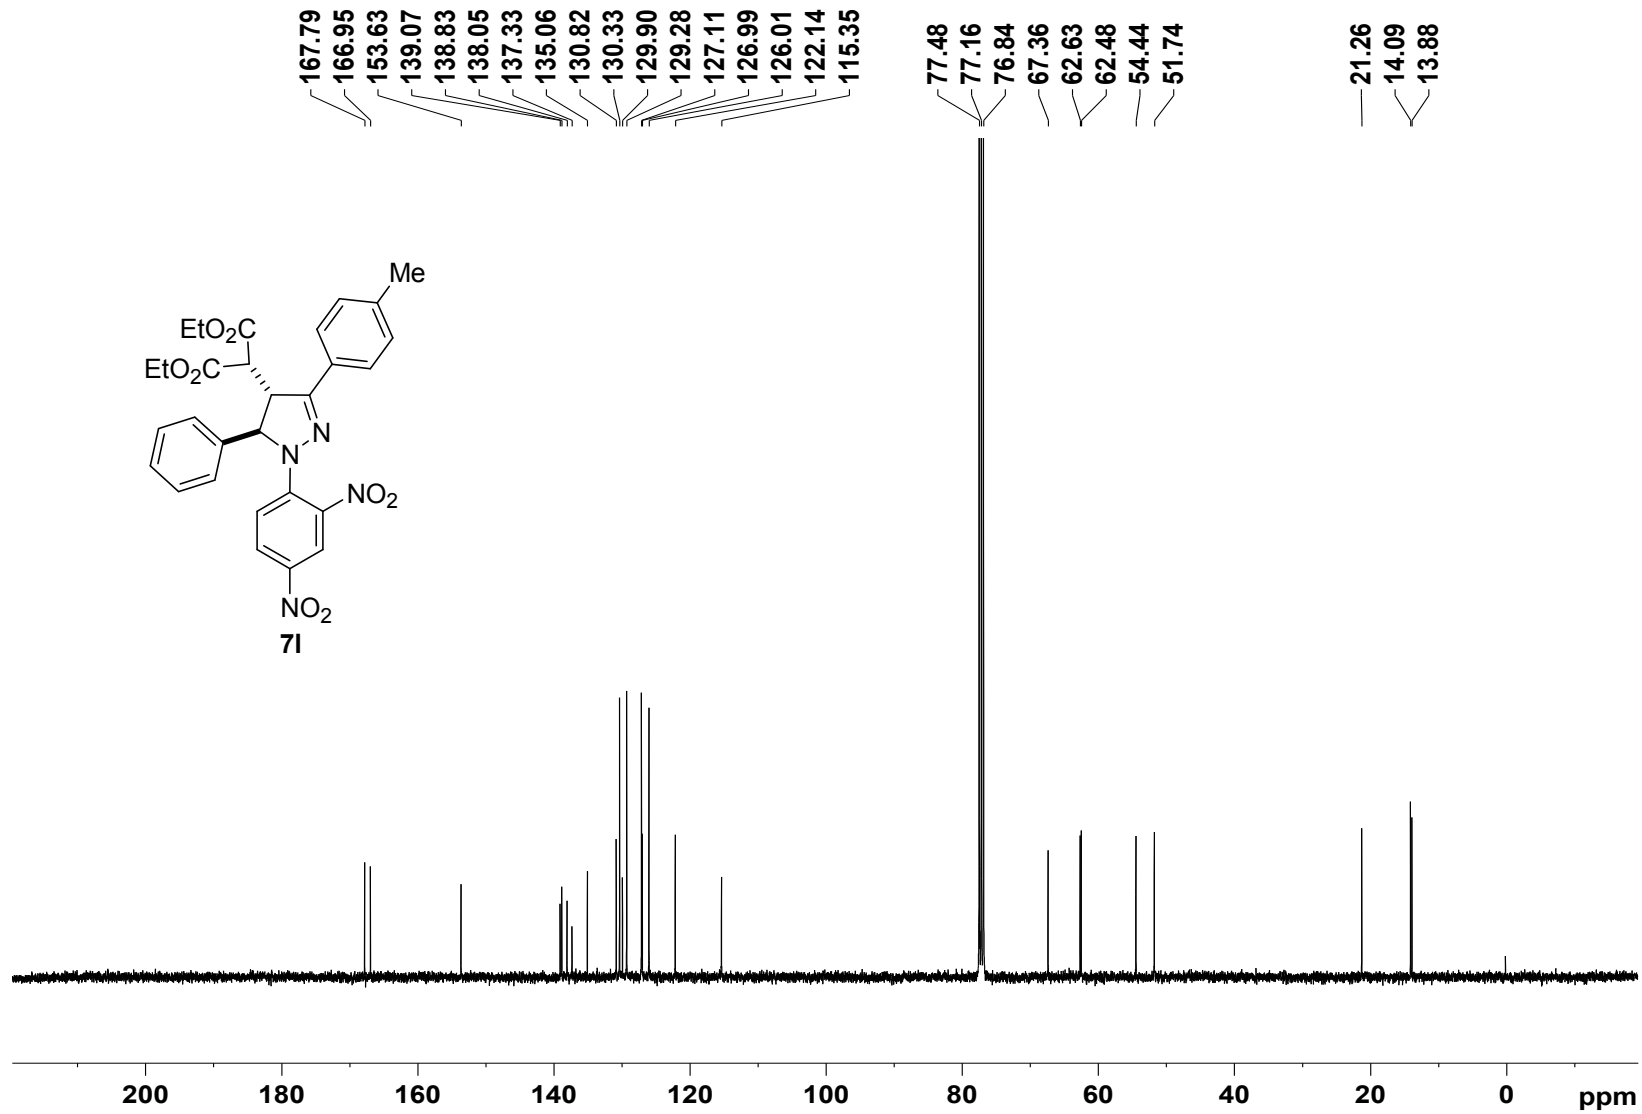

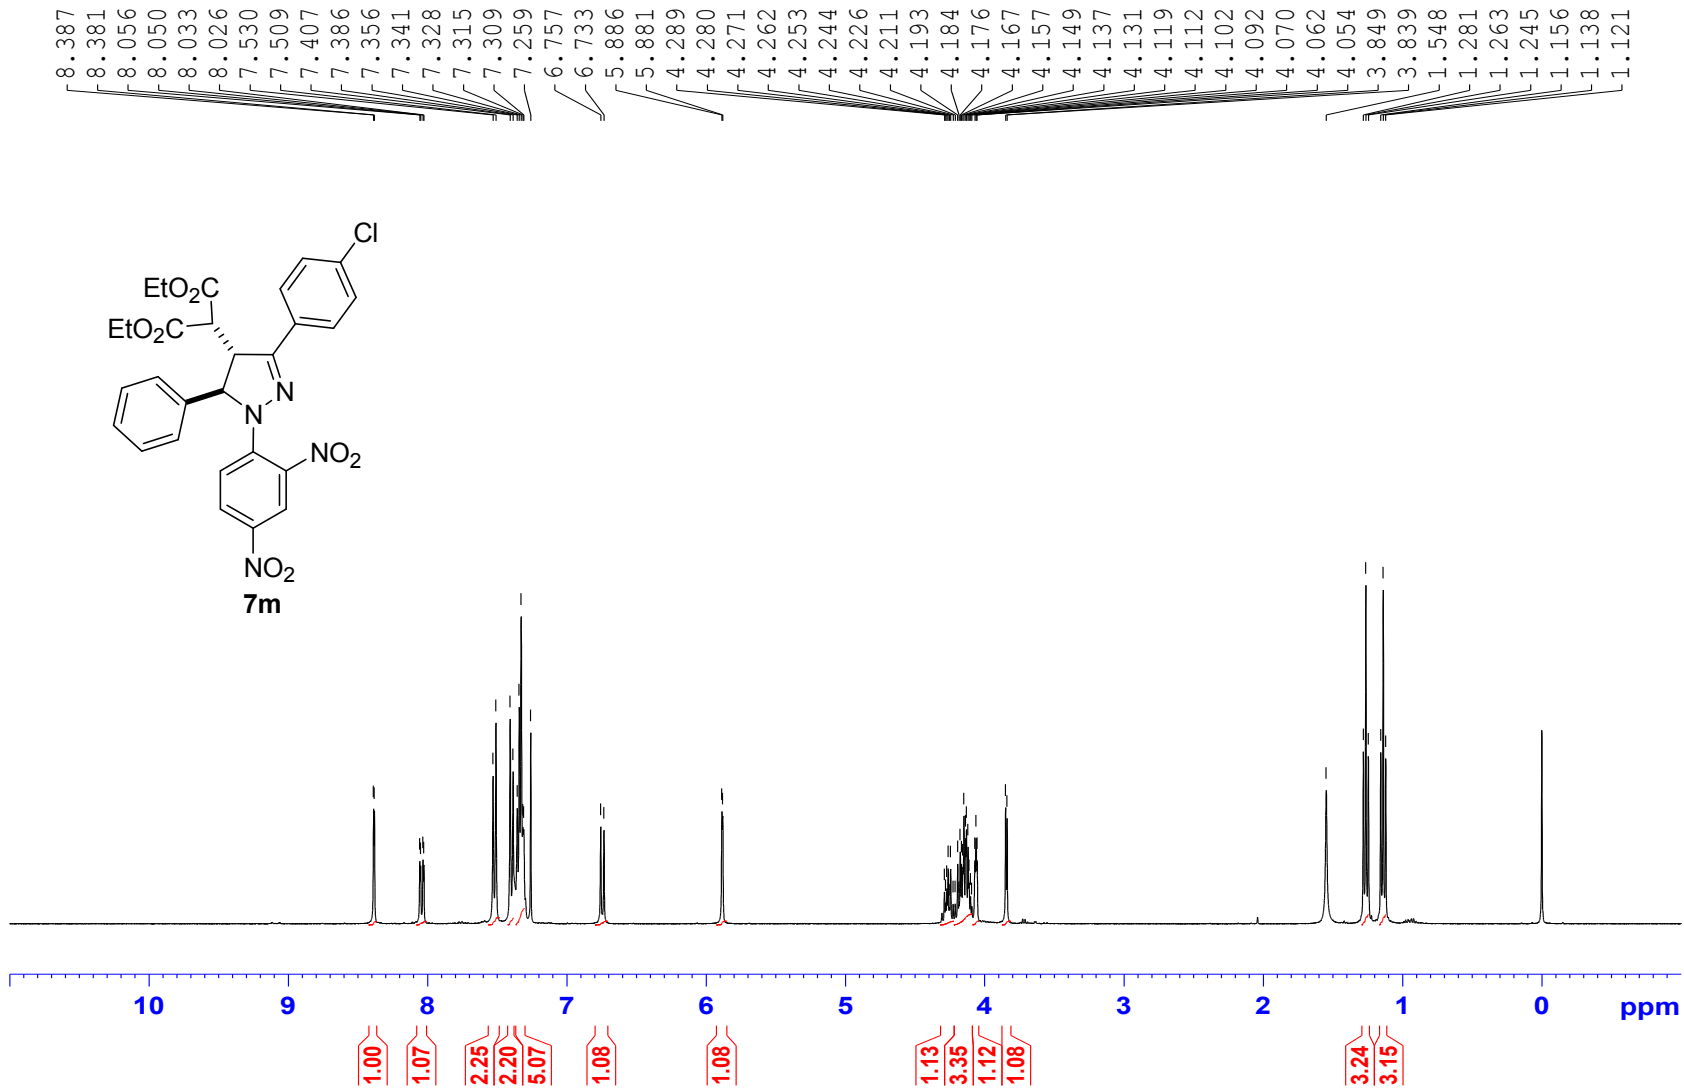

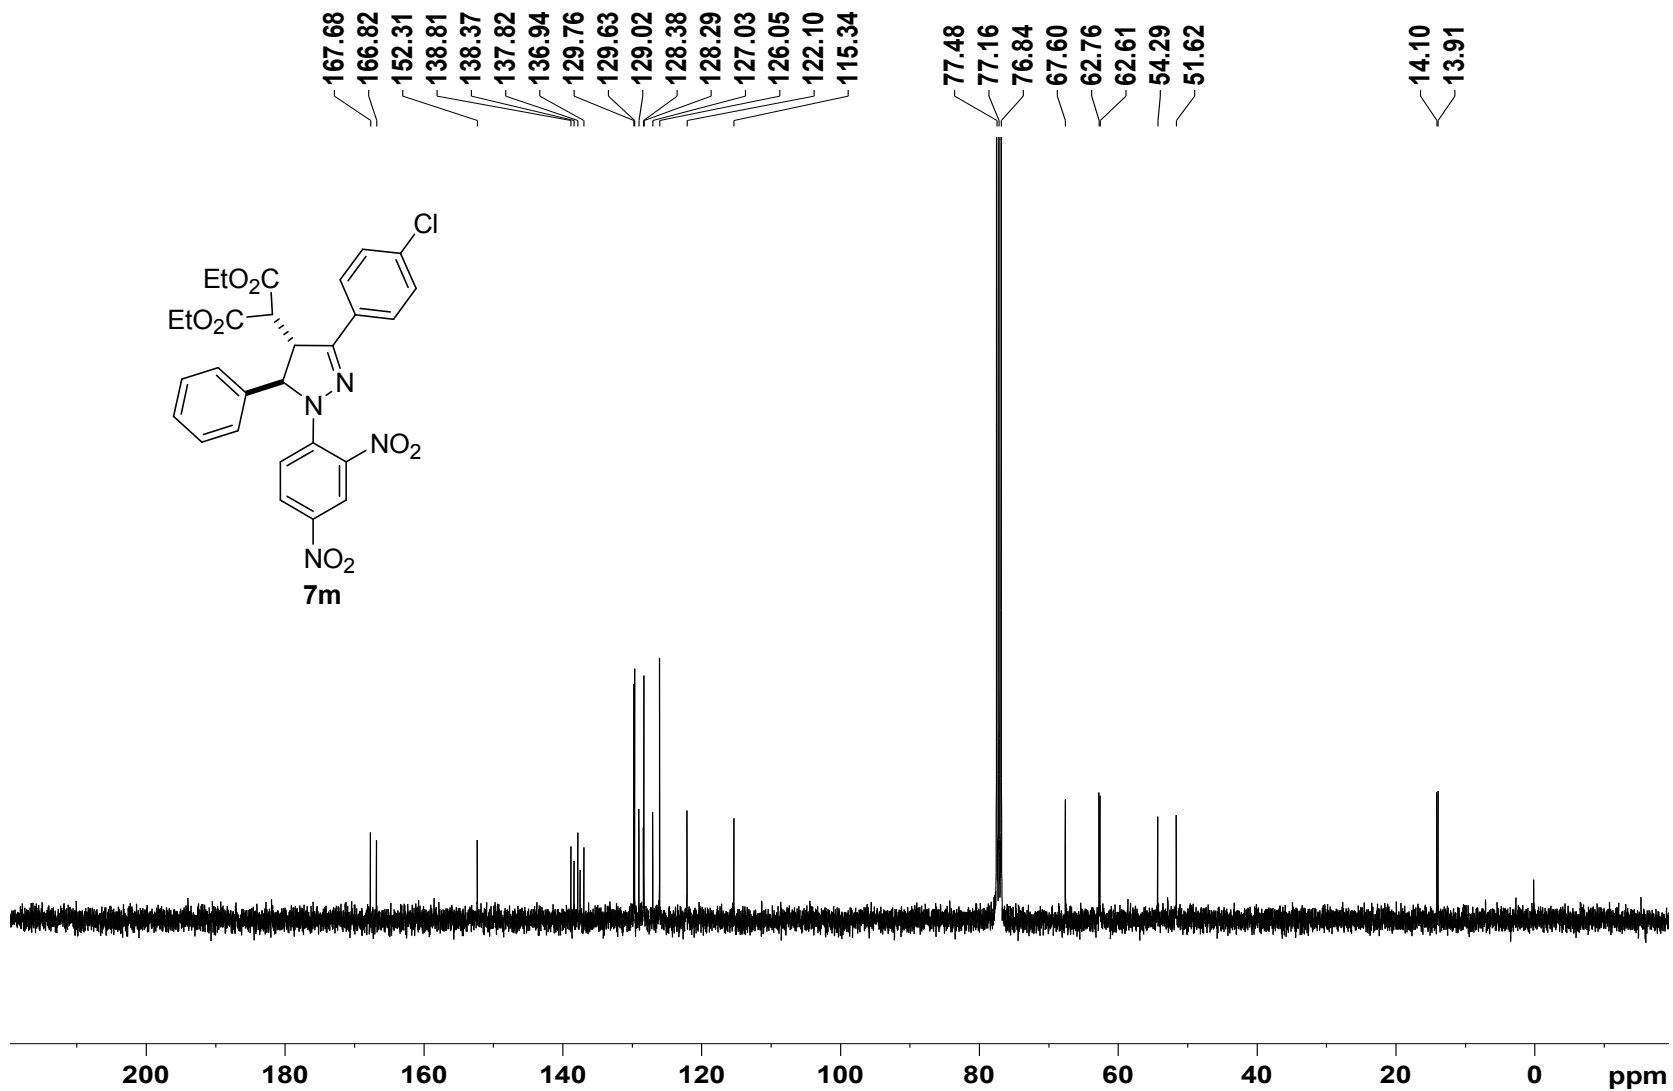

8.418  
8.412  
8.124  
8.117  
8.100  
8.094  
7.514  
7.494  
7.261  
7.248  
7.229  
7.011  
7.004  
6.988  
6.964  
6.928  
6.919  
6.916  
6.907  
6.127  
6.122  
4.288  
4.270  
4.261  
4.243  
4.224  
4.205  
4.200  
4.194  
4.189  
4.184  
4.166  
4.160  
4.148  
4.139  
4.132  
4.121  
4.115  
4.103  
4.097  
4.088  
3.899  
3.889  
2.395  
1.287  
1.270  
1.252  
1.145  
1.127  
1.109

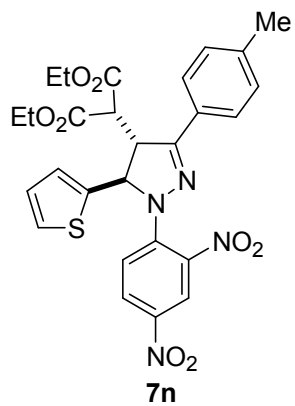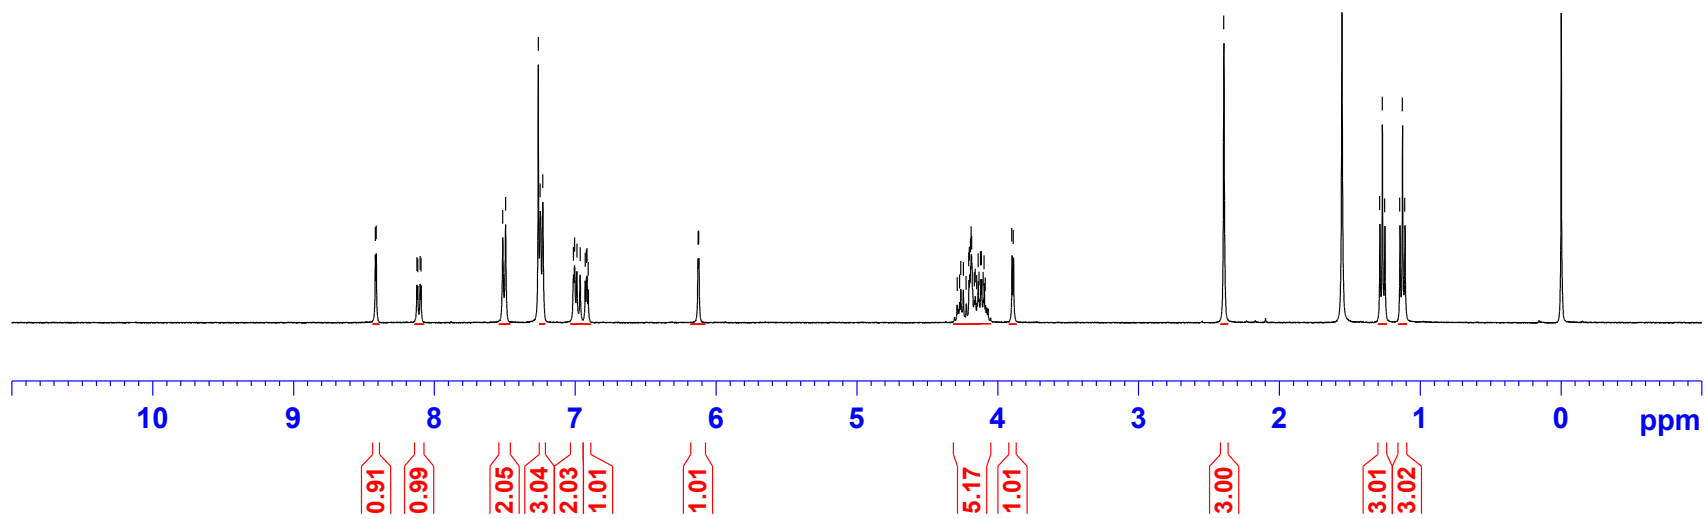

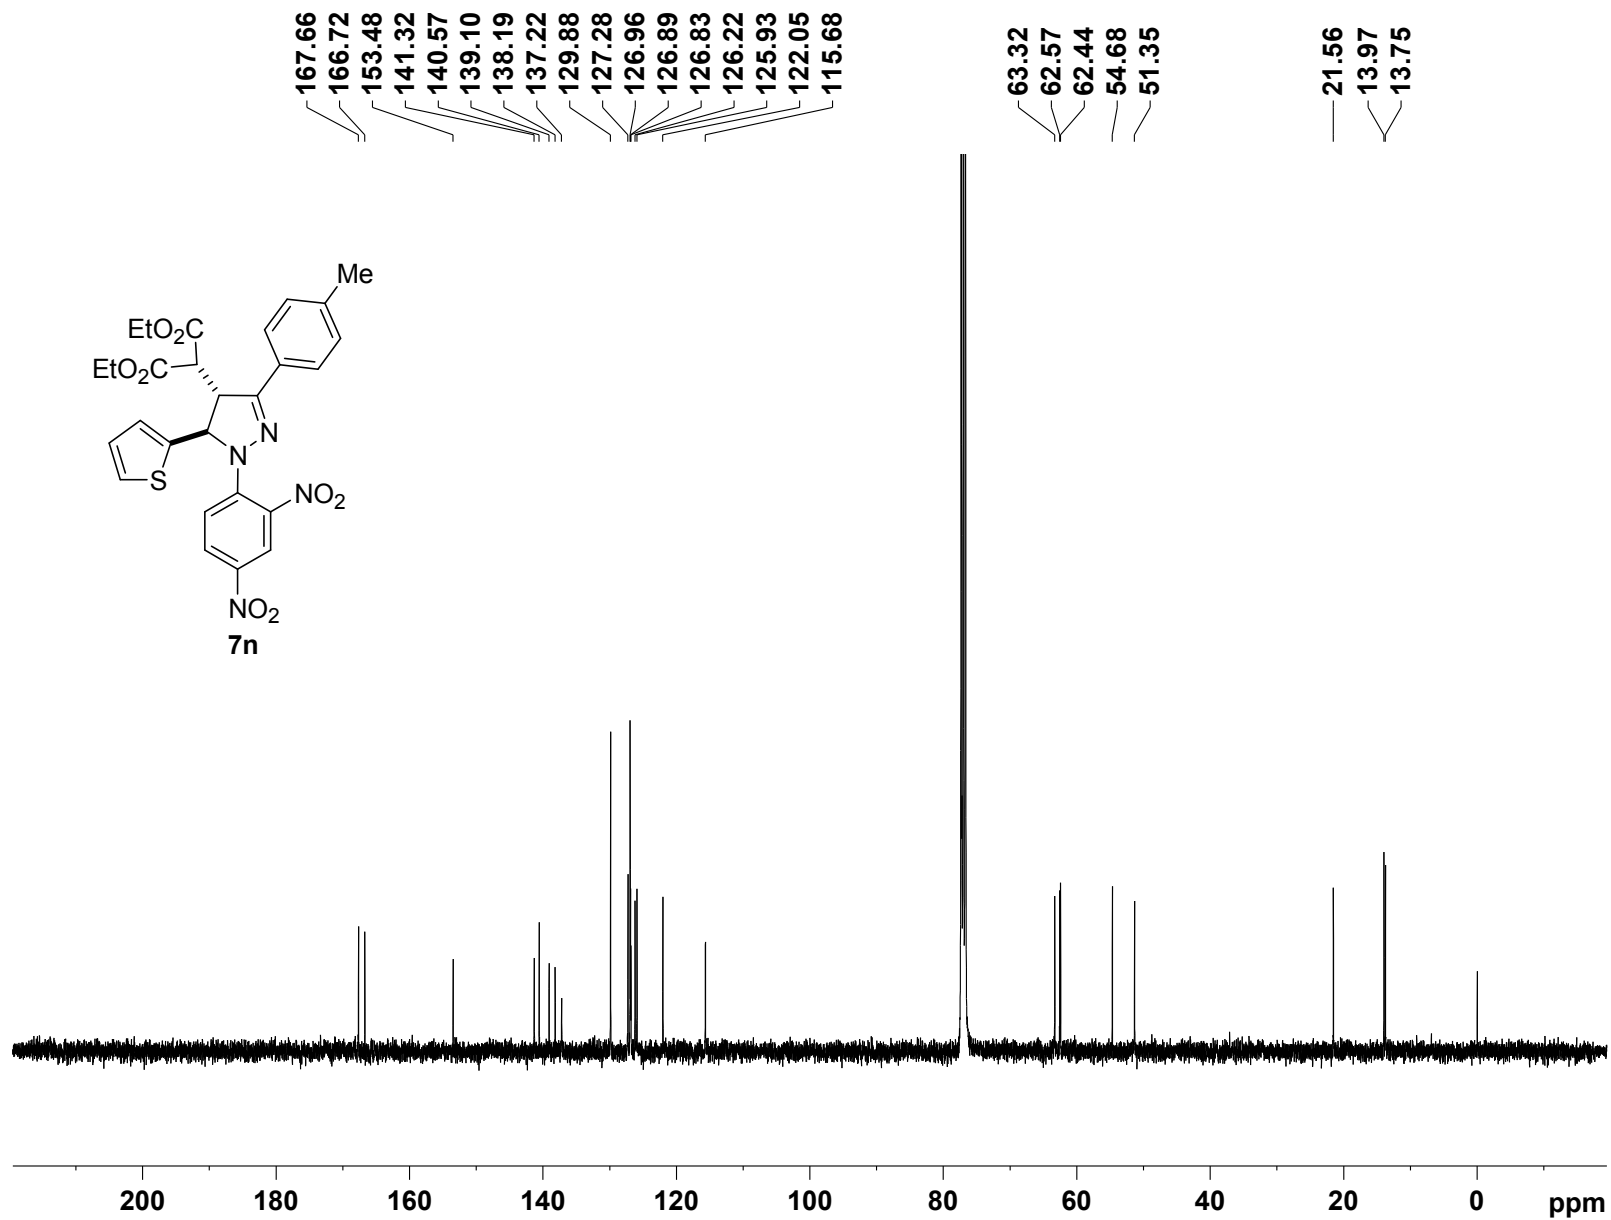

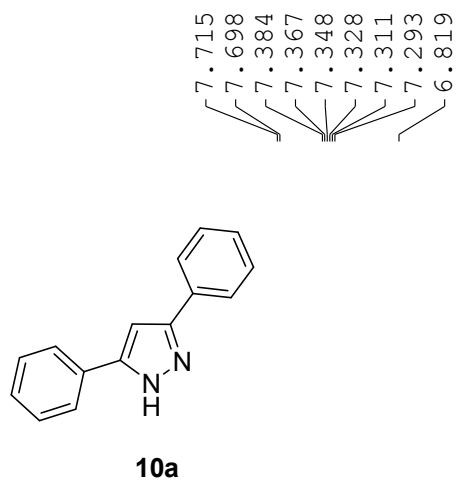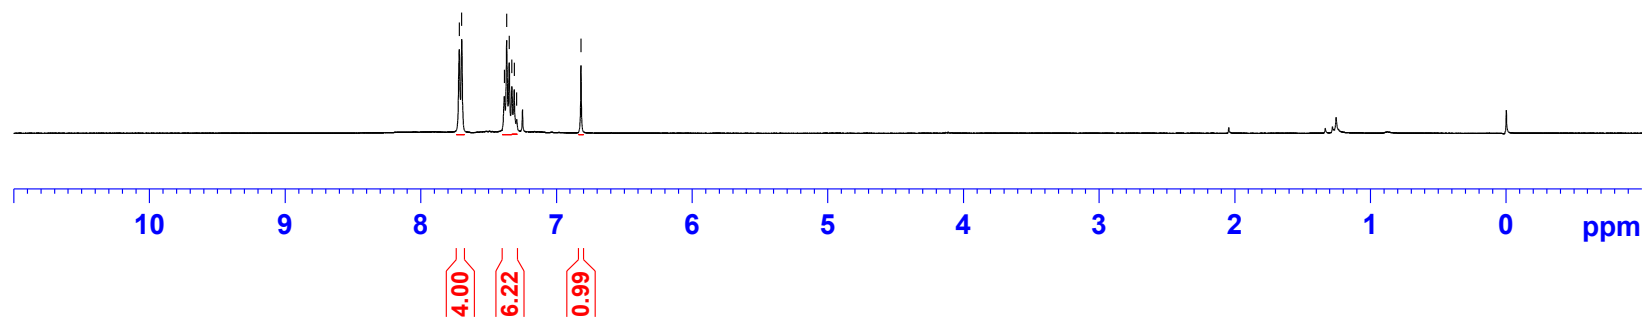

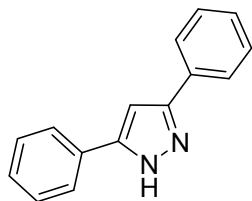

10a

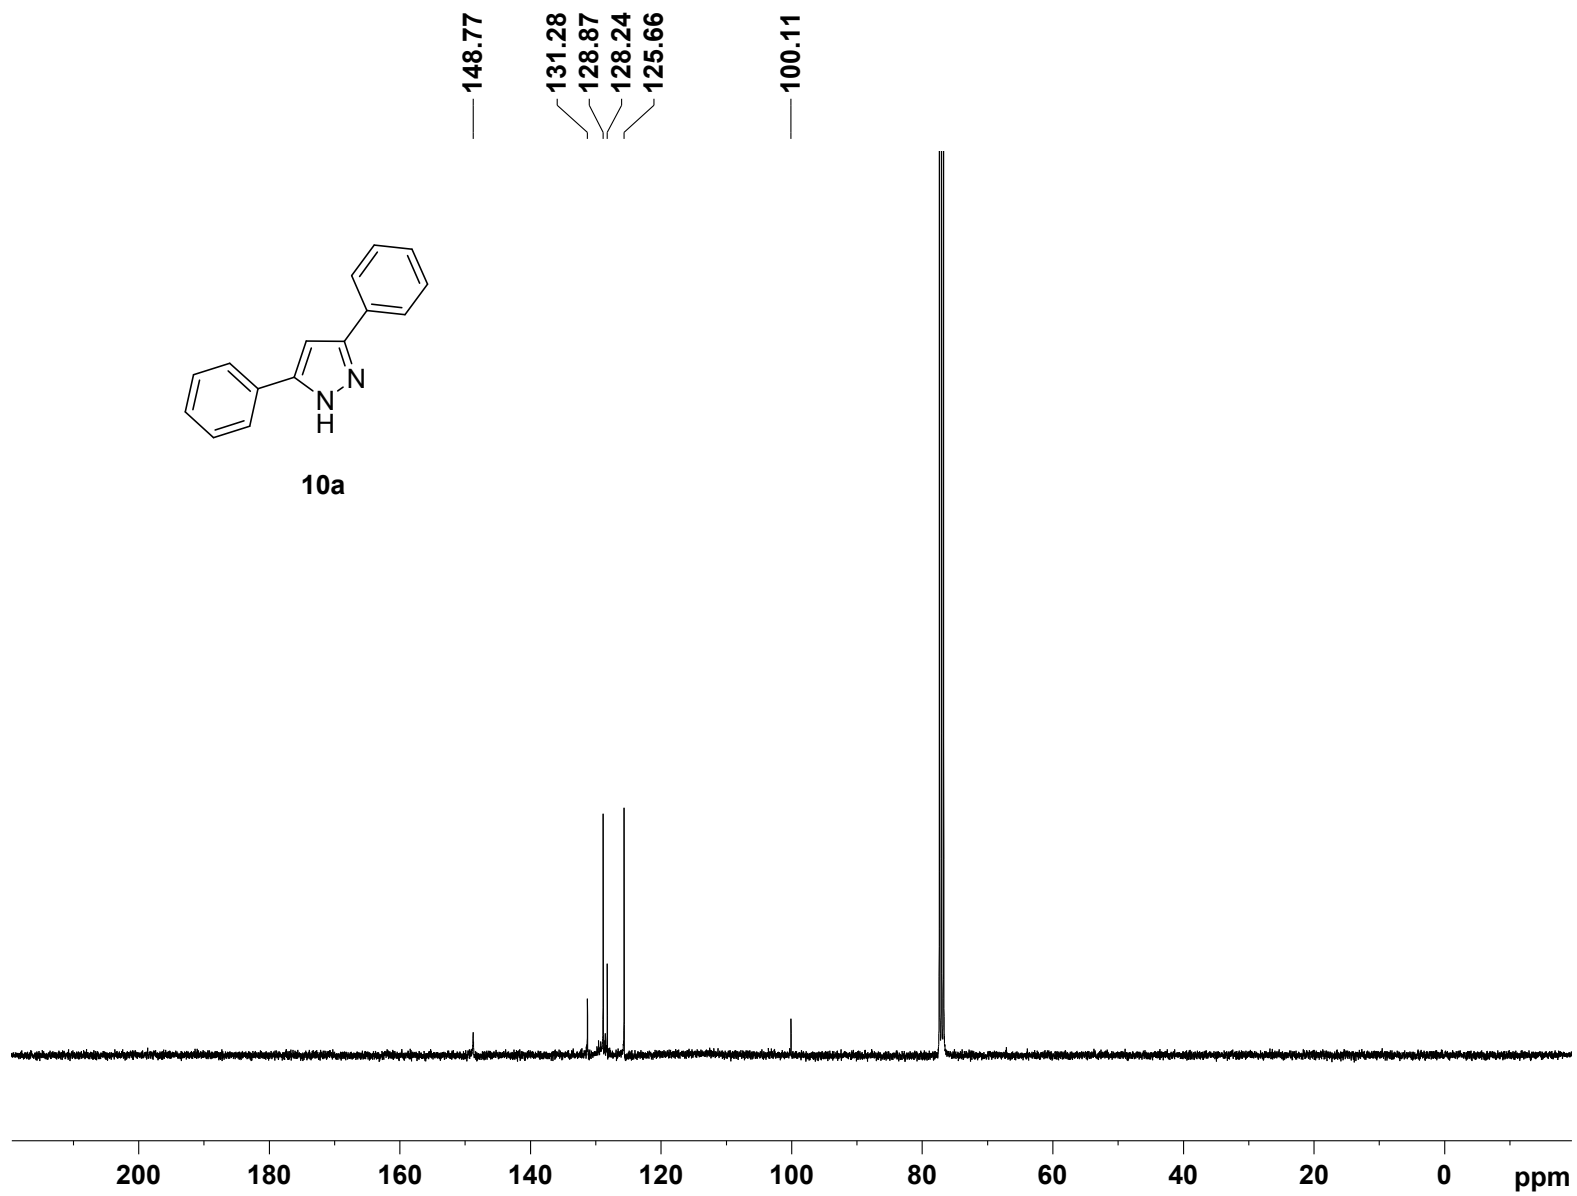

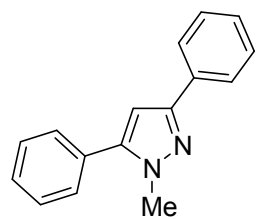

10b

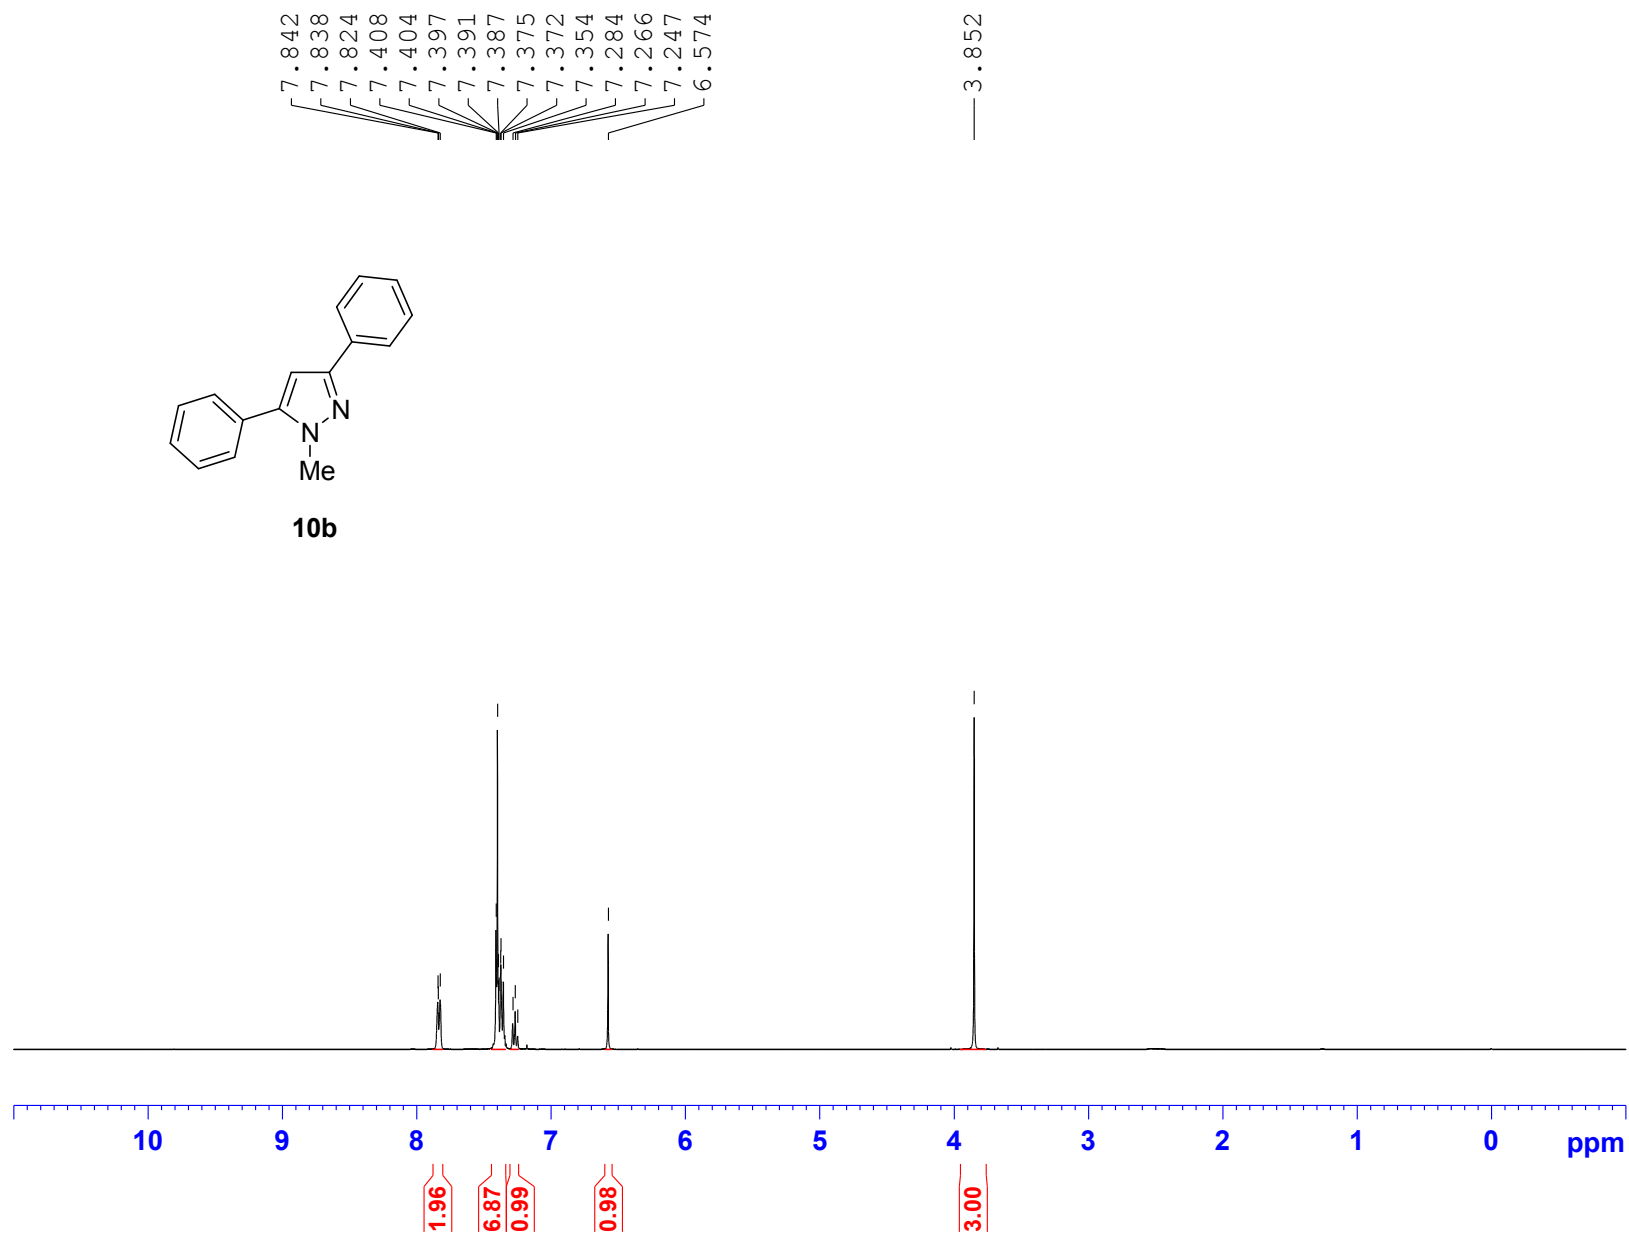



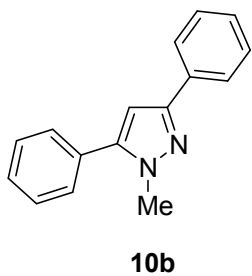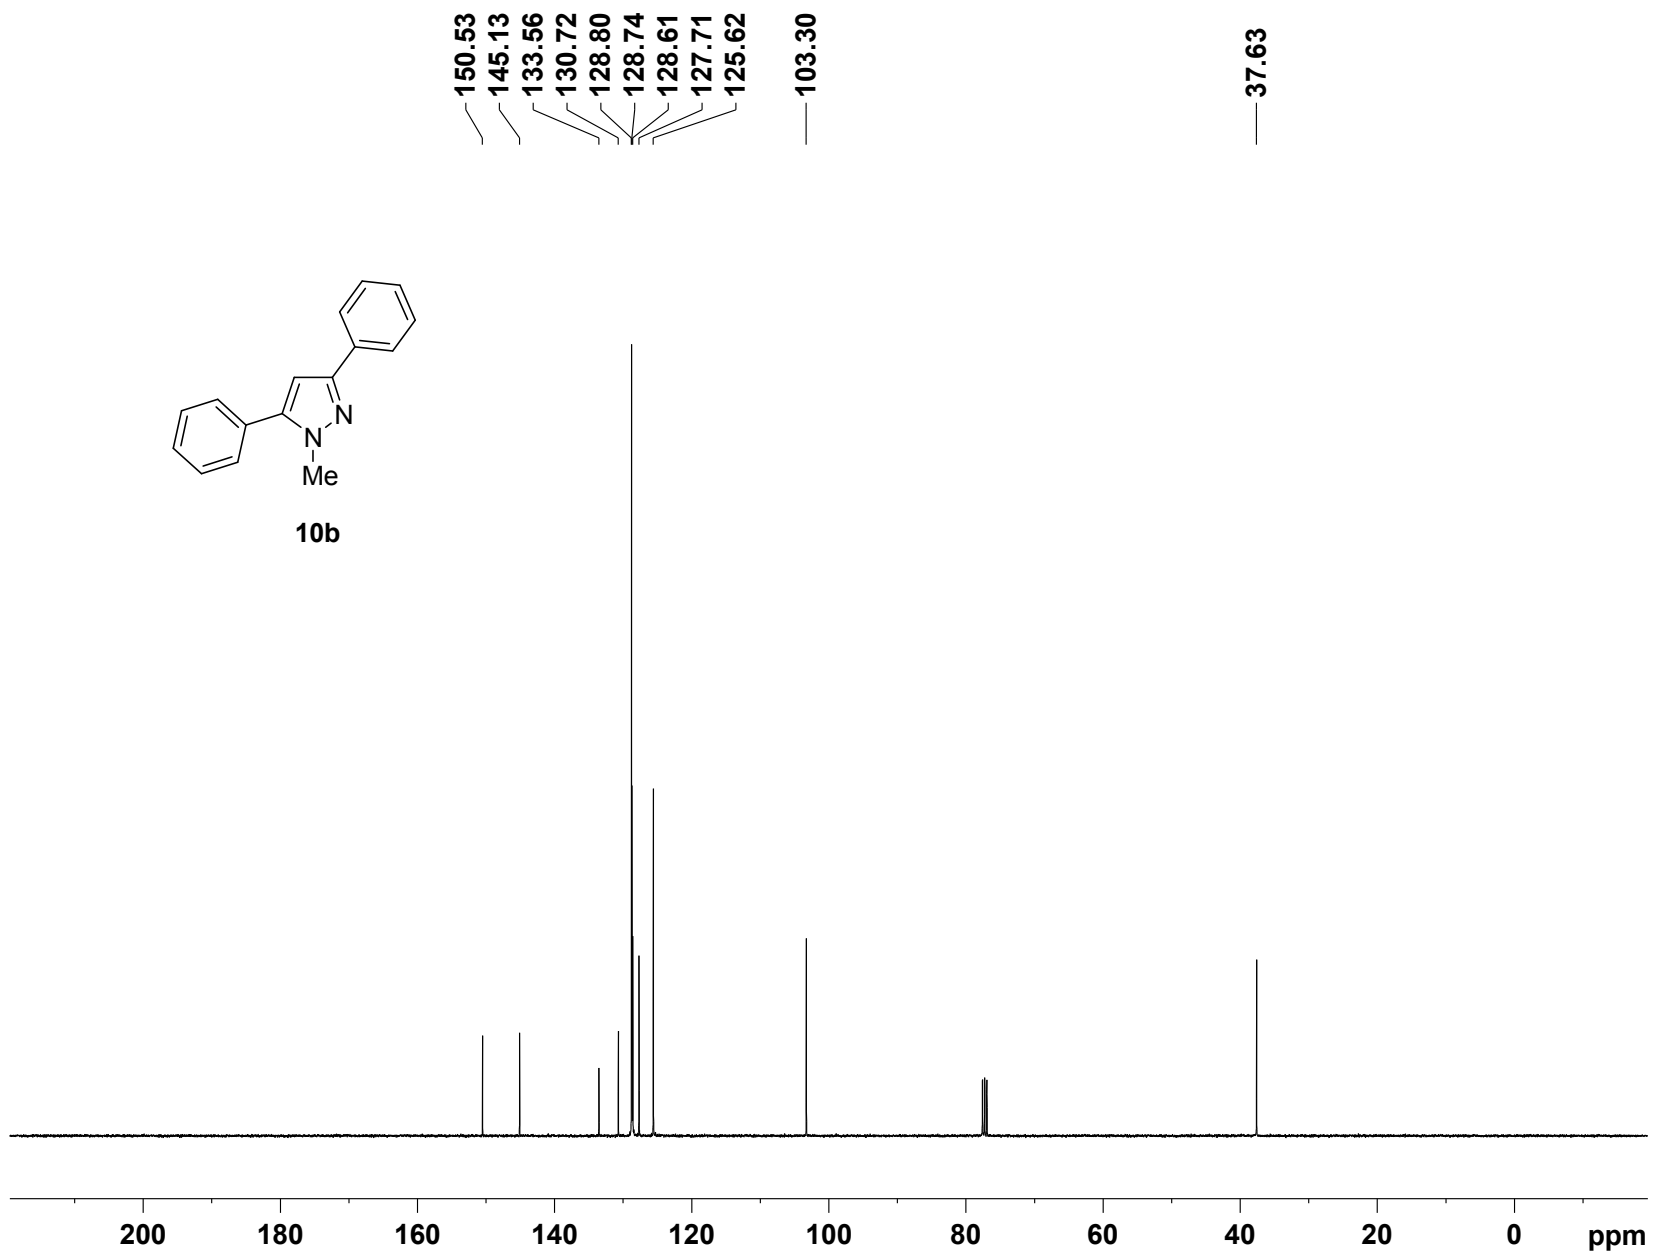

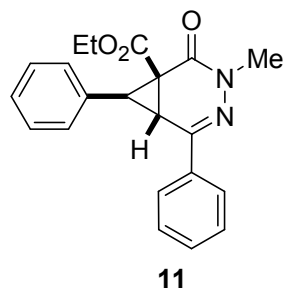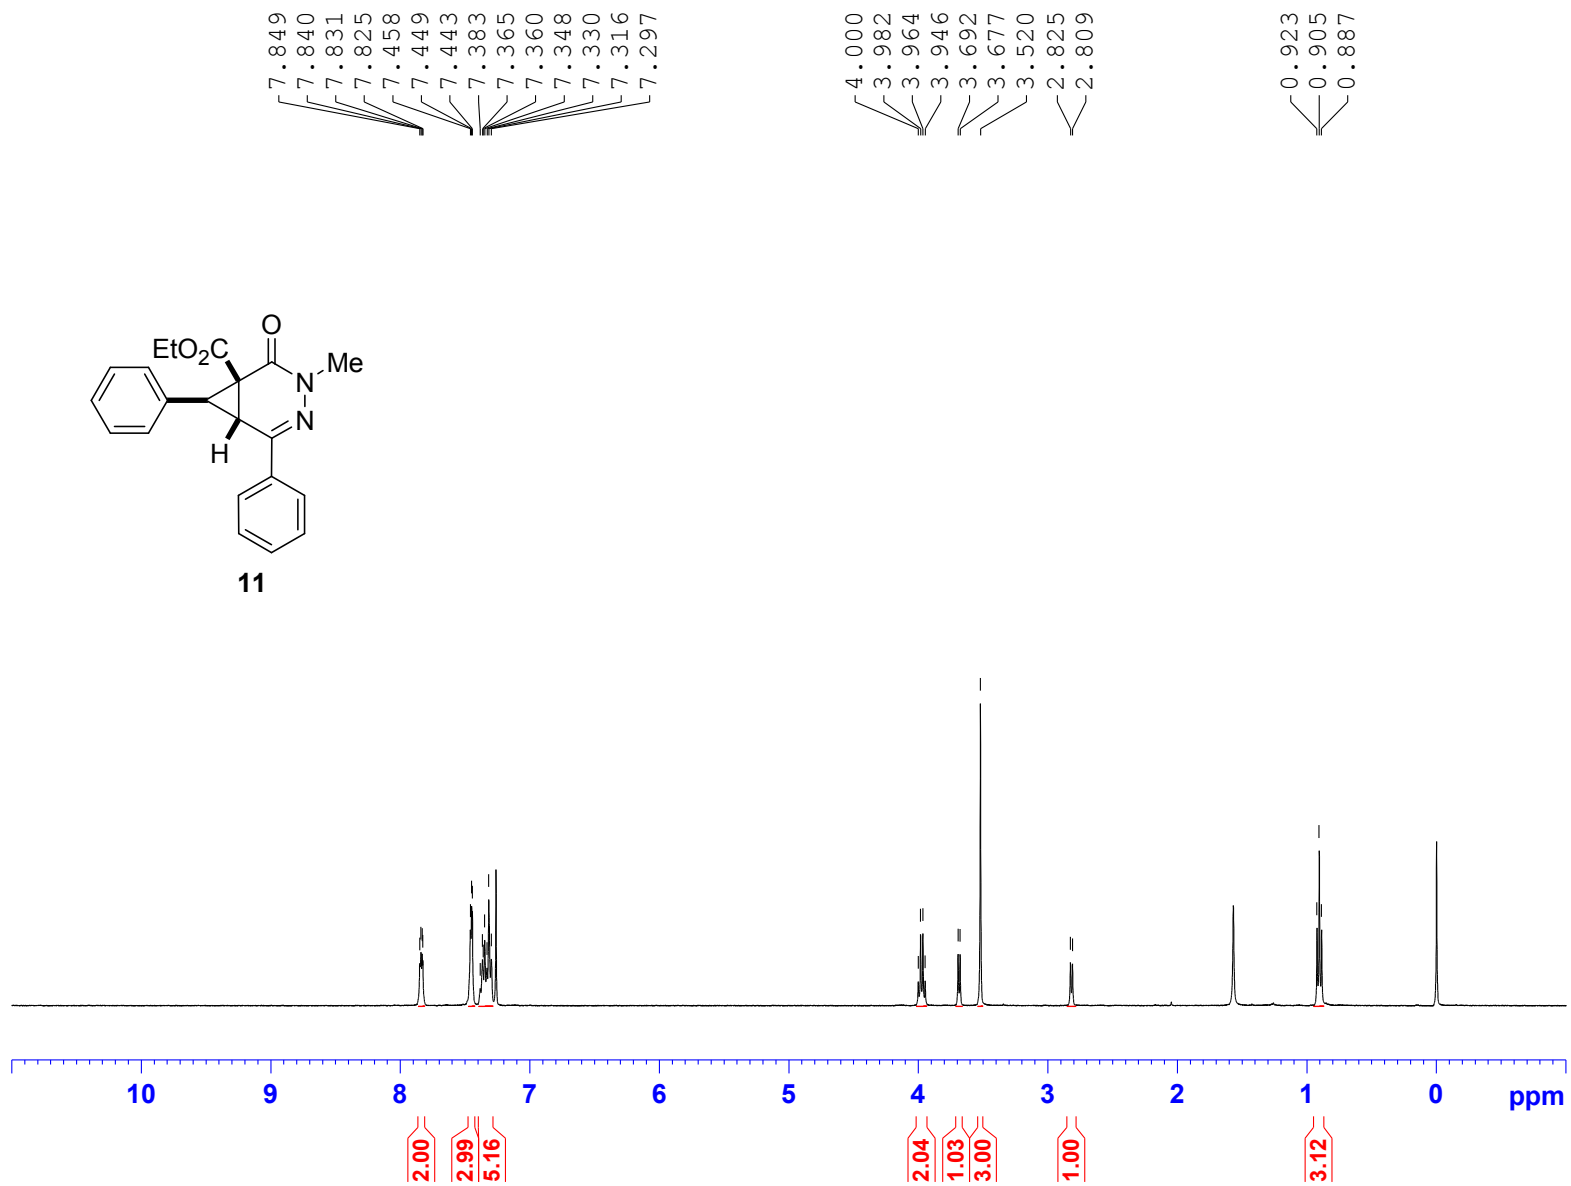

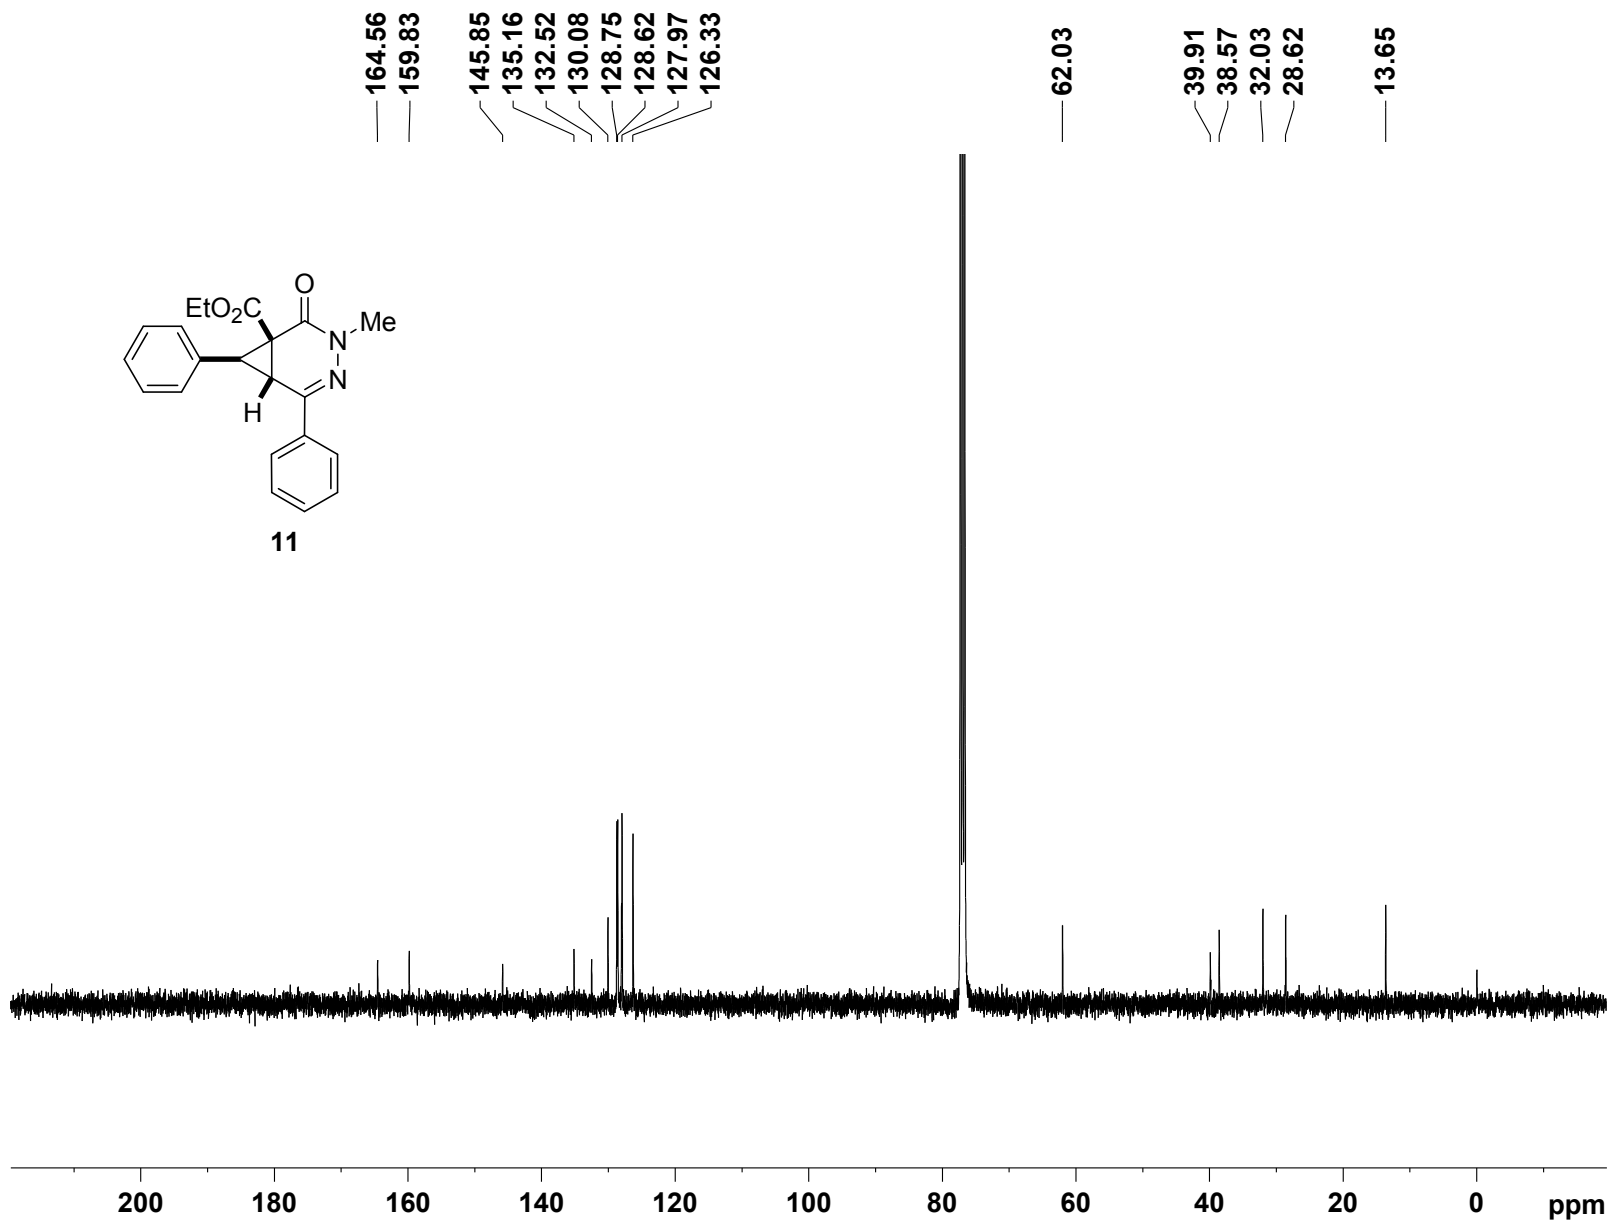

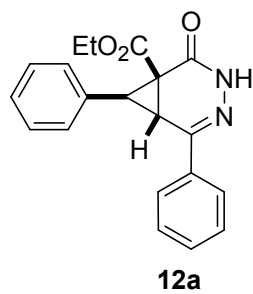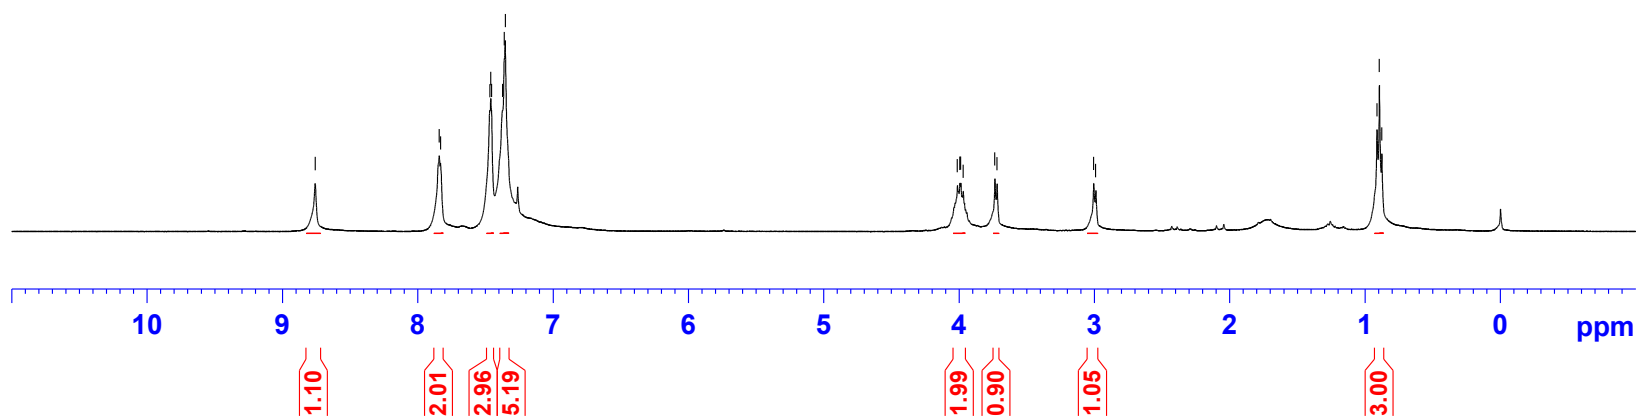

— 8.758

7.841  
 7.832  
 7.467  
 7.460  
 7.454  
 7.374  
 7.360  
 7.353

4.013  
 3.995  
 3.988  
 3.970  
 3.736  
 3.720  
 3.006  
 2.990

0.912  
 0.895  
 0.877

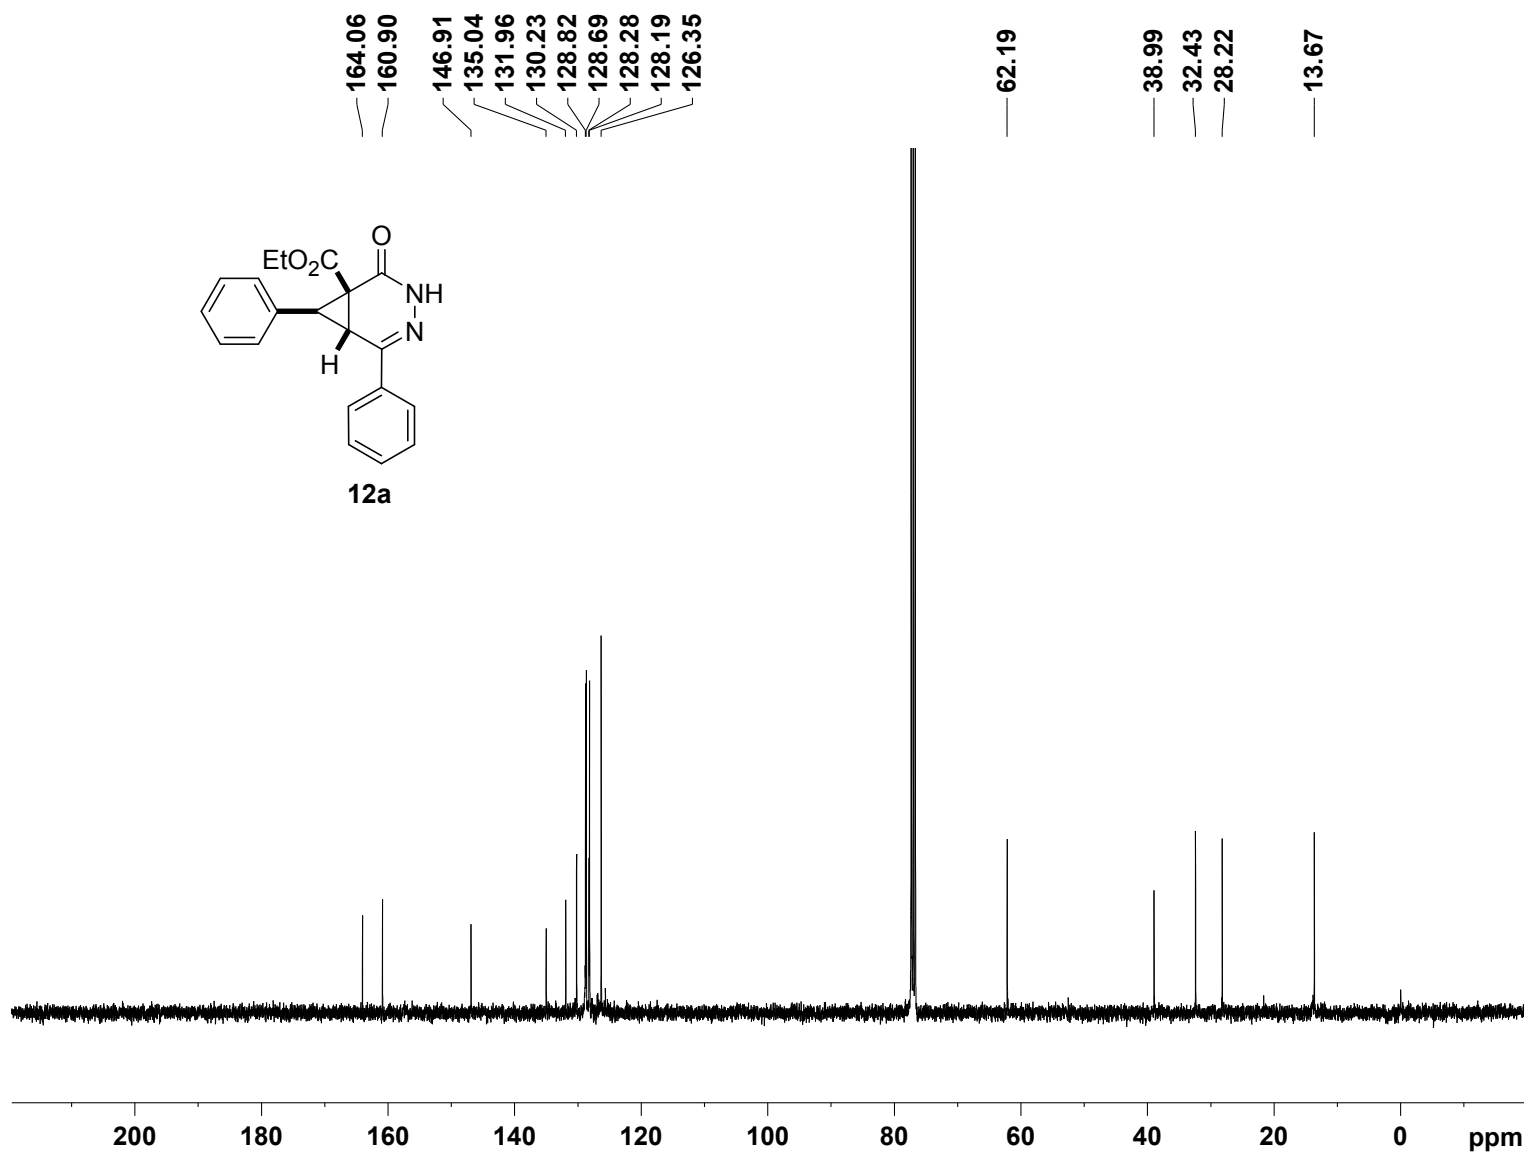

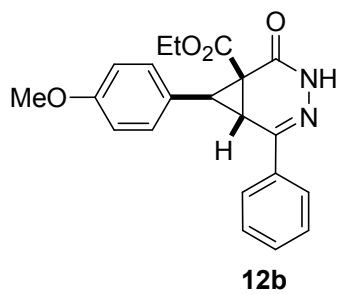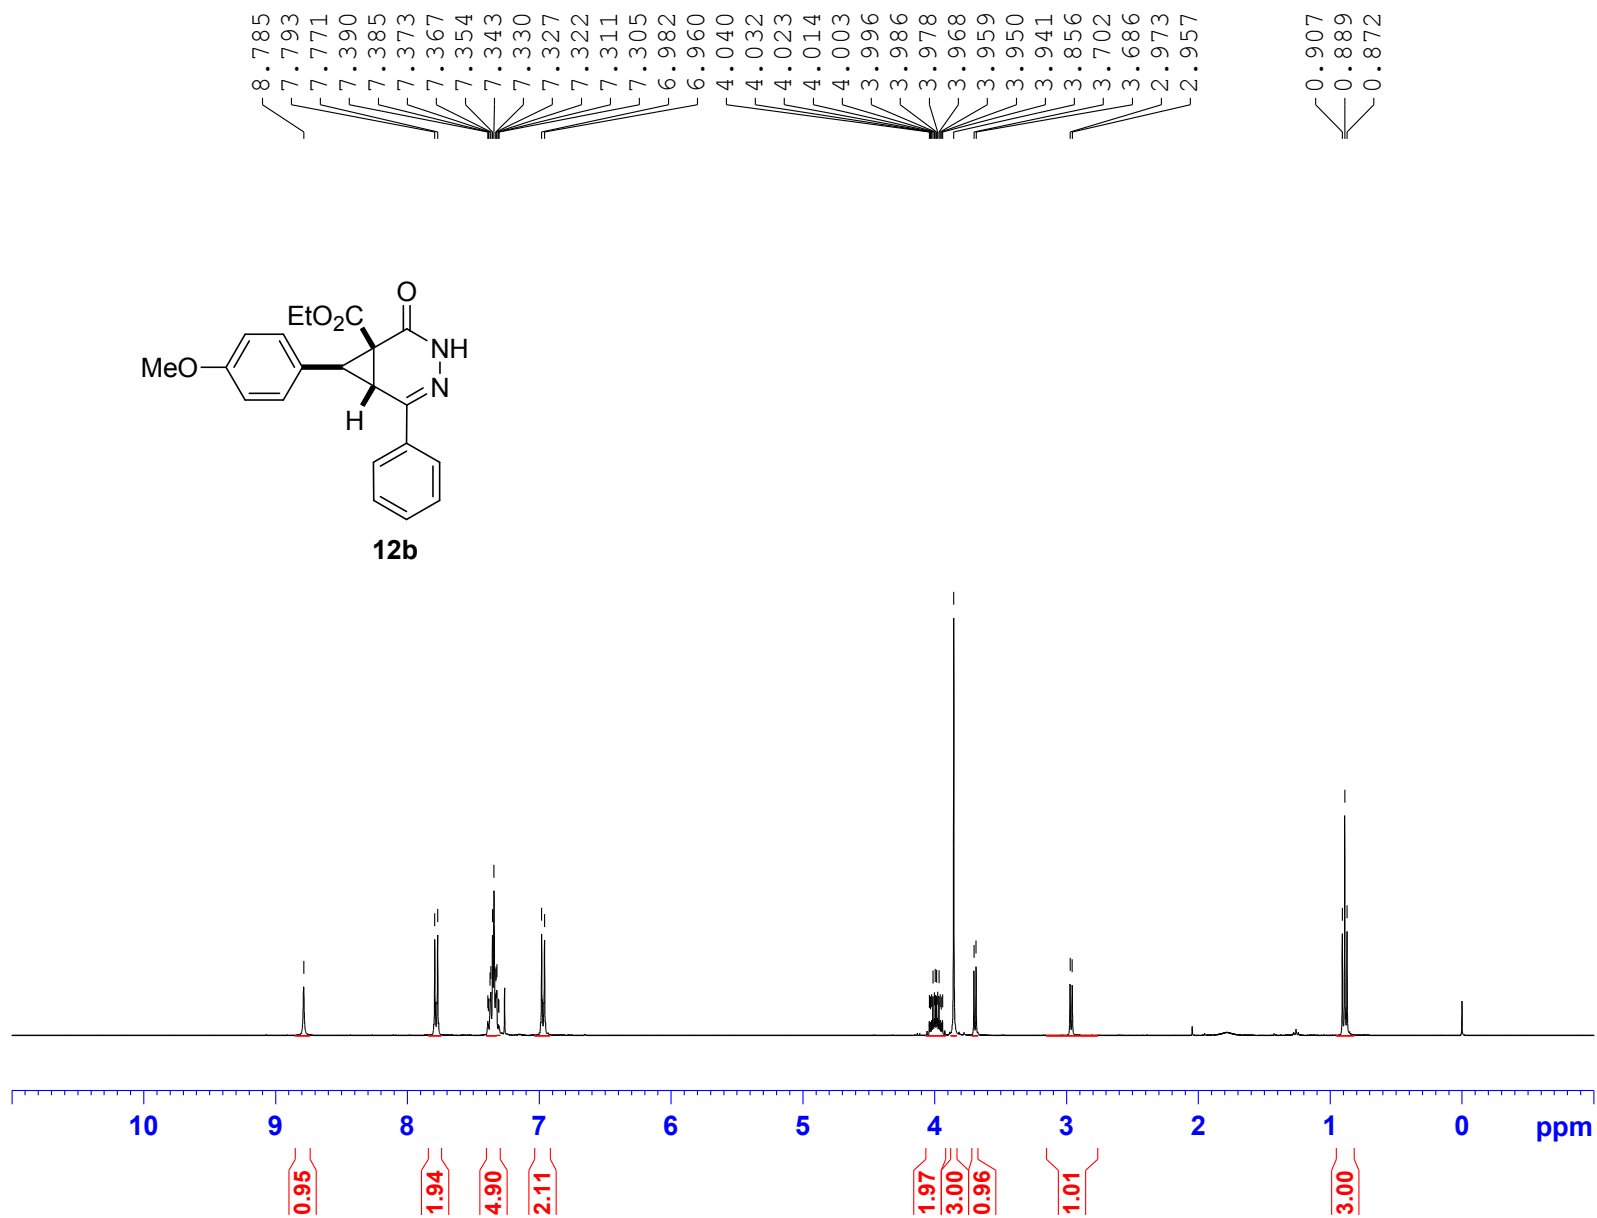

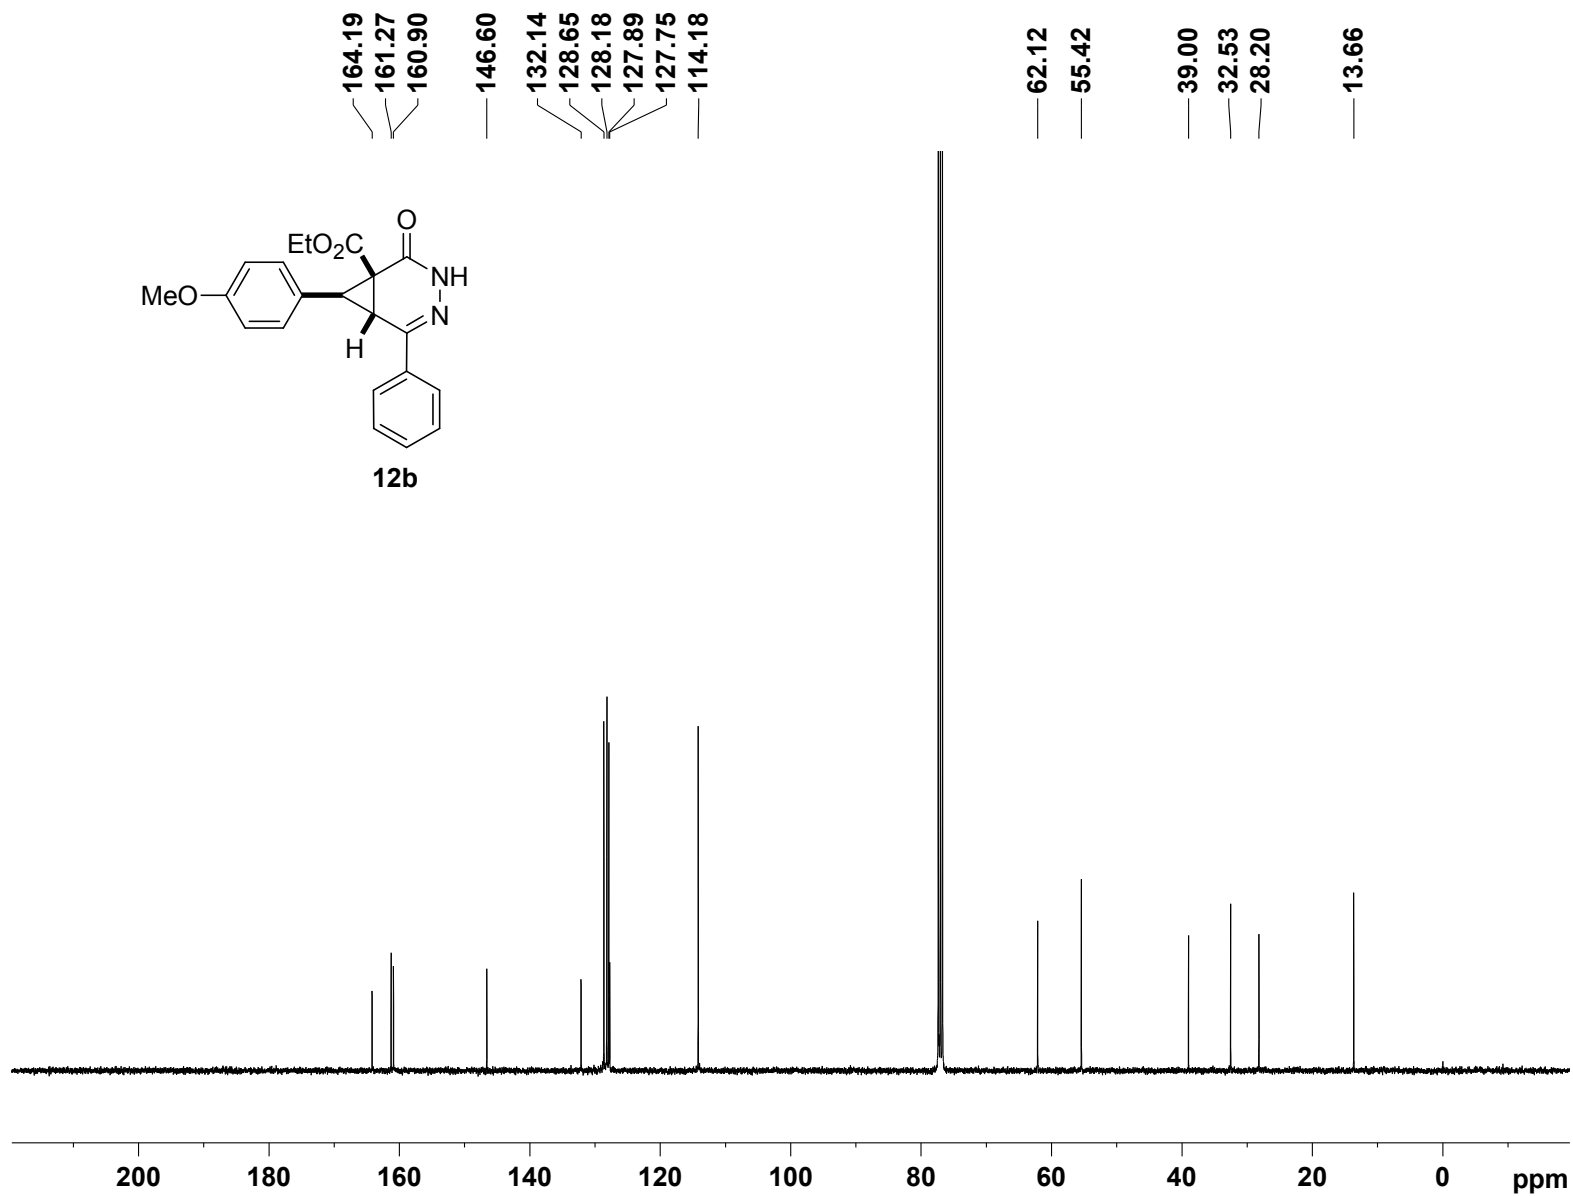

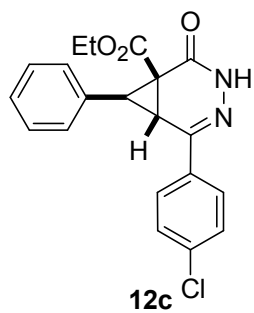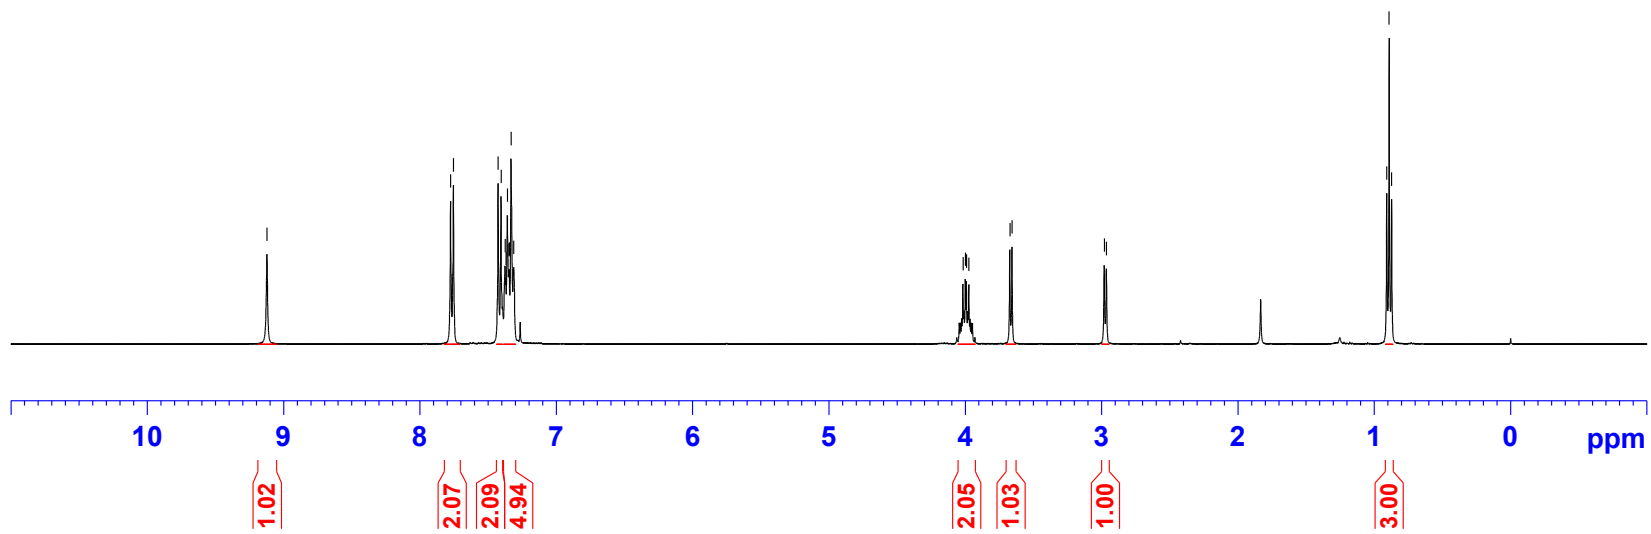

9.121  
 7.774  
 7.753  
 7.426  
 7.404  
 7.374  
 7.369  
 7.358  
 7.347  
 7.343  
 7.330  
 7.311

4.016  
 3.998  
 3.990  
 3.972  
 3.672  
 3.656  
 2.979  
 2.963

0.909  
 0.891  
 0.873



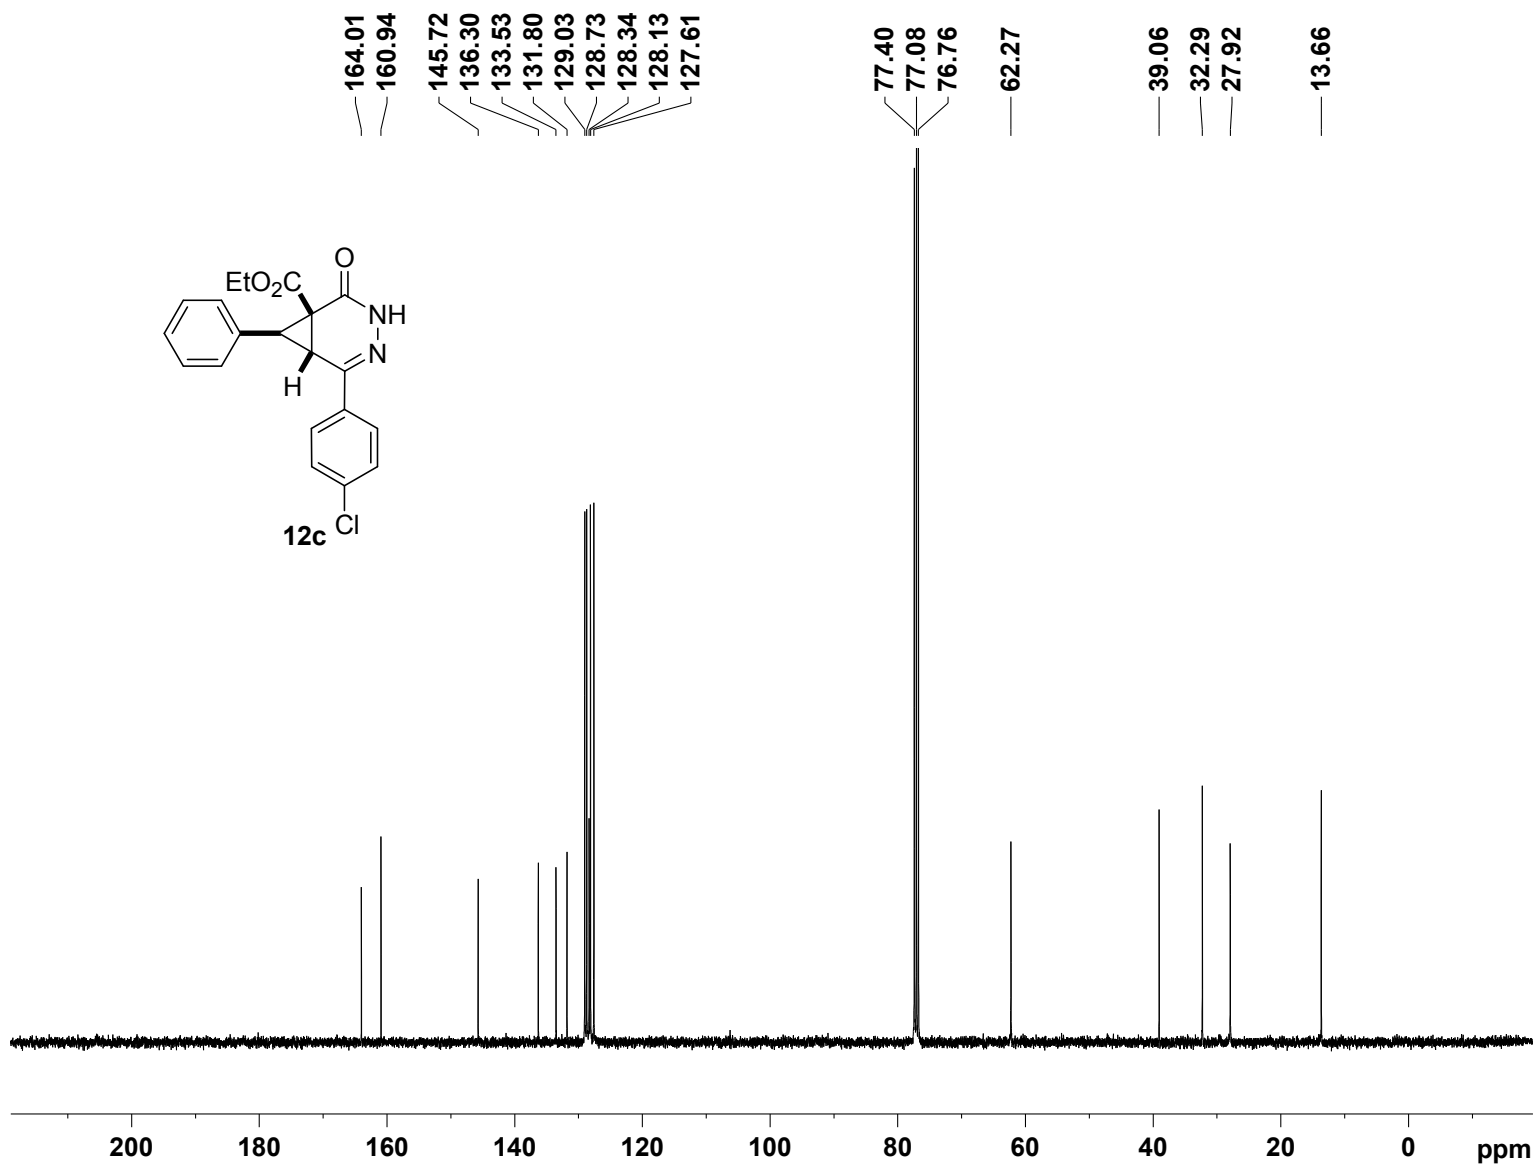

8.870  
8.233  
8.011  
8.007  
7.990  
7.985  
7.923  
7.900  
7.878  
7.867  
7.851  
7.562  
7.550  
7.545  
7.536  
7.526  
7.522  
7.409  
7.397  
7.372  
7.363  
7.360  
7.350  
7.344  
7.338  
4.070  
4.061  
4.052  
4.043  
4.034  
4.025  
4.016  
4.007  
3.998  
3.989  
3.980  
3.971  
3.894  
3.878  
3.056  
3.040

0.932  
0.914  
0.896

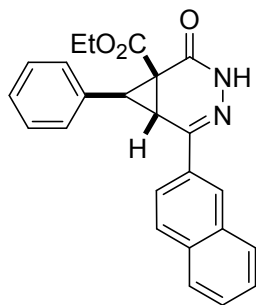

12d

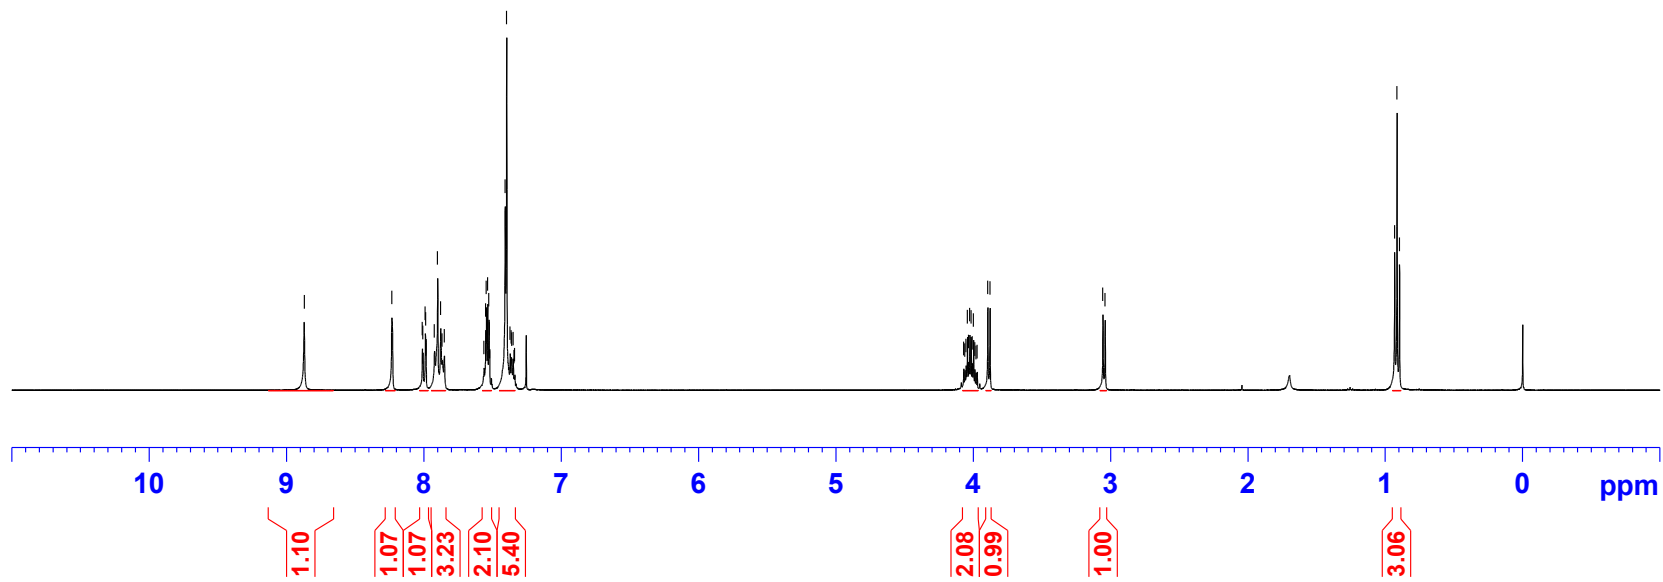

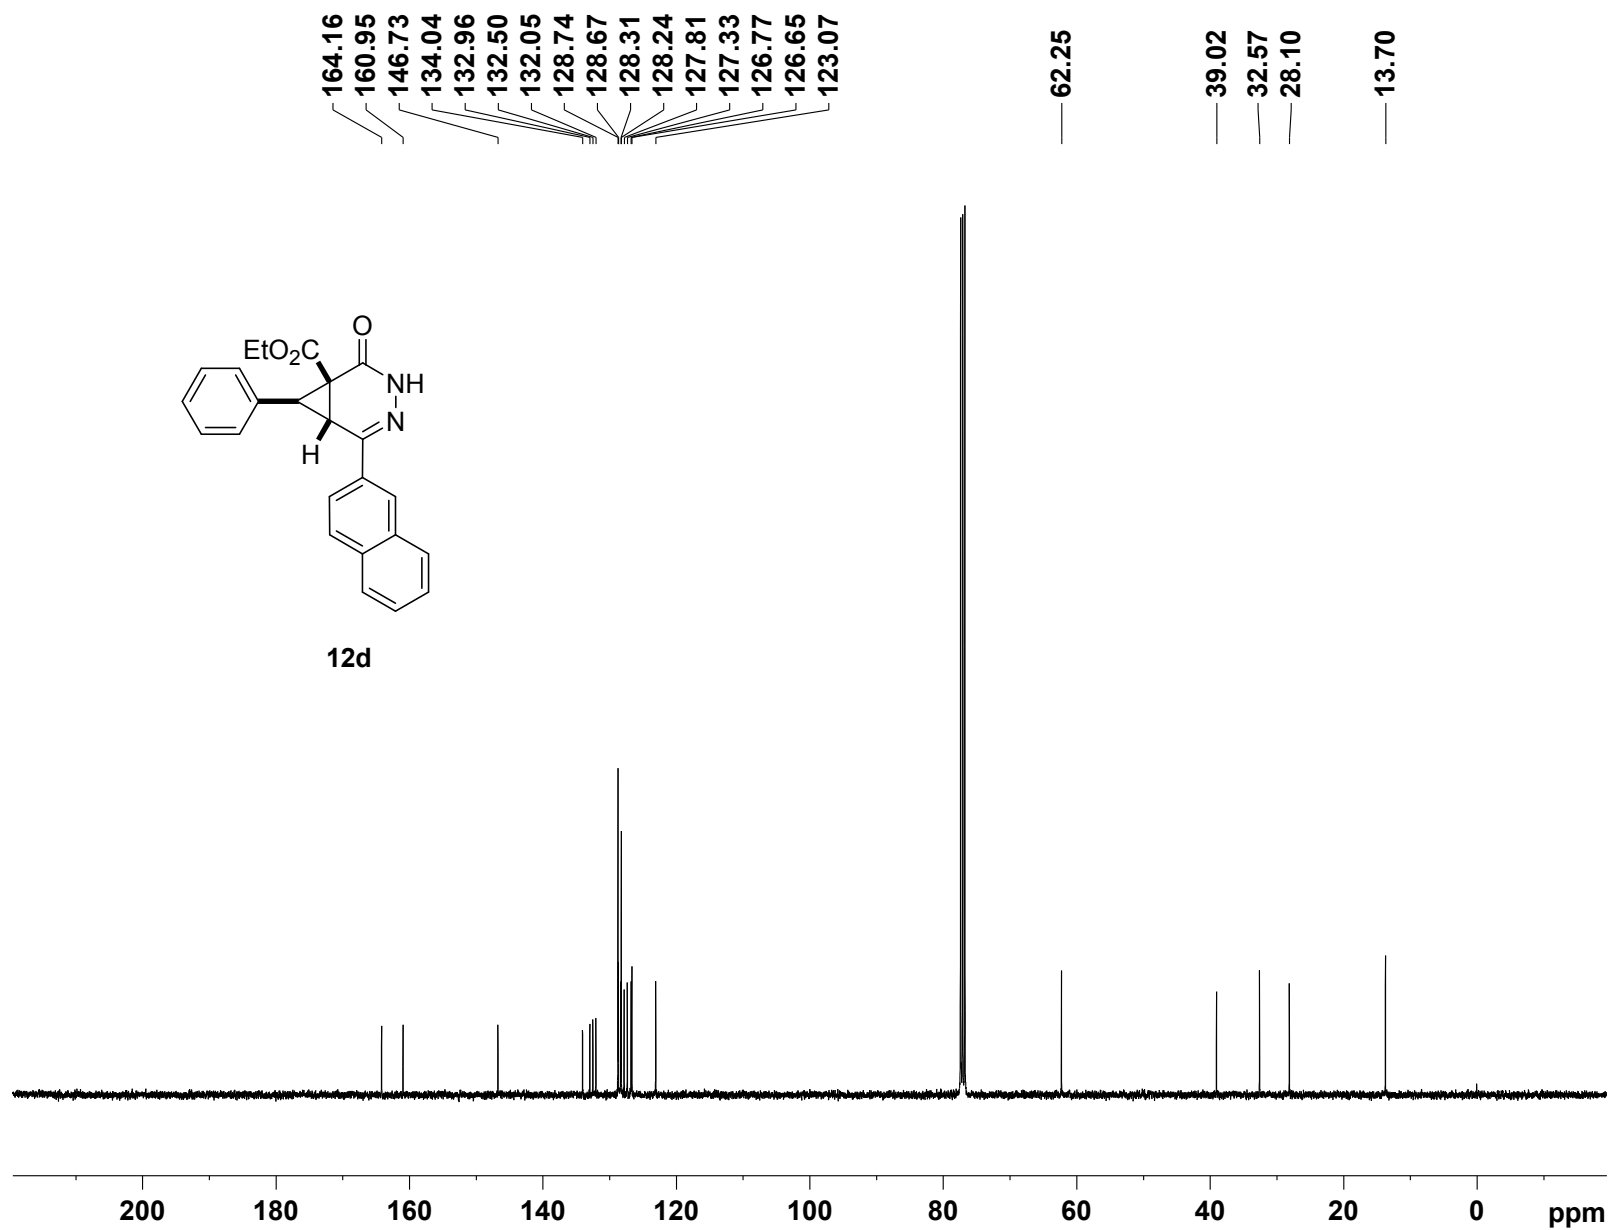

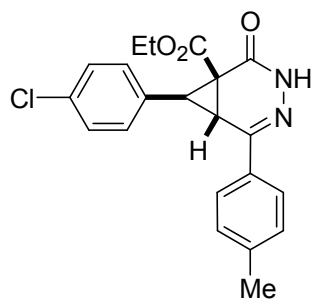

12e

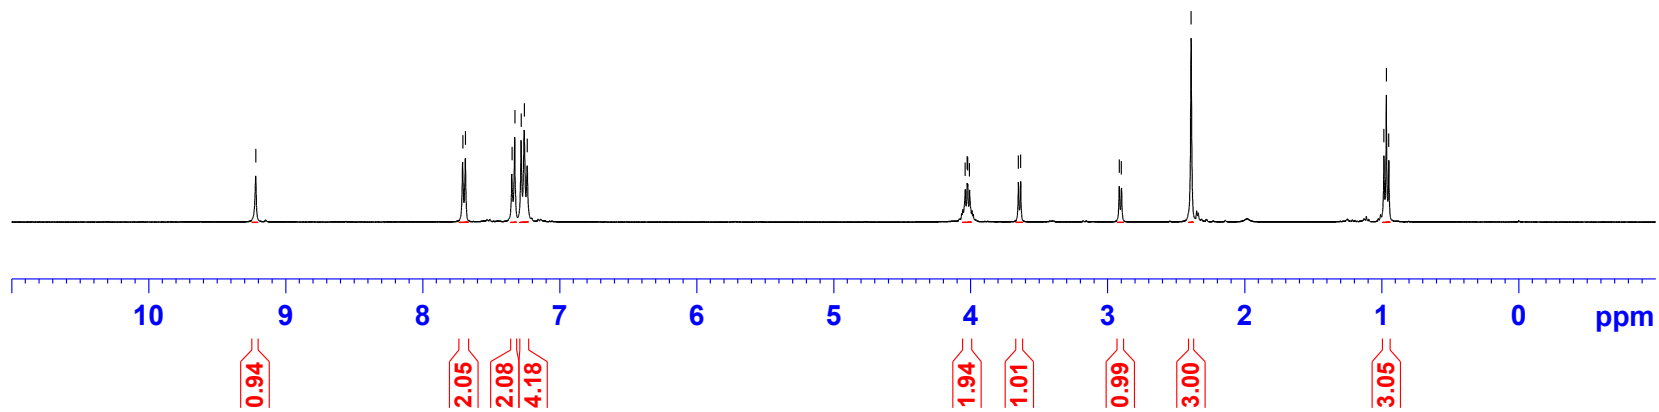

— 9.217

7.707  
7.687  
7.348  
7.327  
7.280  
7.257  
7.235

4.039  
4.026  
4.022  
4.008  
3.652  
3.636  
2.916  
2.899  
— 2.391

0.984  
0.966  
0.948

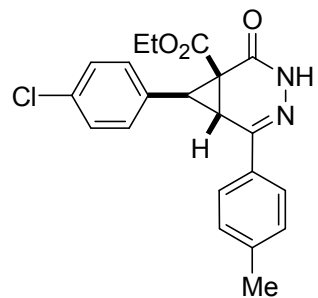

12e

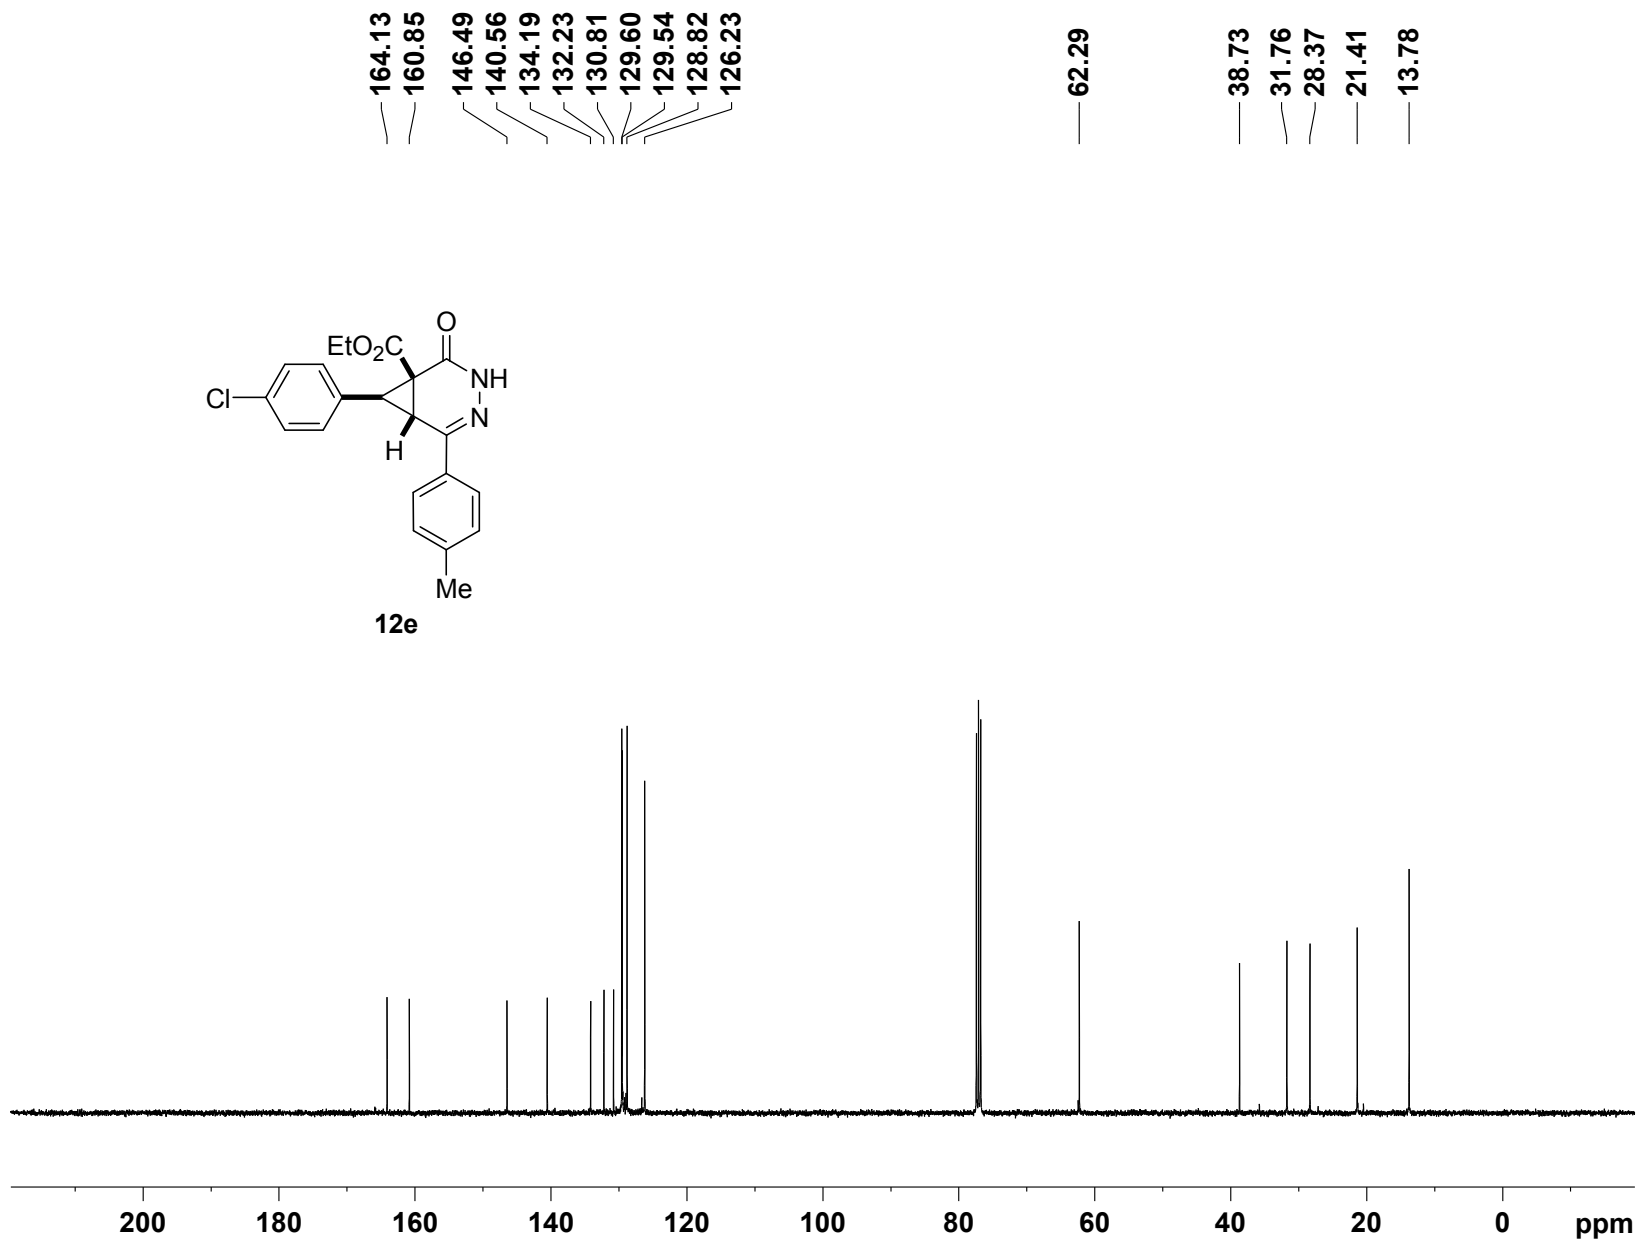

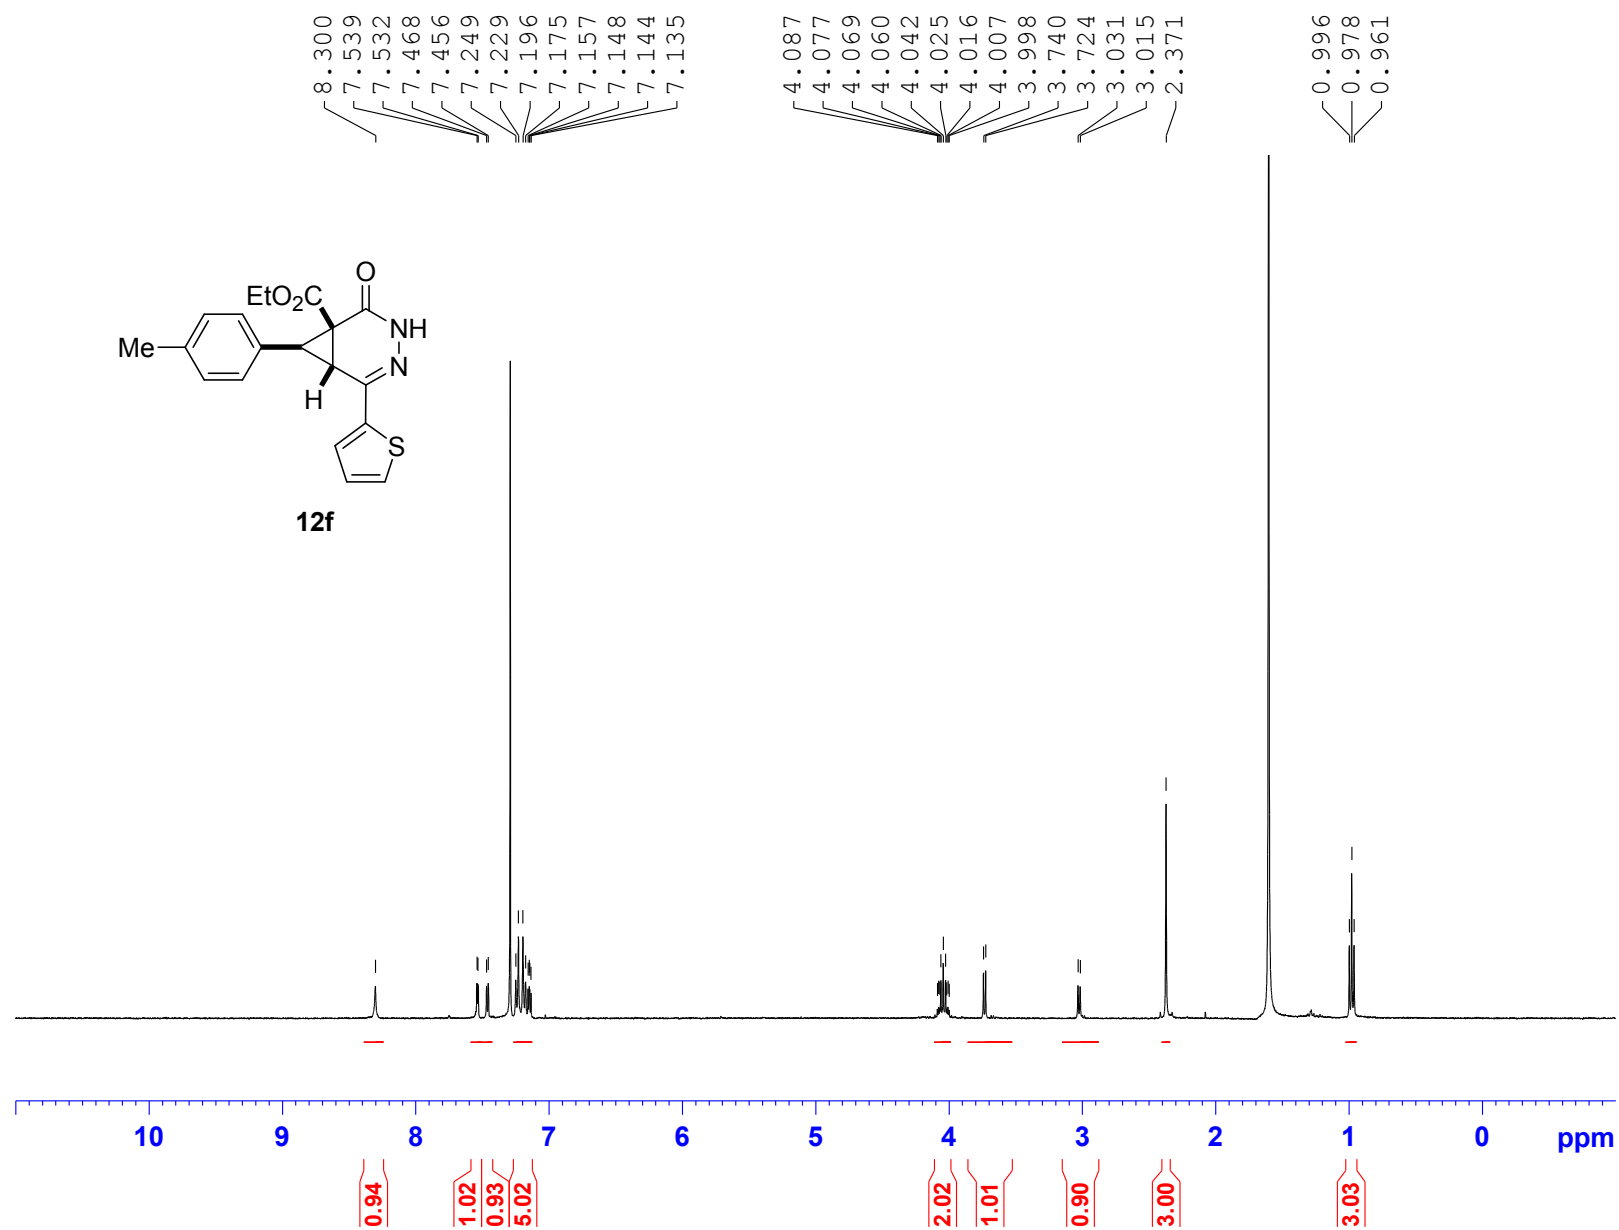

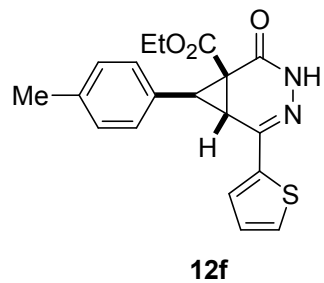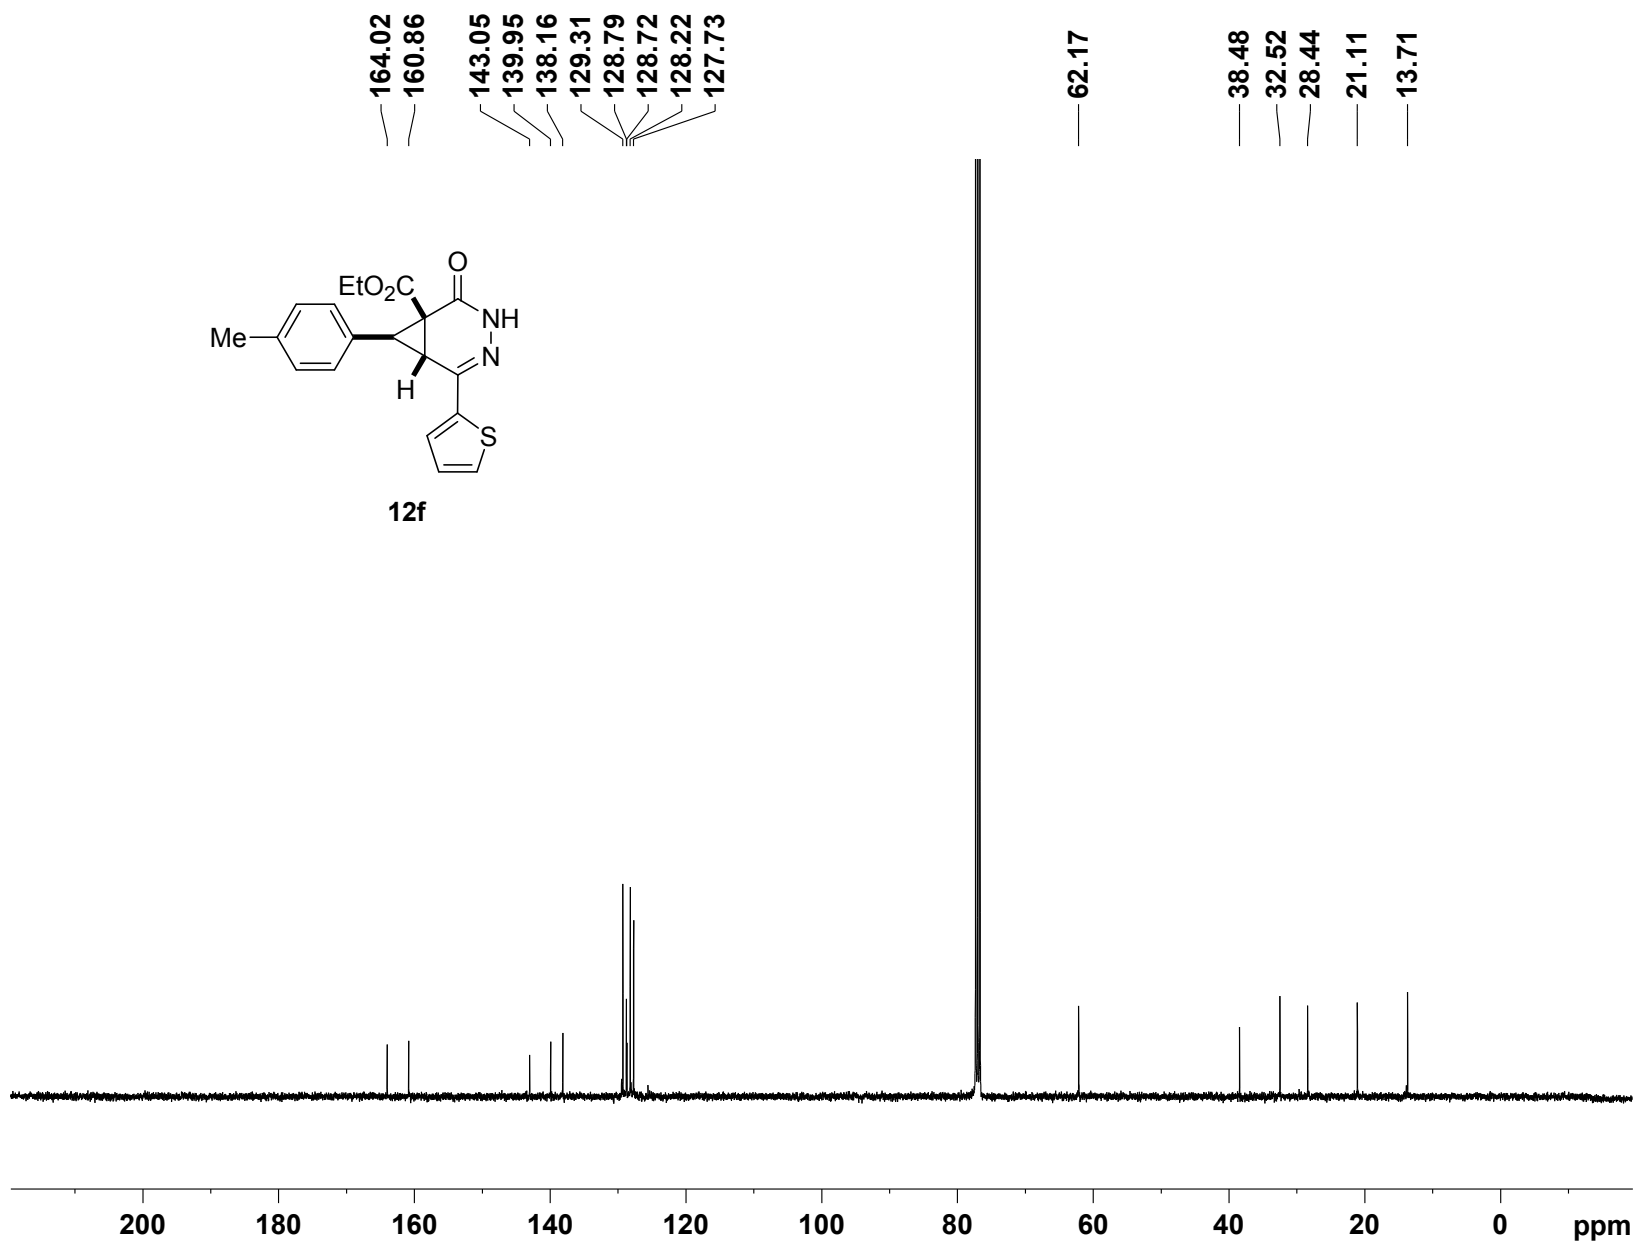

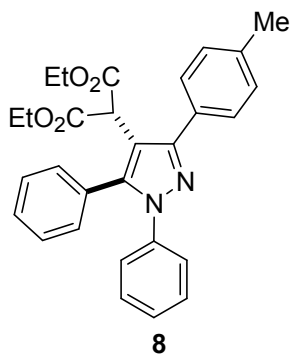

7.721  
7.702  
7.435  
7.417  
7.398  
7.377  
7.374  
7.359  
7.323  
7.303  
7.271  
7.253  
7.234  
7.216  
7.197  
7.141  
7.122

4.698

3.957  
3.939  
3.922  
3.904

2.344

1.125  
1.108  
1.090

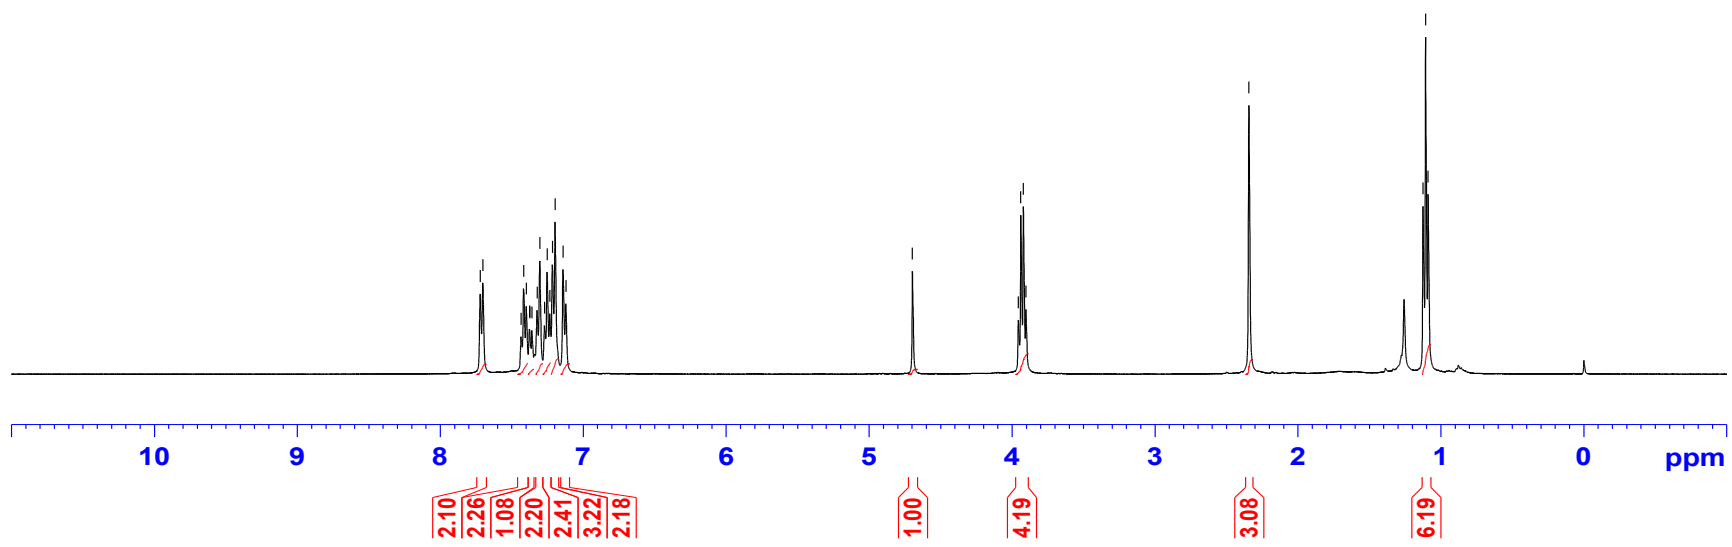



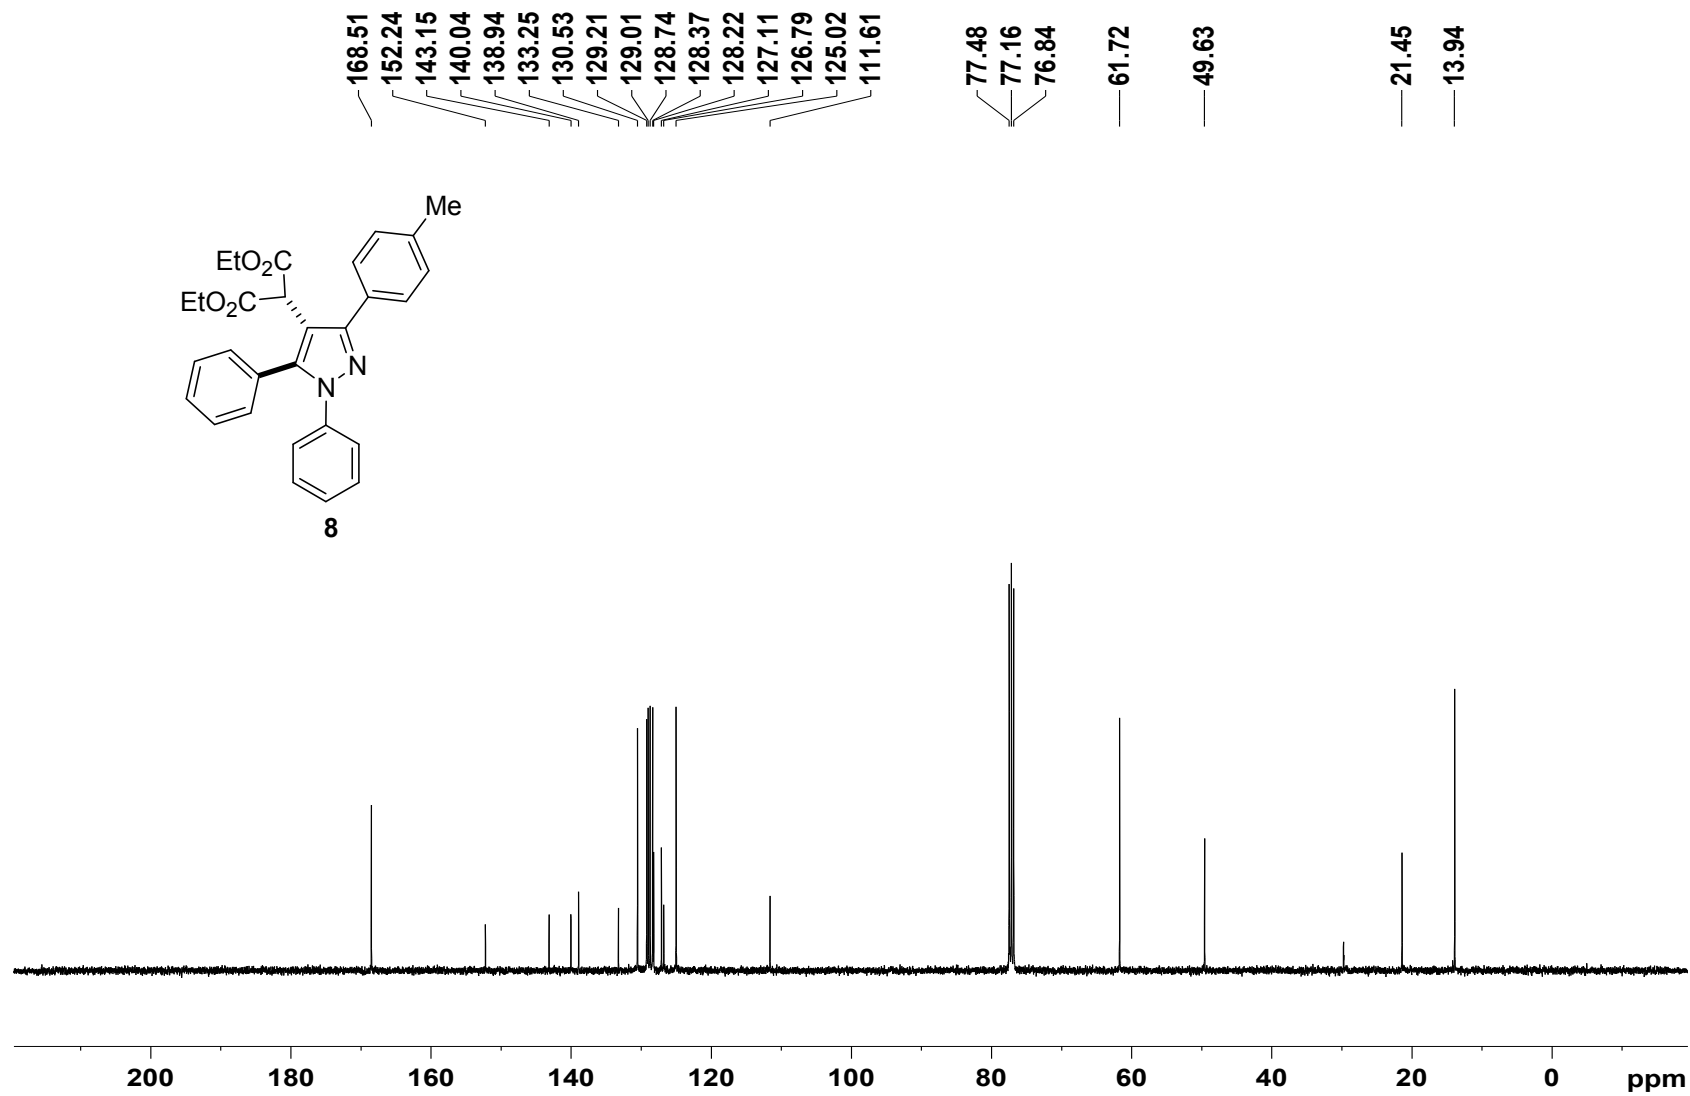

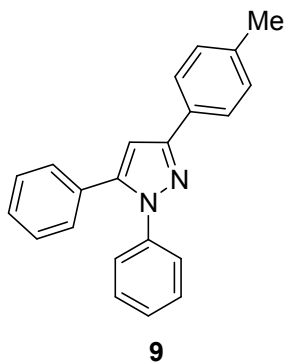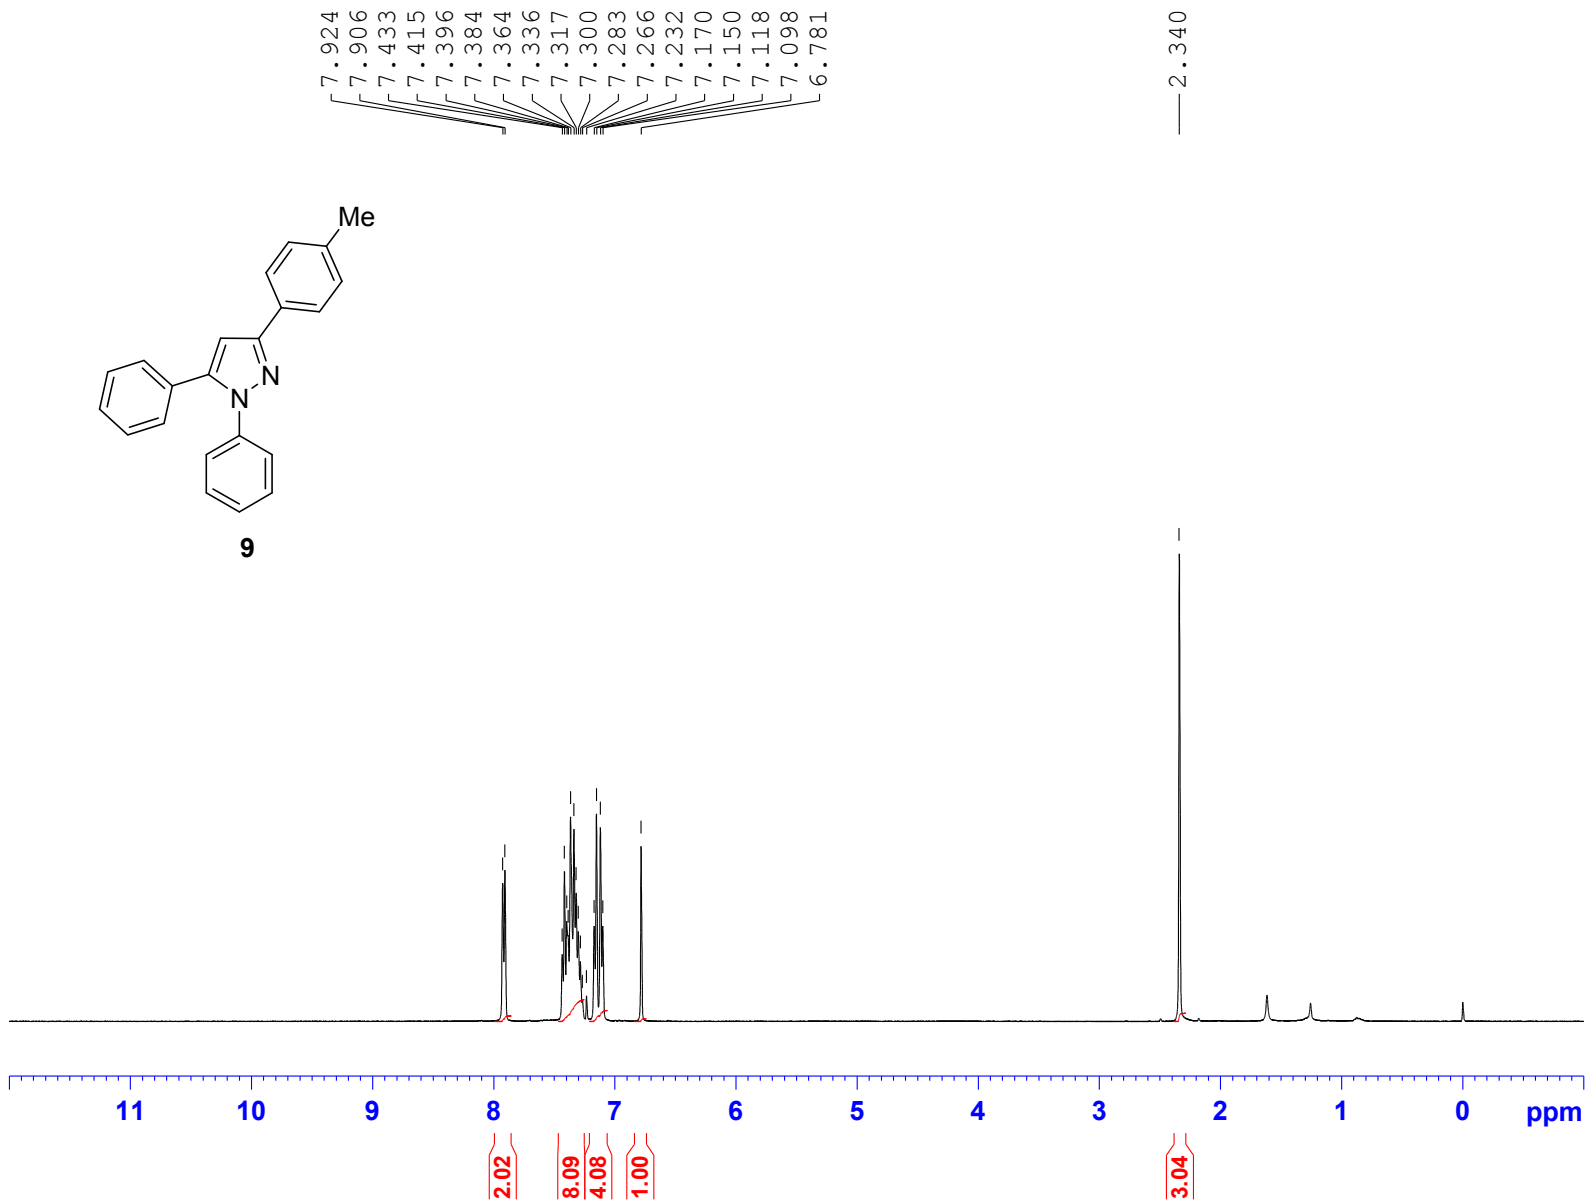

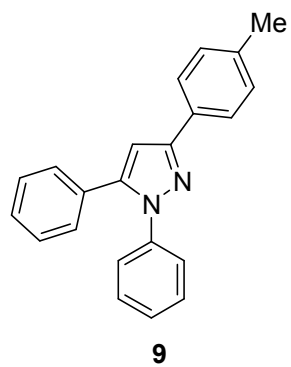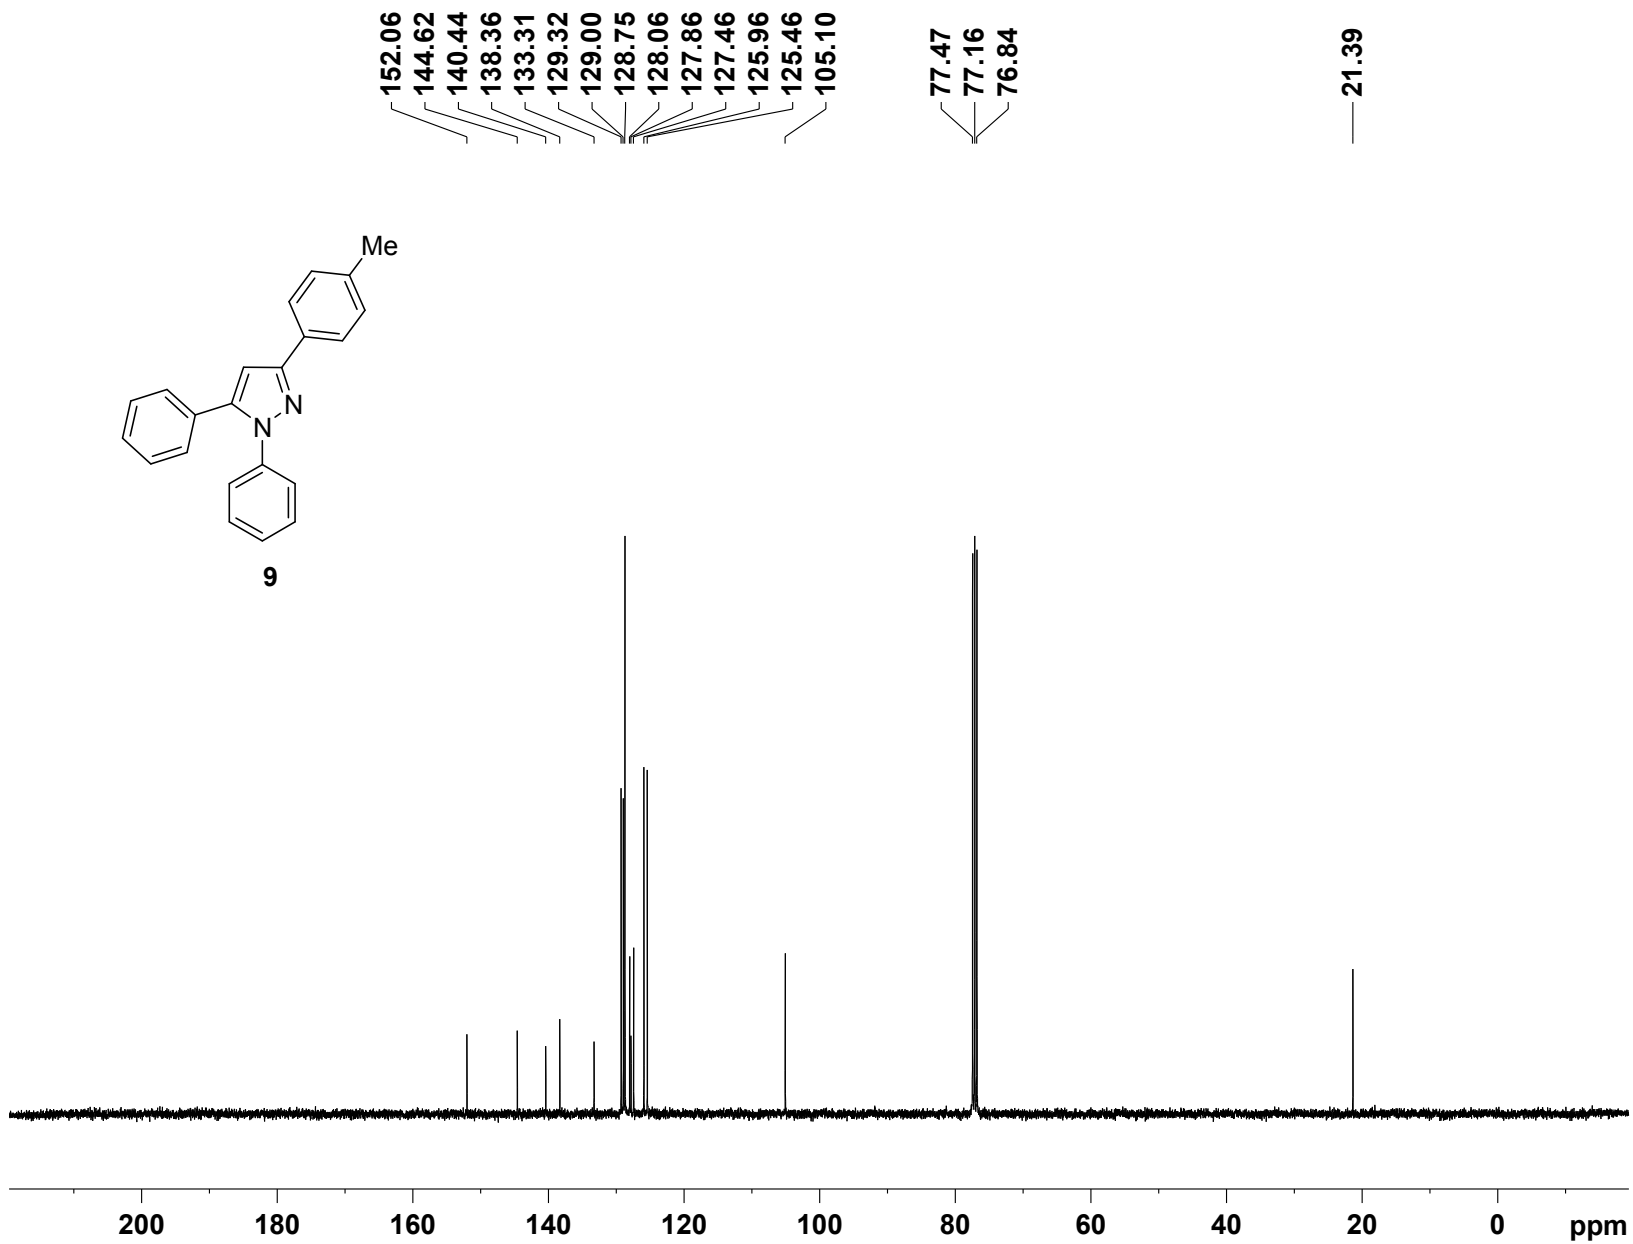

Supplement: c6ob02552h1.pdf [file c6ob02552h1.pdf]
